# Supplementary material for: Platinum-catalyzed 1,3-acyloxy migration/[1,5]-hydride transfer/cycloaddition sequence: synthesis of ring-fused tetrahydroquinolines
Source: Royal Society of Chemistry journal article supplement (doi:10.1039/c1ra00789k), 2011-11-17

# Platinum-Catalyzed 1,3-Acyloxy Migration / [1,5]-Hydride Transfer/ Cycloaddition Sequence: Synthesis of Ring-Fused Tetrahydroquinolines

*Xiao-Feng Xia,<sup>†</sup> Xian-Rong Song,<sup>†</sup> Ning Wang,<sup>†</sup> Hai-Long Wei,<sup>††</sup> Xue-Yuan Liu,<sup>†</sup>  
Yong-Min Liang<sup>\*,†,‡</sup>*

<sup>†</sup>State Key Laboratory of Applied Organic Chemistry, Lanzhou University, Lanzhou  
730000.

<sup>‡</sup>State Key Laboratory of Solid Lubrication, Lanzhou Institute of Chemical Physics,  
Chinese Academy of Science, Lanzhou 730000, P. R. China

<sup>††</sup>State Key Laboratory for Oxo Synthesis and Selective Oxidation, Lanzhou Institute  
of Chemical Physics, Chinese Academy of Sciences, Lanzhou 730000, P. R. China.

E-mail: [liangym@lzu.edu.cn](mailto:liangym@lzu.edu.cn)

## Table of Contents

|                                                                                         |                |
|-----------------------------------------------------------------------------------------|----------------|
| <b>1. General Remarks</b>                                                               | <b>S2</b>      |
| <b>2. Typical procedure for the preparation of propargylic esters derivatives</b>       | <b>S2-S3</b>   |
| <b>3. General procedure for the preparation of product 2a-2o</b>                        | <b>S3</b>      |
| <b>4. Characterization data of 1a-1t and D-1a</b>                                       | <b>S4-S11</b>  |
| <b>5. Characterization data of 2a-2o and D-2a</b>                                       | <b>S11-S16</b> |
| <b>6. <sup>1</sup>H NMR and <sup>13</sup>C NMR spectra for compounds 1a-1t and D-1a</b> | <b>S17-S58</b> |
| <b>7. <sup>1</sup>H NMR and <sup>13</sup>C NMR spectra for compounds 2a-2o and D-2a</b> | <b>S59-S94</b> |
| <b>8. 2D-NMR of product 2a</b>                                                          | <b>S96-S99</b> |

### General Remarks:

Column chromatography was carried out on silica gel. Unless noted  $^1\text{H}$  NMR spectra were recorded on 400 MHz or 300 MHz in  $\text{CDCl}_3$ ,  $^{13}\text{C}$  NMR spectra were recorded on 100 MHz or 75 MHz in  $\text{CDCl}_3$  using TMS as internal standard. IR spectra were recorded on an FT-IR spectrometer and only major peaks are reported in  $\text{cm}^{-1}$ . Melting points were determined on a microscopic apparatus and were uncorrected. All products were further characterized by HRMS (high resolution mass spectra); copies of their  $^1\text{H}$  NMR and  $^{13}\text{C}$  NMR spectra are provided. Commercially available reagents and solvents were used without further purification.

### Typical procedure for the preparation of propargylic esters derivatives

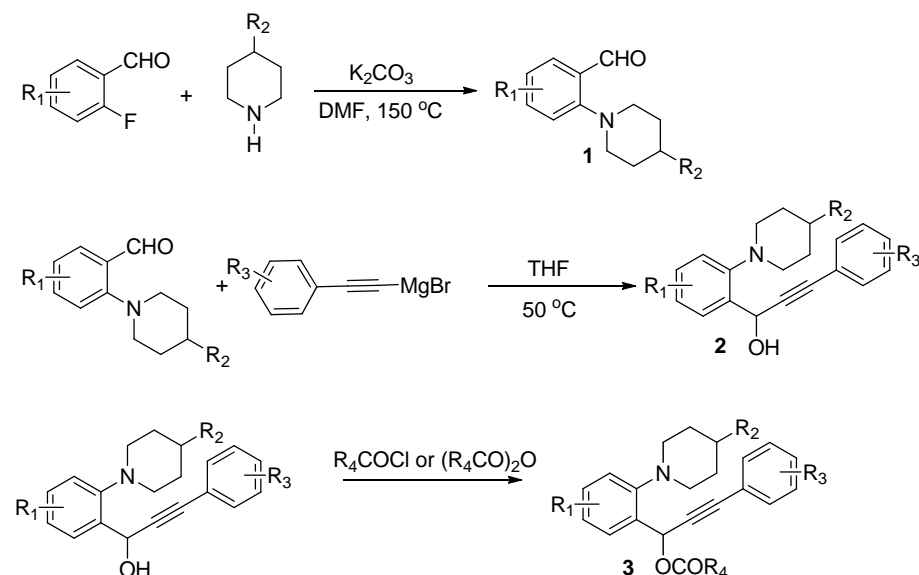

(i) To a stirred solution of potassium carbonate (3.0 g, 22.0 mmol) in 20 mL DMF was added 2-fluorobenzaldehyde (2.5 g, 20 mmol) and piperidine (1.9 g, 22.0 mmol). After heating the reaction mixture at reflux for 8 h, it was cooled and diluted with diethyl ether and water. The organic layer was extracted with diethyl ether ( $2 \times 20$  mL). The combined organic phases were washed with brine and dried over sodium sulfate. The solvent was removed by rotary evaporation and purified by column chromatography on silica gel.

(ii) To a stirring solution of 2-(piperidin-1-yl)benzaldehyde (1 equiv) in THF (1.0 M) was added phenylethyne (1.0 M in THF, 2 equiv) at room temperature. After heating the reaction mixture at  $50\text{ }^\circ\text{C}$  for 6 h, the reaction mixture was quenched by addition of saturated aqueous ammonium chloride (40 mL) and

extracted with ethyl ether ( $2 \times 40$  mL). The combined organic layers were washed with brine, dried over  $\text{Na}_2\text{SO}_4$ , and concentrated under reduced pressure. The crude material was purified by flash column chromatography to obtain the pure product.

(iii) To a stirred solution of **2**, DMAP (5 %), and pyridine (10 equiv.) in 20 mL DCM was slowly added acyl chloride at 0 °C, or to a stirred solution of **2**, triethylamine (3 eq), DMAP (10 %) was slowly added acetic anhydride (1.3 eq) at 0 °C, when the reaction was finished, 5 ml water was added. The organic layer was extracted with DCM ( $2 \times 20$  mL). The combined organic phases were washed with brine and dried over sodium sulfate. The solvent was removed by rotary evaporation and purified by column chromatography on silica gel.

#### **General procedure for the preparation of product 2a-2o**

To a test tube, **propargylic esters derivatives** (0.20 mmol),  $\text{PtCl}_2$  (15 mol %),  $\text{LiCl}$  (2eq) and  $\text{CaO}$  (4 eq) were added. The test tube was purged under vacuum and then refilled with argon 3 times. Toluene (2.0 mL) was then injected, and the mixture was allowed to stir at 110 °C. When the reaction was considered complete as determined by TLC analysis, ethyl acetate (20 mL) and water (20 mL) were then added to the reaction mixture. The organic layer was extracted with ethyl acetate ( $2 \times 20$  mL). The combined organic phases were washed with brine and dried over sodium sulfate. The residue was purified by flash chromatography on alkalescence silica gel to afford corresponding products. The separated product was then treated with  $\text{K}_2\text{CO}_3$  (3 eq) and methanol (2 ml). When the reaction was considered complete as determined by TLC analysis, ethyl acetate (10 mL) and water (5 mL) were then added to the reaction mixture. The organic layer was extracted with ethyl acetate ( $2 \times 10$  mL). The combined organic phases were washed with brine and dried over sodium sulfate. The residue was purified by flash chromatography on alkalescence silica gel to afford corresponding products.

#### **Characterization data of 1a-1t and D-1a**

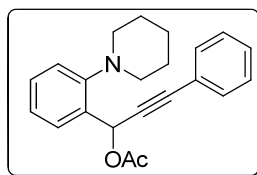

**1a** was obtained according to the above method. mp:62-63 °C.  $^1\text{H}$  NMR (400 MHz,  $\text{CDCl}_3$ ):  $\delta$  7.78-7.80 (m, 1 H), 7.44-7.46 (m, 2 H), 7.33-7.37 (m, 1 H), 7.25-7.31 (m, 3 H), 7.17-7.20 (m, 3 H), 2.78-2.89 (m, 4 H), 2.11 (s, 3 H), 1.66-1.80 (m, 4 H), 1.55-1.60 (m 2 H);  $^{13}\text{C}$  NMR (100 MHz,  $\text{CDCl}_3$ ):  $\delta$  169.7, 152.6, 133.1, 131.9, 129.8, 129.1, 128.5, 128.2, 124.3, 122.5, 121.2, 86.9, 85.9, 61.8, 54.8, 26.5, 24.2, 21.1; IR (neat,  $\text{cm}^{-1}$ ) 2936, 2852, 2800, 1742, 1598, 1489, 1447, 1372, 1226, 1016, 951, 915, 759, 691, 535; HRMS (ESI)  $m/z$ : calcd for  $\text{C}_{22}\text{H}_{23}\text{NO}_2$ :  $M+H = 334.1802$ ; found: 334.1798.

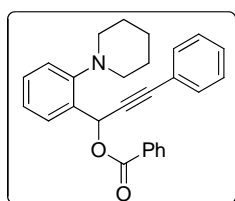

**1b** was obtained according to the above method. mp: 129-130 °C.  $^1\text{H}$  NMR (400 MHz,  $\text{CDCl}_3$ ):  $\delta$  8.07-8.09 (m, 2 H), 7.89-7.92 (m, 1 H), 7.44-7.53 (m, 1 H), 7.34-7.43 (m, 6 H), 7.19-7.29 (m, 5 H), 2.79-2.92 (m, 4 H), 1.63-1.74 (m, 4 H), 1.53-1.58 (m, 2 H);  $^{13}\text{C}$  NMR (100 MHz,  $\text{CDCl}_3$ ):  $\delta$  165.3, 152.8, 133.3, 132.9, 131.9, 130.2, 129.8, 129.7, 129.1, 128.5, 128.3, 128.2, 128.1, 124.4, 122.5, 121.3, 87.0, 86.1, 62.5, 54.9, 26.6, 26.5, 24.2; IR (neat,  $\text{cm}^{-1}$ ) 2935, 2852, 2801, 1722, 1599, 1489, 1448, 1378, 1319, 1267, 1098, 1028, 918, 759, 712, 597; HRMS (ESI)  $m/z$ : calcd for  $\text{C}_{27}\text{H}_{25}\text{NO}_2$ :  $M+H = 396.1958$ ; found: 396.1966.

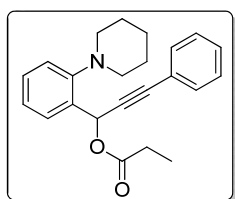

**1c** was obtained according to the above method as an oil.  $^1\text{H}$  NMR (400 MHz,  $\text{CDCl}_3$ ):

$\delta$  7.69-7.72 (m, 1 H), 7.35-7.37 (m, 2 H), 7.23-7.27 (m, 1 H), 7.15-7.20 (m, 3 H), 7.08-7.13 (m, 3 H), 2.70-2.81 (m, 4 H), 2.21-2.38 (m, 2 H), 1.58-1.71 (m, 4 H), 1.46-1.48 (m, 2 H), 1.06-1.09 (m, 3 H);  $^{13}\text{C}$  NMR (100 MHz,  $\text{CDCl}_3$ ):  $\delta$  173.0, 152.6, 133.3, 131.8, 129.7, 128.9, 128.4, 128.1, 124.3, 122.5, 121.1, 87.1, 85.8, 61.6, 54.8, 29.7, 27.7, 26.5, 24.2, 9.0; IR (neat,  $\text{cm}^{-1}$ ) 2926, 2852, 1742, 1489, 1450, 1223, 1165, 1071, 1028, 919, 758, 691; HRMS (ESI)  $m/z$ : calcd for  $\text{C}_{23}\text{H}_{25}\text{NO}_2$ :  $M+H = 348.1958$ ; found: 348.1952.

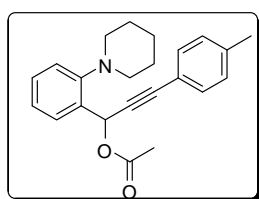

**1d** was obtained according to the above method. mp: 79-80 °C.  $^1\text{H}$  NMR (400 MHz,  $\text{CDCl}_3$ ):  $\delta$  7.69-7.71 (m, 1 H), 7.21-7.24 (m, 3 H), 7.05-7.09 (m, 3 H), 6.95-6.98 (m, 2 H), 2.68-2.81 (m, 4 H), 2.21 (s, 3 H), 1.98 (s, 3 H), 1.55-1.68 (m, 4 H), 1.43-1.46 (m, 2 H);  $^{13}\text{C}$  NMR (100 MHz,  $\text{CDCl}_3$ ):  $\delta$  169.5, 152.5, 138.5, 133.2, 131.7, 129.6, 128.9, 128.8, 124.3, 121.1, 119.4, 86.2, 86.0, 67.8, 61.8, 54.7, 26.4, 24.1, 21.3, 20.9; IR (neat,  $\text{cm}^{-1}$ ) 2933, 2853, 2801, 1741, 1600, 1488, 1448, 1372, 1226, 1015, 951, 912, 818, 760, 554; HRMS (ESI)  $m/z$ : calcd for  $\text{C}_{23}\text{H}_{25}\text{NO}_2$ :  $M+H = 348.1958$ ; found: 348.1948.

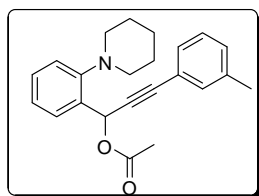

**1e** was obtained according to the above method as an oil.  $^1\text{H}$  NMR (400 MHz,  $\text{CDCl}_3$ ):  $\delta$  7.78-7.80 (m, 1 H), 7.31-7.35 (m, 1 H), 7.22-7.27 (m, 2 H), 7.14-7.18 (m, 4 H), 7.08-7.10 (m, 1 H), 2.78-2.88 (m, 4 H), 2.29 (s, 3 H), 2.09 (s, 3 H), 1.68-1.76 (m, 4 H), 1.55-1.56 (m, 2 H);  $^{13}\text{C}$  NMR (100 MHz,  $\text{CDCl}_3$ ):  $\delta$  169.6, 152.6, 137.8, 133.1, 132.4, 129.7, 129.3, 129.0, 128.9, 128.0, 124.3, 122.2, 121.1, 86.5, 86.1, 61.8, 54.8, 26.5,

24.2, 21.1; IR (neat,  $\text{cm}^{-1}$ ) 2934, 2255, 1735, 1601, 1448, 1374, 1244, 1046, 912, 734, 648, 608; HRMS (ESI)  $m/z$ : calcd for  $\text{C}_{23}\text{H}_{25}\text{NO}_2$ :  $M+H = 348.1958$ ; found: 348.1949.

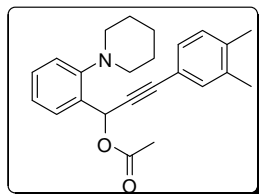

**1f** was obtained according to the above method. mp: 72-73 °C.  $^1\text{H}$  NMR (400 MHz,  $\text{CDCl}_3$ ):  $\delta$  7.78-7.80 (m, 1 H), 7.32-7.36 (m, 1 H), 7.16-7.25 (m, 5 H), 7.03-7.05 (m, 1 H), 2.78-2.89 (m, 4 H), 2.23 (s, 3 H), 2.21 (s, 3 H), 2.09 (s, 3 H), 1.67-1.76 (m, 4 H), 1.55-1.58 (m, 2 H);  $^{13}\text{C}$  NMR (100 MHz,  $\text{CDCl}_3$ ):  $\delta$  169.7, 152.6, 137.4, 136.5, 133.3, 132.9, 129.7, 129.5, 129.3, 129.1, 124.3, 121.1, 119.7, 86.2, 85.9, 61.9, 54.8, 26.5, 24.2, 21.1, 19.7, 19.5; IR (neat,  $\text{cm}^{-1}$ ) 2927, 2228, 1740, 1600, 1493, 1448, 1373, 1228, 1025, 952, 821, 758, 538; HRMS (ESI)  $m/z$ : calcd for  $\text{C}_{24}\text{H}_{27}\text{NO}_2$ :  $M+H = 362.2115$ ; found: 362.2109.

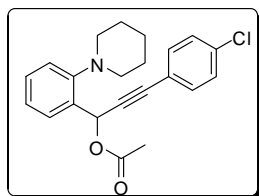

**1g** was obtained according to the above method. mp: 65-66 °C.  $^1\text{H}$  NMR (400 MHz,  $\text{CDCl}_3$ ):  $\delta$  7.75-7.77 (m, 1 H), 7.33-7.38 (m, 3 H), 7.25-7.28 (m, 2 H), 7.16-7.20 (m, 3 H), 2.78-2.90 (m, 4 H), 2.10 (s, 3 H), 1.65-1.78 (m, 4 H), 1.54-1.57 (m, 2 H);  $^{13}\text{C}$  NMR (100 MHz,  $\text{CDCl}_3$ ):  $\delta$  169.7, 152.6, 134.5, 133.1, 132.9, 129.9, 128.9, 128.5, 124.4, 121.3, 120.9, 87.9, 84.7, 61.7, 54.8, 26.5, 24.2, 21.1; IR (neat,  $\text{cm}^{-1}$ ) 2933, 2852, 1742, 1597, 1489, 1448, 1372, 1226, 1092, 1016, 951, 915, 829, 763, 545; HRMS (ESI)  $m/z$ : calcd for  $\text{C}_{22}\text{H}_{22}\text{NClO}_2$ :  $M+H = 368.1412$ ; found: 368.1409.

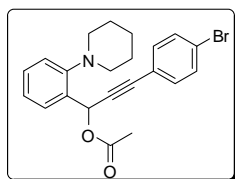

**1h** was obtained according to the above method. mp: 85-86 °C.  $^1\text{H}$  NMR (400 MHz,  $\text{CDCl}_3$ ):  $\delta$  7.75-7.77 (m, 1 H), 7.41-7.43 (m, 2 H), 7.29-7.37 (m, 3 H), 7.16-7.20 (m, 3 H), 2.78-2.87 (m, 4 H), 2.10 (s, 3 H), 1.66-1.77 (m, 4 H), 1.55-1.56 (m, 2 H);  $^{13}\text{C}$  NMR (100 MHz,  $\text{CDCl}_3$ ):  $\delta$  169.7, 152.6, 133.2, 132.8, 131.4, 129.8, 128.9, 124.4, 122.8, 121.4, 121.3, 88.1, 84.8, 77.2, 61.7, 54.8, 26.5, 24.1, 21.1; IR (neat,  $\text{cm}^{-1}$ ) 2934, 2852, 2801, 1742, 1596, 1487, 1448, 1371, 1325, 1225, 1068, 1014, 951, 914, 825, 760, 544; HRMS (ESI)  $m/z$ : calcd for  $\text{C}_{22}\text{H}_{22}\text{NBrO}_2$ :  $M+H = 412.0907$ ; found: 412.0916.

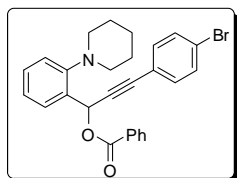

**1i** was obtained according to the above method as an oil.  $^1\text{H}$  NMR (400 MHz,  $\text{CDCl}_3$ ):  $\delta$  8.07-8.09 (m, 2 H), 7.86-7.88 (m, 1 H), 7.52-7.56 (m, 1 H), 7.37-7.44 (m, 6 H), 7.29-7.35 (m, 2 H), 7.19-7.31 (m, 2 H), 2.79-2.89 (m, 4 H), 1.67-1.69 (m, 4 H), 1.53-1.54 (m, 2 H);  $^{13}\text{C}$  NMR (100 MHz,  $\text{CDCl}_3$ ):  $\delta$  165.3, 152.8, 133.3, 133.0, 132.9, 131.5, 131.4, 130.1, 129.9, 129.8, 129.1, 128.3, 124.4, 122.8, 121.5, 121.3, 88.2, 85.0, 62.4, 54.9, 26.5, 24.2; IR (neat,  $\text{cm}^{-1}$ ) 2926, 2853, 1724, 1596, 1487, 1452, 1380, 1319, 1265, 1096, 1068, 1018, 924, 823, 759, 711, 601, 547; HRMS (ESI)  $m/z$ : calcd for  $\text{C}_{27}\text{H}_{24}\text{NBrO}_2$ :  $M+H = 474.1063$ ; found: 474.1068.

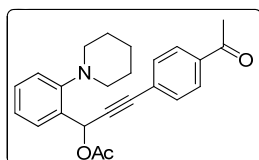

**1j** was obtained according to the above method as an oil.  $^1\text{H}$  NMR (400 MHz,  $\text{CDCl}_3$ ):  $\delta$  7.87-7.89 (m, 2 H), 7.76-7.78 (m, 1 H), 7.51-7.53 (m, 2 H), 7.33-7.37 (m, 1 H), 7.17-7.21 (m, 3 H), 2.79-2.91 (m, 4 H), 2.57 (s, 3 H), 2.11 (s, 3 H), 1.67-1.78 (m, 4 H), 1.54-1.57 (m, 2 H);  $^{13}\text{C}$  NMR (100 MHz,  $\text{CDCl}_3$ ):  $\delta$  197.0, 169.5, 152.6, 136.4, 132.6,

131.8, 129.9, 128.9, 128.0, 127.2, 124.4, 121.3, 90.3, 84.9, 61.6, 54.7, 26.4, 24.1, 20.9;  
IR (neat,  $\text{cm}^{-1}$ ) 2935, 2801, 1742, 1685, 1600, 1488, 1444, 1366, 1261, 1224, 1016,  
954, 837, 758, 669, 602; HRMS (ESI)  $m/z$ : calcd for  $\text{C}_{24}\text{H}_{25}\text{NO}_3$ :  $M+H = 376.1907$ ;  
found: 376.1896.

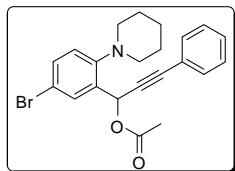

**1k** was obtained according to the above method. mp: 69-70 °C.  $^1\text{H}$  NMR (400 MHz,  $\text{CDCl}_3$ ):  $\delta$  7.86 (s, 1 H), 7.42-7.48 (m, 3 H), 7.26-7.38 (m, 3 H), 7.10 (s, 1 H), 7.03-7.05 (m, 1 H), 2.84-2.89 (m, 2 H), 2.74-2.79 (m, 2 H), 2.11 (s, 3 H), 1.65-1.78 (m, 4 H), 1.53-1.56 (m, 2 H);  $^{13}\text{C}$  NMR (100 MHz,  $\text{CDCl}_3$ ):  $\delta$  170.8, 169.4, 151.9, 151.4, 135.4, 133.1, 132.6, 131.8, 131.7, 131.5, 128.6, 128.2, 123.0, 122.1, 121.7, 117.3, 116.2, 86.3, 86.2, 61.7, 61.1, 54.7, 54.3, 26.4, 24.1, 21.0, 20.9; IR (neat,  $\text{cm}^{-1}$ ) 2935, 2852, 2803, 1744, 1484, 1447, 1372, 1327, 1227, 1108, 1021, 958, 914, 867, 820, 756, 691, 657, 533; HRMS (ESI)  $m/z$ : calcd for  $\text{C}_{22}\text{H}_{22}\text{NBrO}_2$ :  $M+H = 412.0907$ ; found: 412.0897.

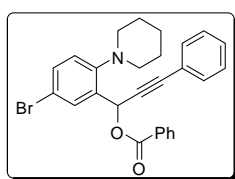

**1l** was obtained according to the above method as an oil.  $^1\text{H}$  NMR (400 MHz,  $\text{CDCl}_3$ ):  $\delta$  8.08-8.09 (m, 2 H), 7.99-8.07 (m, 1 H), 7.52-7.58 (m, 1 H), 7.36-7.46 (m, 6 H), 7.23-7.30 (m, 3 H), 7.05-7.07 (m, 1 H), 2.76-2.90 (m, 4 H), 1.68-1.71 (m, 4 H), 1.49-1.55 (m, 2 H);  $^{13}\text{C}$  NMR (100 MHz,  $\text{CDCl}_3$ ):  $\delta$  165.1, 151.7, 135.5, 133.1, 132.7, 132.0, 131.9, 129.9, 129.8, 129.6, 128.6, 128.4, 128.3, 128.2, 123.1, 122.2, 117.3, 86.6, 86.2, 61.8, 54.7, 54.3, 26.4, 26.3, 24.0; IR (neat,  $\text{cm}^{-1}$ ) 2936, 2852, 2804, 1723, 1596, 1484, 1317, 1264, 1175, 1097, 1028, 911, 821, 755, 733, 711, 651, 604, 535;



HRMS (ESI)  $m/z$ : calcd for  $C_{27}H_{24}NBrO_2$ :  $M+H = 474.1063$ ; found: 474.1073.

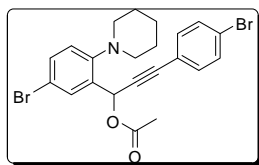

**1m** was obtained according to the above method. mp: 87-88 °C.  $^1H$  NMR (400 MHz,  $CDCl_3$ ):  $\delta$  7.83-7.84 (m, 1 H), 7.41-7.45 (m, 3 H), 7.29-7.31 (m, 2 H), 7.03-7.08 (m, 2 H), 2.74-2.88 (m, 4 H), 2.12 (s, 3 H), 1.64-1.77 (m, 4 H), 1.53-1.56 (m, 2 H);  $^{13}C$  NMR (100 MHz,  $CDCl_3$ ):  $\delta$  169.4, 151.4, 135.0, 133.2, 132.7, 131.7, 131.5, 123.1, 123.0, 121.1, 117.3, 87.4, 85.1, 61.0, 54.6, 26.3, 24.0, 20.9; IR (neat,  $cm^{-1}$ ) 2935, 2853, 2804, 1745, 1483, 1372, 1328, 1225, 1069, 1015, 958, 913, 869, 823, 733, 656, 606, 538; HRMS (ESI)  $m/z$ : calcd for  $C_{22}H_{21}NBr_2O_2$ :  $M+H = 490.0012$ ; found: 490.0020.

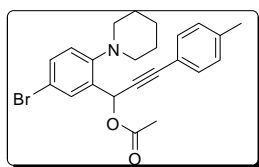

**1n** was obtained according to the above method as an oil.  $^1H$  NMR (400 MHz,  $CDCl_3$ ):  $\delta$  7.87 (d,  $J = 2.4$  Hz, 1 H), 7.42 (dd,  $J = 6.0, 2.4$  Hz, 1 H), 7.33-7.35 (m, 2 H), 7.08-7.10 (m, 3 H), 7.02 (d,  $J = 8.4$  Hz, 1 H), 2.84-2.86 (m, 2 H), 2.74-2.79 (m, 2 H), 2.32 (s, 3 H), 2.10 (s, 3 H), 1.67-1.75 (m, 4 H), 1.52-1.55 (m, 2 H);  $^{13}C$  NMR (100 MHz,  $CDCl_3$ ):  $\delta$  169.4, 151.4, 138.8, 135.5, 132.5, 131.8, 131.7, 128.9, 122.9, 119.0, 117.3, 86.5, 85.5, 61.2, 54.6, 26.4, 24.0, 21.4, 21.0; IR (neat,  $cm^{-1}$ ) 2927, 2853, 1745, 1508, 1480, 1449, 1373, 1327, 1229, 1176, 1109, 1017, 957, 913, 870, 817, 733, 656, 549; HRMS (ESI)  $m/z$ : calcd for  $C_{23}H_{24}NBrO_2$ :  $M+H = 426.1063$ ; found: 426.1070.

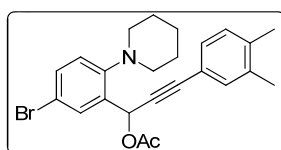

**1o** was obtained according to the above method as an oil.  $^1\text{H}$  NMR (400 MHz,  $\text{CDCl}_3$ ):  $\delta$  7.87 (s, 1 H), 7.39-7.42 (m, 1 H), 7.23 (s, 1 H), 7.18 (d,  $J = 7.6$  Hz, 1 H), 7.09 (s, 1 H), 7.00-7.04 (m, 2 H), 2.84-2.85 (m, 2 H), 2.75-2.77 (m, 2 H), 2.22 (s, 3 H), 2.19 (s, 3 H), 2.10 (s, 3 H), 1.67-1.75 (m, 4 H), 1.53-1.55 (m, 2 H);  $^{13}\text{C}$  NMR (100 MHz,  $\text{CDCl}_3$ ):  $\delta$  169.4, 151.3, 137.5, 136.4, 135.4, 132.8, 132.5, 131.8, 129.4, 129.2, 122.9, 119.2, 117.2, 86.6, 85.2, 61.1, 54.6, 26.3, 23.9, 20.9, 19.6, 19.4; IR (neat,  $\text{cm}^{-1}$ ) 2934, 2854, 2803, 1744, 1682, 1484, 1451, 1372, 1225, 1111, 1023, 958, 912, 821, 734, 656, 538; MS:  $m/z$  439 (2.02), 441 (2.04).

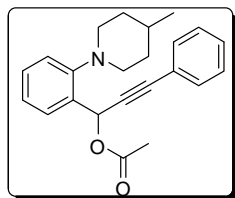

**1p** was obtained according to the above method. mp: 56-57 °C.  $^1\text{H}$  NMR (400 MHz,  $\text{CDCl}_3$ ):  $\delta$  7.77-7.78 (m, 1 H), 7.43-7.45 (m, 2 H), 7.24-7.36 (m, 4 H), 7.16-7.19 (m, 3 H), 2.95-3.12 (m, 2 H), 2.65-2.73 (m, 2 H), 2.10 (s, 3 H), 1.67-1.70 (m, 2 H), 1.36-1.55 (m, 3 H), 0.99 (d,  $J = 5.6$  Hz, 3 H);  $^{13}\text{C}$  NMR (100 MHz,  $\text{CDCl}_3$ ):  $\delta$  169.7, 152.3, 133.1, 131.8, 129.7, 129.0, 128.5, 128.1, 124.3, 122.5, 121.1, 86.9, 85.9, 61.8, 54.5, 53.9, 34.9, 34.8, 30.7, 21.9, 21.1; IR (neat,  $\text{cm}^{-1}$ ) 2949, 2921, 2804, 1742, 1598, 1490, 1449, 1373, 1225, 1015, 950, 913, 759, 691, 659, 537; HRMS (ESI)  $m/z$ : calcd for  $\text{C}_{23}\text{H}_{25}\text{NO}_2$ :  $M+H = 348.1958$ ; found: 348.1950.

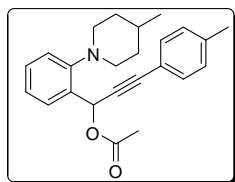

**1q** was obtained according to the above method. mp: 66-67 °C.  $^1\text{H}$  NMR (400 MHz,  $\text{CDCl}_3$ ):  $\delta$  7.78-7.79 (m, 1 H), 7.27-7.31 (m, 3 H), 7.19 (s, 1 H), 7.12-7.16 (m, 2 H), 7.02-7.04 (m, 2 H), 3.06-3.09 (m, 1 H), 2.94-2.97 (m, 1 H), 2.61-2.69 (m, 2 H), 2.26 (s, 3 H), 2.04 (s, 3 H), 1.65-1.67 (m, 2 H), 1.38-1.53 (m, 3 H), 0.97 (d,  $J = 5.2$  Hz, 3

H);  $^{13}\text{C}$  NMR (100 MHz,  $\text{CDCl}_3$ ):  $\delta$  169.3, 152.1, 138.4, 133.1, 131.6, 129.5, 128.9, 128.8, 124.2, 120.9, 119.3, 86.2, 85.9, 61.7, 54.3, 53.7, 34.8, 34.7, 21.8, 21.2, 20.8; IR (neat,  $\text{cm}^{-1}$ ) 2923, 2253, 1736, 1452, 1374, 1232, 1015, 952, 909, 818, 733, 650, 554; HRMS (ESI)  $m/z$ : calcd for  $\text{C}_{24}\text{H}_{27}\text{NO}_2$ :  $M+H = 362.2115$ ; found: 362.2122.

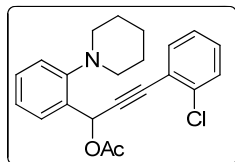

$^1\text{H}$  NMR (400 MHz,  $\text{CDCl}_3$ ):  $\delta$  7.85 (d,  $J = 1.2$  Hz, 1 H), 7.46 (dd,  $J = 5.6, 2.0$  Hz, 1 H), 7.31-7.35 (m, 2 H), 7.12-7.24 (m, 5 H), 2.78-2.89 (m, 4 H), 2.08 (s, 3 H), 1.66-1.78 (m, 4 H), 1.53-1.56 (m, 2 H);  $^{13}\text{C}$  NMR (100 MHz,  $\text{CDCl}_3$ ):  $\delta$  169.5, 152.6, 136.2, 133.4, 132.6, 129.8, 129.4, 129.2, 129.1, 126.2, 124.3, 122.4, 121.0, 92.1, 82.6, 61.7, 54.7, 26.4, 24.1, 20.9; IR (neat,  $\text{cm}^{-1}$ ) 2935, 2804, 1741, 1599, 1490, 1474, 1368, 1230, 1064, 1033, 1013, 951, 922, 757, 535.

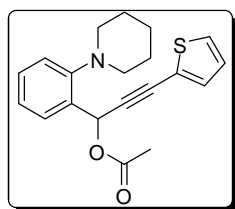

**1r** was obtained according to the above method as an oil.  $^1\text{H}$  NMR (400 MHz,  $\text{CDCl}_3$ ):  $\delta$  7.73-7.75 (m, 1 H), 7.31-7.36 (m, 1 H), 7.16-7.23 (m, 5 H), 6.92-6.94 (m, 1 H), 2.77-2.89 (m, 4 H), 2.09 (s, 3 H), 1.65-1.77 (m, 4 H), 1.53-1.56 (m, 2 H);  $^{13}\text{C}$  NMR (100 MHz,  $\text{CDCl}_3$ ):  $\delta$  169.6, 152.6, 132.8, 132.6, 129.8, 128.9, 127.4, 126.8, 124.4, 122.3, 121.2, 90.8, 79.1, 61.9, 54.8, 26.5, 24.2, 22.6, 21.0, 14.1; IR (neat,  $\text{cm}^{-1}$ ) 2928, 2853, 1736, 1218, 908, 760, 669, 539; HRMS (ESI)  $m/z$ : calcd for  $\text{C}_{20}\text{H}_{21}\text{NSO}_2$ :  $M+H = 340.1366$ ; found: 340.1377.

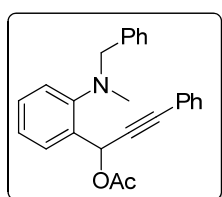

**1s**  $^1\text{H}$  NMR (300 MHz,  $\text{CDCl}_3$ ):  $\delta$  7.76-7.79 (m, 1 H), 7.18-7.43 (m, 14 H), 4.07 (s, 2 H), 2.62 (s, 3 H), 2.07 (s, 3 H);  $^{13}\text{C}$  NMR (75 MHz,  $\text{CDCl}_3$ ):  $\delta$  169.6, 151.6, 138.3, 133.5, 131.8, 129.6, 128.7, 128.6, 128.5, 128.3, 128.1, 127.1, 124.8, 122.3, 121.9, 86.9, 85.9, 61.9, 61.7, 42.6, 21.1; IR (neat,  $\text{cm}^{-1}$ ) 3061, 2948, 2845, 2796, 1741, 1446, 1373, 1224, 1015, 950, 759, 694, 564. HRMS (ESI)  $m/z$ : calcd for  $\text{C}_{25}\text{H}_{23}\text{NO}_2$ :  $M+H = 370.1802$ ; found: 370.1809.

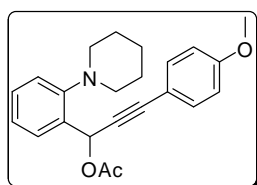

It was obtained according to the above method. mp: 66-67 °C.  $^1\text{H}$  NMR (400 MHz,  $\text{CDCl}_3$ ):  $\delta$  7.78-7.81 (m, 1 H), 7.32-7.41 (m, 3 H), 7.16-7.20 (m, 3 H), 6.79-6.83 (m, 2 H), 3.79 (s, 3 H), 2.78-2.89 (m, 4 H), 2.10 (s, 3 H), 1.67-1.78 (m, 4 H), 1.55-1.56 (m, 2 H);  $^{13}\text{C}$  NMR (100 MHz,  $\text{CDCl}_3$ ):  $\delta$  169.8, 159.7, 152.6, 133.4, 133.2, 129.7, 129.0, 124.3, 121.1, 114.5, 113.7, 85.9, 85.5, 61.9, 55.2, 54.8, 26.5, 24.2, 21.2; IR (neat,  $\text{cm}^{-1}$ ) 3017, 2936, 2847, 2802, 2225, 1738, 1604, 1509, 1448, 1372, 1288, 1239, 1175, 1109, 1031, 951, 833, 757, 664, 538; HRMS (ESI)  $m/z$ : calcd for  $\text{C}_{23}\text{H}_{25}\text{NO}_3$ :  $M+H = 364.1907$ ; found: 364.1901.

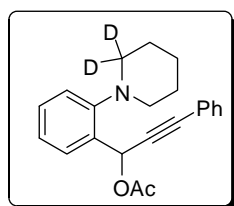

**D-1a** was obtained according to the above method as an oil.  $^1\text{H}$  NMR (300 MHz,  $\text{CDCl}_3$ ):  $\delta$  7.78-7.81 (m, 1 H), 7.43-7.46 (m, 2 H), 7.27-7.37 (m, 4 H), 7.19-7.26 (m, 3 H), 2.77-2.93 (m, 2 H), 2.10 (s, 3 H), 1.66-1.75 (m, 4 H), 1.53-1.64 (m, 2 H);  $^{13}\text{C}$  NMR (75 MHz,  $\text{CDCl}_3$ )  $\delta$  169.7, 152.6, 133.1, 131.8, 129.6, 129.0, 128.5, 128.1, 124.3, 122.4, 121.2, 86.9, 85.9, 61.8, 54.7, 26.5, 26.3, 24.1, 21.1;

**Characterization data of 2a-2o and D-2a.**

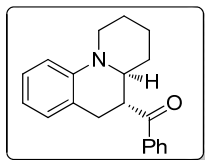

**2a** was obtained according to the above method as an oil. major diastereomer:  $^1\text{H}$  NMR (400 MHz,  $\text{CDCl}_3$ ):  $\delta$  7.98-8.00 (m, 2 H), 7.59 (t,  $J = 7.2$  Hz, 1 H), 7.46-7.49 (m, 2 H), 7.12 (t,  $J = 7.6$  Hz, 1 H), 6.94 (d,  $J = 7.2$  Hz, 1 H), 6.86 (d,  $J = 8.4$  Hz, 1 H), 6.65 (t,  $J = 7.2$  Hz, 1 H), 3.99-4.02 (m, 1 H), 3.71-3.78 (m, 1 H), 3.35-3.40 (m, 1 H), 2.96-3.03 (m, 1 H), 2.80-2.86 (m, 2 H), 1.71-1.77 (m, 3 H), 1.36-1.65 (m, 3 H);  $^{13}\text{C}$  NMR (100 MHz,  $\text{CDCl}_3$ ):  $\delta$  202.2, 146.1, 136.9, 133.3, 128.7, 128.6, 128.5, 128.3, 127.5, 123.1, 117.2, 112.9, 58.9, 48.5, 46.9, 32.4, 31.6, 25.4, 24.3; IR (neat,  $\text{cm}^{-1}$ ) 3399, 2920, 2852, 1677, 1585, 1450, 1057, 754, 705, 590; HRMS (ESI)  $m/z$ : calcd for  $\text{C}_{20}\text{H}_{21}\text{NO}$ :  $M+H = 292.1696$ ; found: 292.1694. minor diastereomer:  $^1\text{H}$  NMR (400 MHz,  $\text{CDCl}_3$ ):  $\delta$  7.93 (d,  $J = 7.2$  Hz, 2 H), 7.52-7.56 (m, 1 H), 7.43 (t,  $J = 8.0$  Hz, 2 H), 7.06-7.12 (m, 2 H), 6.65 (t,  $J = 7.2$  Hz, 1 H), 6.49 (d,  $J = 7.6$  Hz, 1 H), 3.84-3.89 (m, 1 H), 3.63-3.66 (m, 1 H), 3.38 (dd,  $J = 9.6, 8.0$  Hz, 1 H), 3.27-3.32 (m, 1 H), 3.03 (dd,  $J = 11.6, 6.0$  Hz, 1 H), 2.56-2.63 (m, 1 H), 1.84-1.86 (m, 1 H), 1.66-1.72 (m, 2 H), 1.34-1.59 (m, 3H);  $^{13}\text{C}$  NMR (100 MHz,  $\text{CDCl}_3$ ):  $\delta$  199.2, 151.5, 137.0, 133.1, 133.0, 128.5, 128.0, 127.7, 124.5, 118.1, 106.6, 67.5, 45.8, 39.1, 38.5, 26.3, 24.5, 24.4;

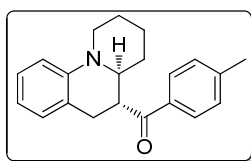

**2b** was obtained according to the above method as an oil. major diastereomer:  $^1\text{H}$  NMR (400 MHz,  $\text{CDCl}_3$ ):  $\delta$  7.90 (d,  $J = 8.0$  Hz, 2 H), 7.25-7.29 (m, 2 H), 7.12 (t,  $J = 7.6$  Hz, 1 H), 6.94 (d,  $J = 7.2$  Hz, 1 H), 6.86 (d,  $J = 8.4$  Hz, 1 H), 6.65 (t,  $J = 7.6$  Hz, 1 H), 3.99-4.02 (m, 1 H), 3.69-3.75 (m, 1 H), 3.32-3.38 (m, 1 H), 2.96-3.02 (m, 1 H), 2.78-2.86 (m, 2 H), 2.42 (s, 3 H), 1.71-1.77 (m, 3 H), 1.56-1.62 (m, 1 H), 1.26-1.47 (m, 2 H);  $^{13}\text{C}$  NMR (100 MHz,  $\text{CDCl}_3$ ):  $\delta$  201.8, 146.1, 144.2, 134.6, 129.5, 128.7, 128.5, 127.5, 123.2, 117.2, 112.9, 58.9, 48.5, 46.9, 32.6, 31.6, 25.5, 24.3, 21.6; IR (neat,  $\text{cm}^{-1}$ ) 3434, 2925, 2852, 1673, 1604, 1494, 1451, 1377, 1255, 1225, 1177, 1113, 1061, 747, 574; HRMS (ESI)  $m/z$ : calcd for  $\text{C}_{21}\text{H}_{23}\text{NO}$ :  $M+H = 306.1852$ ; found: 306.1848.

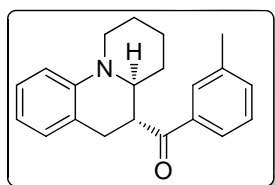

**2c** was obtained according to the above method as an oil. major diastereomer:  $^1\text{H}$  NMR (400 MHz,  $\text{CDCl}_3$ ):  $\delta$  7.78-7.80 (m, 2 H), 7.34-7.41 (m, 2 H), 7.12 (t,  $J = 7.6$  Hz, 1 H), 6.94 (d,  $J = 7.2$  Hz, 1 H), 6.86 (d,  $J = 8.4$  Hz, 1 H), 6.65 (t,  $J = 7.2$  Hz, 1 H), 3.99-4.02 (m, 1 H), 3.71-3.77 (m, 1 H), 3.33-3.39 (m, 1 H), 2.95-3.02 (m, 1 H),

2.79-2.86 (m, 2 H), 2.41 (s, 3 H), 1.71-1.77 (m, 3 H), 1.55-1.65 (m, 1 H), 1.23-1.49 (m, 2 H);  $^{13}\text{C}$  NMR (100 MHz,  $\text{CDCl}_3$ ):  $\delta$  202.5, 146.1, 138.6, 137.1, 134.1, 128.9, 128.7, 128.6, 127.5, 125.6, 123.2, 117.2, 112.9, 58.9, 48.5, 47.1, 32.6, 31.6, 25.5, 24.3, 21.3; IR (neat,  $\text{cm}^{-1}$ ) 3336, 2929, 2851, 1675, 1601, 1494, 1451, 1370, 1253, 1161, 1050, 744, 550; HRMS (ESI)  $m/z$ : calcd for  $\text{C}_{21}\text{H}_{23}\text{NO}$ :  $M+H = 306.1852$ ; found: 306.1850.

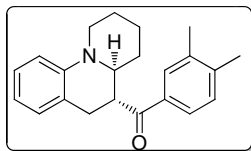

**2d** was obtained according to the above method as an oil. major diastereomer:  $^1\text{H}$  NMR (400 MHz,  $\text{CDCl}_3$ ):  $\delta$  7.73-7.77 (m, 2 H), 7.14-7.26 (m, 1 H), 7.10-7.14 (m, 1 H), 6.94 (d,  $J = 7.6$  Hz, 1 H), 6.87 (d,  $J = 8.4$  Hz, 1 H), 6.63-6.67 (m, 1 H), 3.99-4.03 (m, 1 H), 3.69-3.76 (m, 1 H), 3.32-3.37 (m, 1 H), 2.96-3.02 (m, 1 H), 2.77-2.86 (m, 2 H), 2.33 (s, 3 H), 2.32 (s, 3 H), 1.71-1.77 (m, 3 H), 1.56-1.62 (m, 1 H), 1.24-1.47 (m, 2 H);  $^{13}\text{C}$  NMR (100 MHz,  $\text{CDCl}_3$ ):  $\delta$  202.1, 146.1, 143.0, 137.2, 135.0, 130.0, 129.5, 128.8, 127.4, 126.1, 123.3, 117.1, 112.9, 59.0, 48.5, 46.8, 32.6, 31.6, 25.6, 24.3, 20.0, 19.8; IR (neat,  $\text{cm}^{-1}$ ) 3400, 2923, 2851, 1671, 1602, 1494, 1451, 1378, 1253, 1115, 1054, 793, 749, 708; HRMS (ESI)  $m/z$ : calcd for  $\text{C}_{22}\text{H}_{25}\text{NO}$ :  $M+H = 320.2009$ ; found: 320.2006.

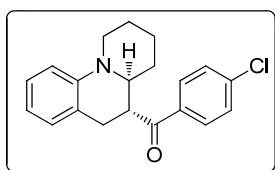

**2e** was obtained according to the above method as an oil. major diastereomer:  $^1\text{H}$  NMR (400 MHz,  $\text{CDCl}_3$ ):  $\delta$  7.91-7.94 (m, 2 H), 7.44-7.46 (m, 2 H), 7.12 (t,  $J = 7.6$  Hz, 1 H), 6.93 (d,  $J = 7.6$  Hz, 1 H), 6.85 (d,  $J = 8.4$  Hz, 1 H), 6.66 (t,  $J = 7.2$  Hz, 1 H), 3.98-4.01 (m, 1 H), 3.65-3.71 (m, 1 H), 3.32-3.38 (m, 1 H), 2.95-3.01 (m, 1 H), 2.78-2.86 (m, 2 H), 1.55-1.76 (m, 4 H), 1.38-1.49 (m, 1 H), 1.19-1.29 (m, 1 H);  $^{13}\text{C}$  NMR (100 MHz,  $\text{CDCl}_3$ ):  $\delta$  200.9, 146.0, 139.9, 135.3, 129.7, 129.1, 128.7, 127.6, 122.9, 117.3, 112.9, 58.8, 48.5, 47.1, 32.3, 31.6, 25.4, 24.3; IR (neat,  $\text{cm}^{-1}$ ) 3436, 2929, 2851, 1677, 1590, 1493, 1451, 1253, 1092, 1008, 839, 747, 534; HRMS (ESI)  $m/z$ : calcd for  $\text{C}_{20}\text{H}_{20}\text{ClNO}$ :  $M+H = 326.1306$ ; found: 326.1301.

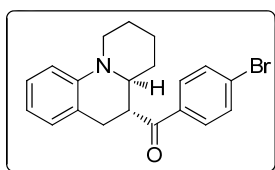

**2f** was obtained according to the above method as an oil. major diastereomer:  $^1\text{H}$  NMR (400 MHz,  $\text{CDCl}_3$ ):  $\delta$  7.84 (d,  $J = 8.4$  Hz, 2 H), 7.62 (d,  $J = 8.4$  Hz, 2 H), 7.12

(t,  $J = 7.6$  Hz, 1 H), 6.93 (d,  $J = 7.6$  Hz, 1 H), 6.85 (d,  $J = 8.4$  Hz, 1 H), 6.65 (t,  $J = 7.2$  Hz, 1 H), 3.98-4.01 (m, 1 H), 3.64-3.69 (m, 1 H), 3.33-3.38 (m, 1 H), 2.95-3.01 (m, 1 H), 2.78-2.86 (m, 2 H), 1.56-1.76 (m, 4 H), 1.20-1.49 (m, 2 H);  $^{13}\text{C}$  NMR (100 MHz,  $\text{CDCl}_3$ ):  $\delta$  201.1, 146.0, 135.7, 132.1, 129.8, 128.7, 128.6, 127.6, 122.9, 117.3, 112.9, 58.8, 48.5, 47.1, 32.3, 31.6, 25.4, 24.3; IR (neat,  $\text{cm}^{-1}$ ) 3403, 2923, 2853, 1764, 1681, 1452, 1381, 1243, 1061, 913, 746; HRMS (ESI)  $m/z$ : calcd for  $\text{C}_{20}\text{H}_{20}\text{NOBr}$ :  $M+H = 370.0801$ ; found: 370.0806.

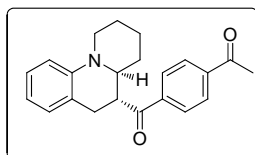

**2g** was obtained according to the above method as an oil. major diastereomer:  $^1\text{H}$  NMR (400 MHz,  $\text{CDCl}_3$ ):  $\delta$  8.05 (m, 4 H), 7.13 (t,  $J = 7.6$  Hz, 1 H), 6.94 (d,  $J = 7.2$  Hz, 1 H), 6.86 (d,  $J = 8.4$  Hz, 1 H), 6.66 (t,  $J = 7.2$  Hz, 1 H), 3.99-4.02 (m, 1 H), 3.72-3.78 (m, 1 H), 3.35-3.41 (m, 1 H), 2.96-3.03 (m, 1 H), 2.80-2.86 (m, 2 H), 2.65 (s, 3 H), 1.73-1.79 (m, 3 H), 1.28-1.69 (m, 3 H);  $^{13}\text{C}$  NMR (100 MHz,  $\text{CDCl}_3$ ):  $\delta$  201.7, 197.4, 146.0, 140.2, 140.1, 128.7, 128.6, 128.5, 127.6, 122.8, 117.3, 113.0, 58.8, 48.5, 47.6, 32.2, 31.6, 26.9, 25.3, 24.3; IR (neat,  $\text{cm}^{-1}$ ) 2927, 2852, 1683, 1601, 1495, 1259, 910, 748; HRMS (ESI)  $m/z$ : calcd for  $\text{C}_{22}\text{H}_{23}\text{NO}_2$ :  $M+H = 334.1802$ ; found: 334.1812.

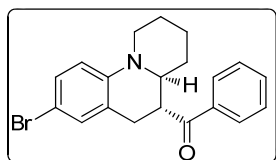

**2h** was obtained according to the above method as an oil. major diastereomer:  $^1\text{H}$  NMR (400 MHz,  $\text{CDCl}_3$ ):  $\delta$  7.96-7.98 (m, 2 H), 7.59 (t,  $J = 7.2$  Hz, 1 H), 7.47-7.50 (m, 2 H), 7.17-7.19 (m, 1 H), 7.03 (d,  $J = 2.0$  Hz, 1 H), 6.69 (d,  $J = 8.8$  Hz, 1H); 3.89-3.93 (m, 1 H), 3.67-3.72 (m, 1 H), 3.34-3.39 (m, 1 H), 2.91-2.97 (m, 1 H), 2.76-2.86 (m, 2 H), 1.70-1.79 (m, 3 H), 1.54-1.63 (m, 1 H), 1.39-1.49 (m, 1 H), 1.20-1.30 (m, 1 H);  $^{13}\text{C}$  NMR (100 MHz,  $\text{CDCl}_3$ ):  $\delta$  201.6, 145.1, 136.8, 133.4, 130.9, 130.1, 128.8, 128.3, 125.3, 114.5, 108.8, 58.7, 48.4, 46.8, 31.8, 31.5, 25.2, 24.2; IR (neat,  $\text{cm}^{-1}$ ) 3436, 2927, 2851, 1676, 1592, 1489, 1445, 1370, 1254, 1219, 793, 705, 546; HRMS (ESI)  $m/z$ : calcd for  $\text{C}_{20}\text{H}_{20}\text{NOBr}$ :  $M+H = 370.0801$ ; found: 370.0795.

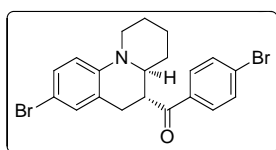

**2i** was obtained according to the above method as an oil. major diastereomer:  $^1\text{H}$  NMR (400 MHz,  $\text{CDCl}_3$ ):  $\delta$  7.83 (d,  $J = 8.4$  Hz, 2 H), 7.63 (d,  $J = 8.8$  Hz, 2 H),

7.17-7.19 (m, 1 H), 7.03 (d,  $J = 2.0$  Hz, 1 H), 6.69 (d,  $J = 8.8$  Hz, 1 H), 3.89-3.93 (m, 1 H), 3.60-3.66 (m, 1 H), 3.31-3.36 (m, 1 H), 2.90-2.97 (m, 1 H), 2.74-2.85 (m, 2 H), 1.66-1.79 (m, 3 H), 1.28-1.63 (m, 3 H);  $^{13}\text{C}$  NMR (100 MHz,  $\text{CDCl}_3$ ):  $\delta$  200.6, 145.0, 135.4, 132.2, 130.9, 130.1, 129.8, 128.8, 125.0, 114.5, 108.9, 58.7, 48.4, 46.8, 31.7, 31.5, 25.1, 24.2; IR (neat,  $\text{cm}^{-1}$ ) 3433, 2923, 2851, 1764, 1676, 1584, 1488, 1387, 1251, 1066, 1009, 746; HRMS (ESI)  $m/z$ : calcd for  $\text{C}_{20}\text{H}_{19}\text{NOBr}_2$ :  $M+H = 447.9906$ ; found: 447.9914.

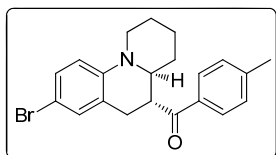

**2j** was obtained according to the above method as an oil. major diastereomer:  $^1\text{H}$  NMR (400 MHz,  $\text{CDCl}_3$ ):  $\delta$  7.88 (d,  $J = 8.4$  Hz, 2 H), 7.29 (d,  $J = 8.0$  Hz, 2 H), 7.18 (dd,  $J = 6.8, 2.0$  Hz, 1 H), 7.03 (d,  $J = 2.0$  Hz, 1 H), 6.70 (d,  $J = 8.8$  Hz, 1 H), 3.90-3.93 (m, 1 H), 3.64-3.70 (m, 1 H), 3.32-3.38 (m, 1 H), 2.91-2.98 (m, 1 H), 2.74-2.86 (m, 2 H), 2.43 (s, 3 H), 1.69-1.79 (m, 3 H), 1.26-1.59 (m, 3 H);  $^{13}\text{C}$  NMR (100 MHz,  $\text{CDCl}_3$ ):  $\delta$  201.2, 145.2, 144.4, 134.4, 130.9, 130.1, 129.5, 128.5, 125.4, 114.5, 108.8, 58.8, 48.5, 46.7, 31.9, 31.5, 25.2, 24.2, 21.6; IR (neat,  $\text{cm}^{-1}$ ) 3400, 2922, 2852, 2332, 1764, 1674, 1489, 1380, 1248, 1058, 913, 771, 747, 669; HRMS (ESI)  $m/z$ : calcd for  $\text{C}_{21}\text{H}_{22}\text{NOBr}$ :  $M+H = 384.0958$ ; found: 384.0962.

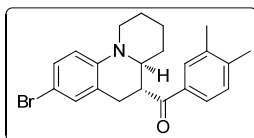

**2k** was obtained according to the above method as an oil. major diastereomer:  $^1\text{H}$  NMR (400 MHz,  $\text{CDCl}_3$ ):  $\delta$  7.67-7.76 (m, 2 H), 7.10-7.25 (m, 3 H), 6.28-6.34 (m, 1 H), 3.81-3.87 (m, 1 H), 3.59-3.56 (m, 1 H), 3.23-3.37 (m, 2 H), 2.95-3.01 (m, 1 H), 2.57-2.64 (m, 1 H), 2.32 (s, 3 H), 2.31 (s, 3 H), 1.83-1.85 (m, 1 H), 1.31-1.69 (m, 5 H);  $^{13}\text{C}$  NMR (100 MHz,  $\text{CDCl}_3$ ):  $\delta$  198.5, 150.5, 142.7, 136.9, 135.6, 134.7, 130.2, 129.9, 129.8, 129.2, 127.5, 127.1, 125.8, 125.7, 109.5, 107.8, 67.5, 45.7, 38.9, 38.1, 26.0, 24.2, 24.1, 20.0, 19.8; IR (neat,  $\text{cm}^{-1}$ ) 2930, 2852, 1679, 1602, 1477, 1448, 1382, 1249, 1122, 803; HRMS (ESI)  $m/z$ : calcd for  $\text{C}_{22}\text{H}_{24}\text{BrNO}$ :  $M+H = 398.1114$ ; found: 398.1111.



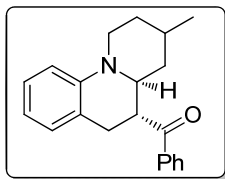

**2l** was obtained according to the above method as an oil. major diastereomer:  $^1\text{H}$  NMR (400 MHz,  $\text{CDCl}_3$ ):  $\delta$  7.99-8.01 (m, 2 H), 7.59 (t,  $J = 7.6$  Hz, 1 H), 7.49 (t,  $J = 7.6$  Hz, 2 H), 7.12 (t,  $J = 7.8$  Hz, 1 H), 6.94 (d,  $J = 7.2$  Hz, 1 H), 6.86 (d,  $J = 8.4$  Hz, 1 H), 6.65 (t,  $J = 7.2$  Hz, 1 H), 3.99-4.04 (m, 1 H), 3.70-3.76 (m, 1 H), 3.38-3.43 (m, 1 H), 2.94-3.00 (m, 1 H), 2.81-2.88 (m, 2 H), 1.70-1.76 (m, 2 H), 1.21-1.64 (m, 3 H), 0.87 (d,  $J = 6.4$  Hz, 3 H);  $^{13}\text{C}$  NMR (100 MHz,  $\text{CDCl}_3$ ):  $\delta$  202.2, 145.9, 136.9, 133.3, 128.8, 128.6, 128.4, 127.5, 123.1, 117.2, 112.9, 58.3, 48.0, 47.1, 39.9, 33.8, 32.6, 30.9, 21.9; IR (neat,  $\text{cm}^{-1}$ ) 3440, 2923, 2849, 1677, 1600, 1495, 1452, 1373, 1239, 1210, 750, 702, 665; HRMS (ESI)  $m/z$ : calcd for  $\text{C}_{21}\text{H}_{23}\text{NO}$ :  $M+H = 306.1852$ ; found: 306.1855.

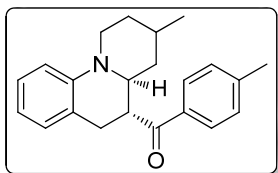

**2m** was obtained according to the above method as an oil. major diastereomer:  $^1\text{H}$  NMR (400 MHz,  $\text{CDCl}_3$ ):  $\delta$  7.89-7.92 (m, 2 H), 7.25-7.30 (m, 2 H), 7.12 (t,  $J = 7.8$  Hz, 1 H), 6.94 (d,  $J = 7.2$  Hz, 1 H), 6.86 (d,  $J = 8.4$  Hz, 1 H), 6.65 (t,  $J = 7.2$  Hz, 1 H), 3.99-4.04 (m, 1 H), 3.68-3.74 (m, 1 H), 3.36-3.41 (m, 1 H), 2.94-3.01 (m, 1 H), 2.79-2.88 (m, 2 H), 2.43 (s, 3 H), 1.69-1.77 (m, 2 H), 1.53-1.63 (m, 2 H), 1.24-1.28 (m, 1 H), 0.87 (d,  $J = 6.4$  Hz, 3 H);  $^{13}\text{C}$  NMR (100 MHz,  $\text{CDCl}_3$ ):  $\delta$  201.8, 145.9, 144.3, 134.5, 129.5, 128.7, 128.5, 127.5, 123.2, 117.2, 112.9, 58.4, 48.1, 46.9, 39.9, 33.9, 32.7, 30.9, 21.9, 21.6; IR (neat,  $\text{cm}^{-1}$ ) 3399, 2019, 2850, 1672, 1603, 1494, 1453, 1374, 1241, 1045, 748, 610; HRMS (ESI)  $m/z$ : calcd for  $\text{C}_{22}\text{H}_{25}\text{NO}$ :  $M+H = 320.2009$ ; found: 320.2001.

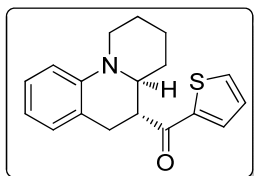

**2n** was obtained according to the above method as an oil. major diastereomer:  $^1\text{H}$  NMR (400 MHz,  $\text{CDCl}_3$ ):  $\delta$  7.77 (d,  $J = 3.6$  Hz, 1 H), 7.68 (d,  $J = 4.8$  Hz, 1 H), 7.10-7.17 (m, 2 H), 6.96 (d,  $J = 7.2$  Hz, 1 H), 6.87 (d,  $J = 8.4$  Hz, 1 H), 6.67 (t,  $J = 7.2$  Hz, 1 H), 3.99-4.02 (m, 1 H), 3.50-3.56 (m, 1 H), 3.28-3.34 (m, 1 H), 3.05-3.12 (m, 1 H), 2.78-2.87 (m, 2 H), 1.76-1.78 (m, 3 H), 1.57-1.66 (m, 1 H), 1.28-1.47 (m, 2 H);  $^{13}\text{C}$  NMR (100 MHz,  $\text{CDCl}_3$ ):  $\delta$  194.9, 146.1, 144.9, 134.5, 132.2, 128.6, 128.4, 127.5, 123.0, 117.3, 113.1, 58.8, 49.1, 48.5, 32.6, 31.6, 25.5, 24.1; IR (neat,  $\text{cm}^{-1}$ ) 3399, 2925, 2851, 1653, 1494, 1413, 1253, 1057, 789, 744, 661; HRMS (ESI)  $m/z$ : calcd for

C<sub>18</sub>H<sub>19</sub>NOS: M+H = 298.1260; found:298.1254.

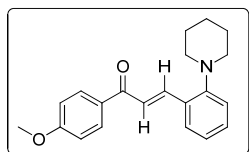

**2o** <sup>1</sup>H NMR (400 MHz, CDCl<sub>3</sub>): δ 8.17 (d, *J* = 15.6 Hz, 1 H), 8.05 (d, *J* = 8.8 Hz, 2 H), 7.66 (d, *J* = 8.4 Hz, 1 H), 7.52 (d, *J* = 16.0 Hz, 1 H), 7.32-7.37 (m, 1 H), 7.05 (d, *J* = 7.6 Hz, 2 H), 6.98 (d, *J* = 8.8 Hz, 2 H), 3.89 (s, 3 H), 2.91-2.94 (m, 4 H), 1.73-1.78 (m, 4 H), 1.57-1.60 (m, 2 H); <sup>13</sup>C NMR (100 MHz, CDCl<sub>3</sub>): δ 189.4, 163.2, 154.4, 142.0, 131.4, 130.9, 130.8, 130.7, 129.2, 127.9, 122.3, 121.4, 119.0, 113.7, 113.6, 55.4, 54.4, 26.4, 24.2; IR (neat, cm<sup>-1</sup>): 2928, 1655, 1599, 1449, 1380, 1332, 1257, 1219, 1167, 1021, 835, 757, 575; HRMS (ESI) *m/z*: calcd for C<sub>21</sub>H<sub>23</sub>NO<sub>2</sub>: M+H = 322.1802; found:322.1808.

**D-2a** <sup>1</sup>H NMR (400 MHz, CDCl<sub>3</sub>): δ 7.99 (d, *J* = 7.2 Hz, 2 H), 7.59 (t, *J* = 7.6 Hz, 1 H), 7.49 (t, *J* = 8.0 Hz, 2 H), 7.13 (t, *J* = 7.6 Hz, 1 H), 6.94 (d, *J* = 7.2 Hz, 1 H), 6.86 (d, *J* = 8.0 Hz, 1 H), 6.65 (t, *J* = 7.2 Hz, 1 H), 3.99-4.02 (m, 0.3 H), 3.71-3.78 (m, 1 H), 3.35-3.40 (m, 0.7 H), 2.96-3.03 (m, 1 H), 2.80-2.88 (m, 1.2 H), 1.38-1.79 (m, 6 H); <sup>13</sup>C NMR (100 MHz, CDCl<sub>3</sub>): δ 202.2, 146.1, 137.1, 133.3, 128.8, 128.7, 128.4, 127.5, 123.1, 117.2, 112.9, 58.9, 47.1, 32.5, 31.6, 25.3, 24.3; HRMS (ESI) *m/z*: calcd for C<sub>20</sub>H<sub>19</sub>NOD<sub>2</sub>: M+H = 294.1821; found:294.1825.

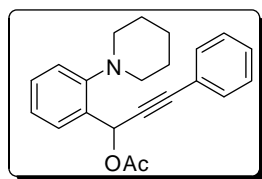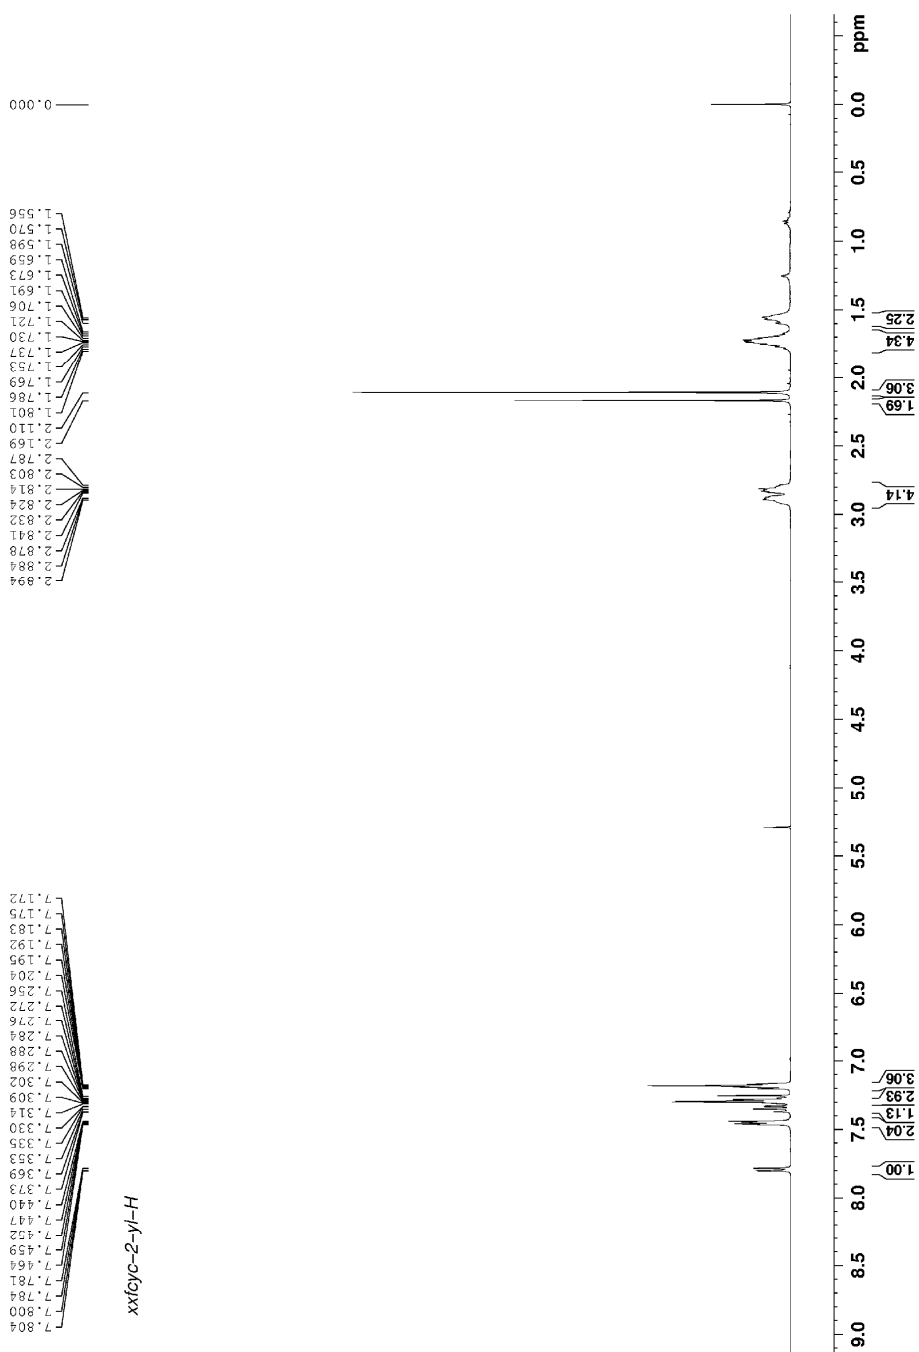

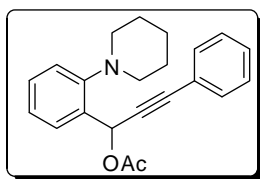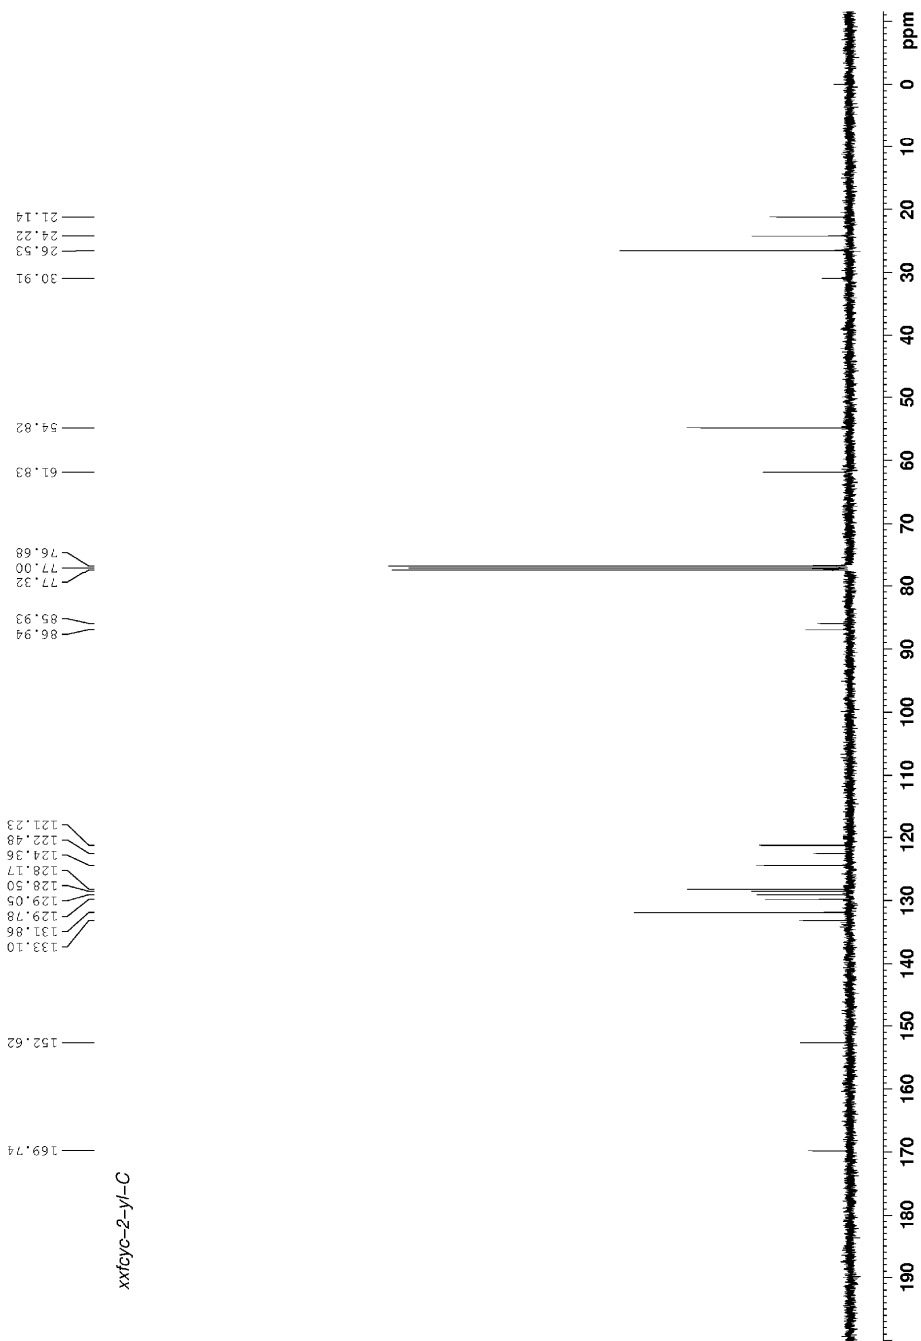

xxfeyc-2-yf-C



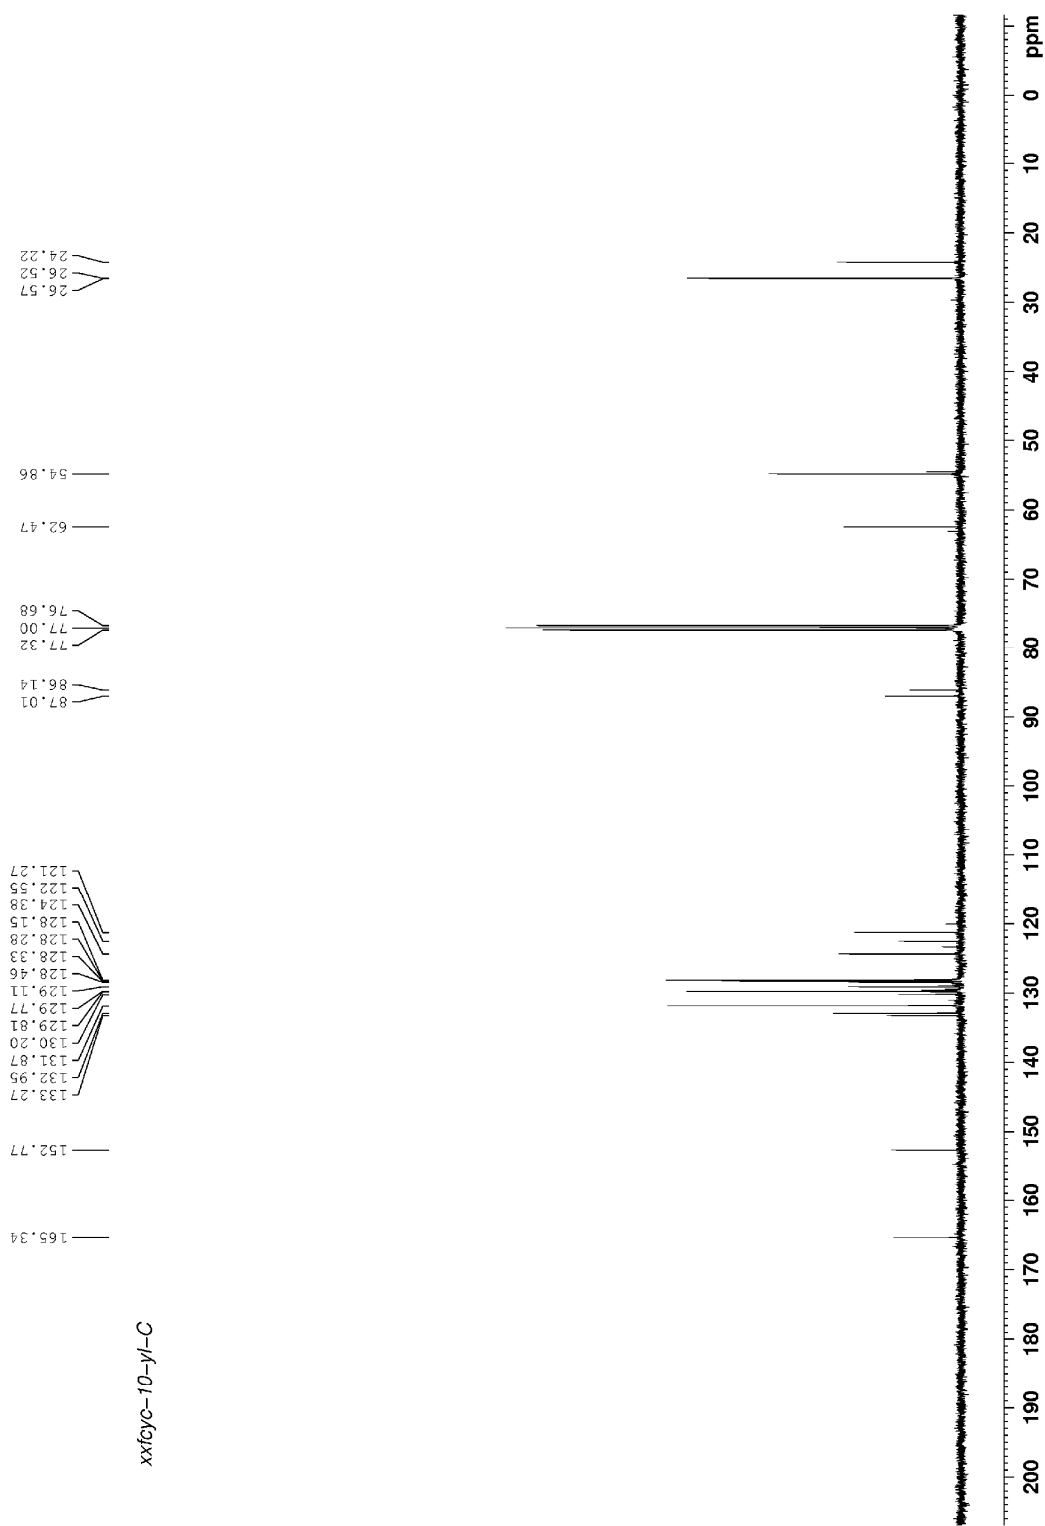

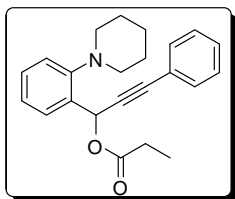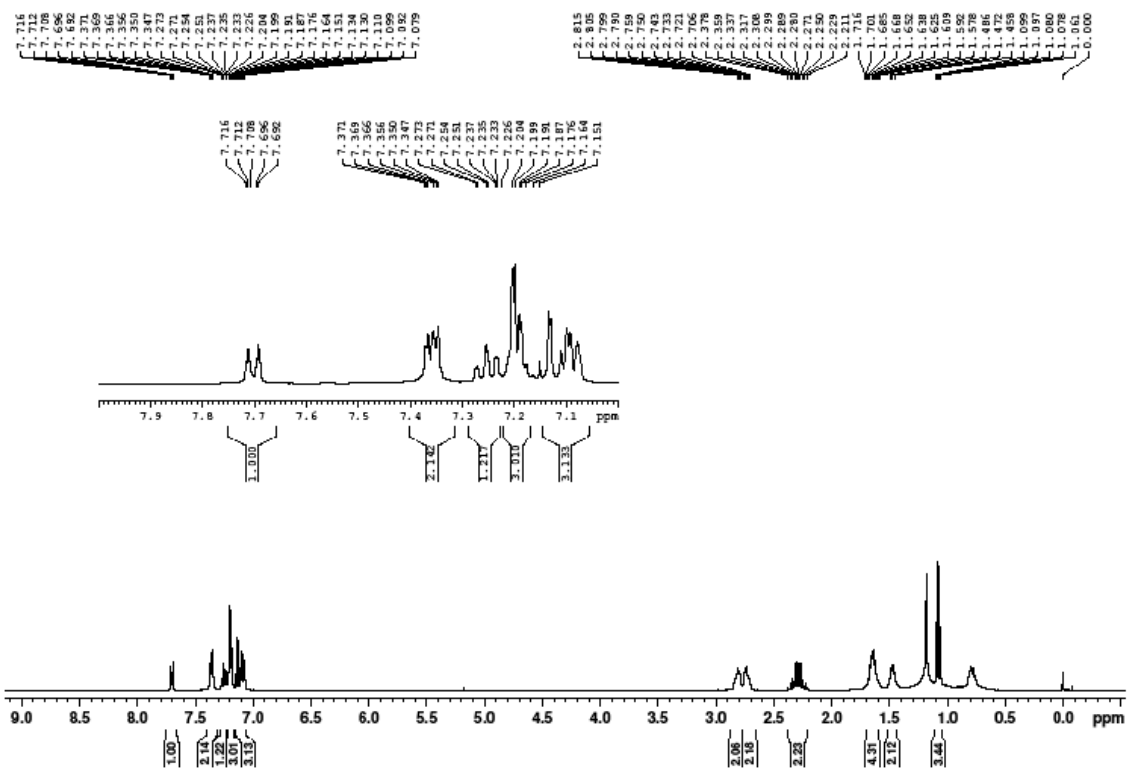

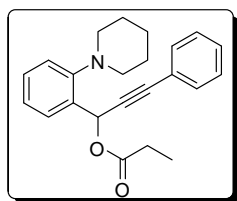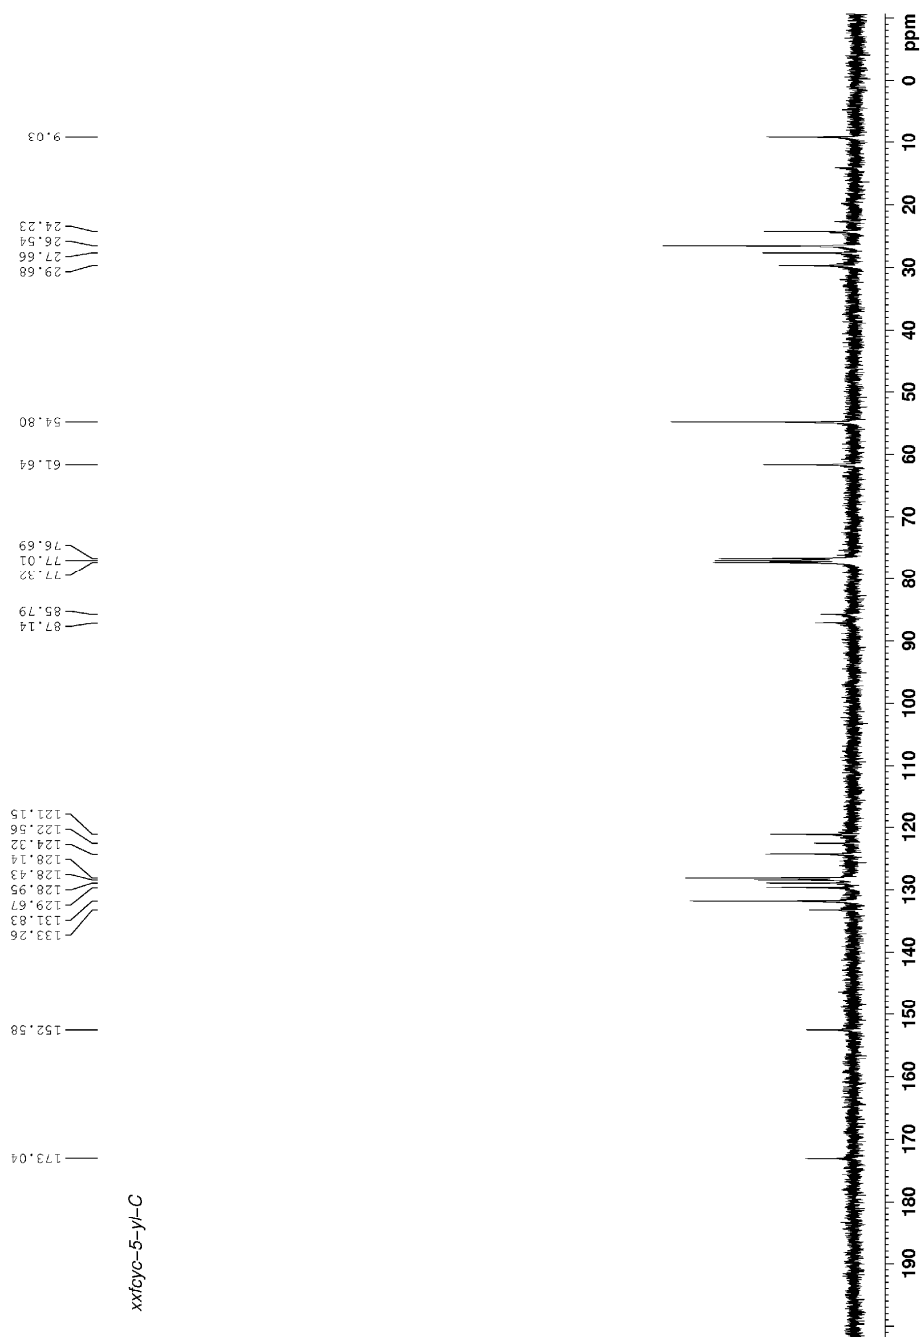









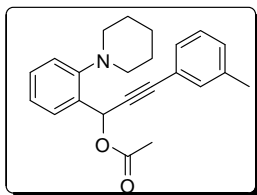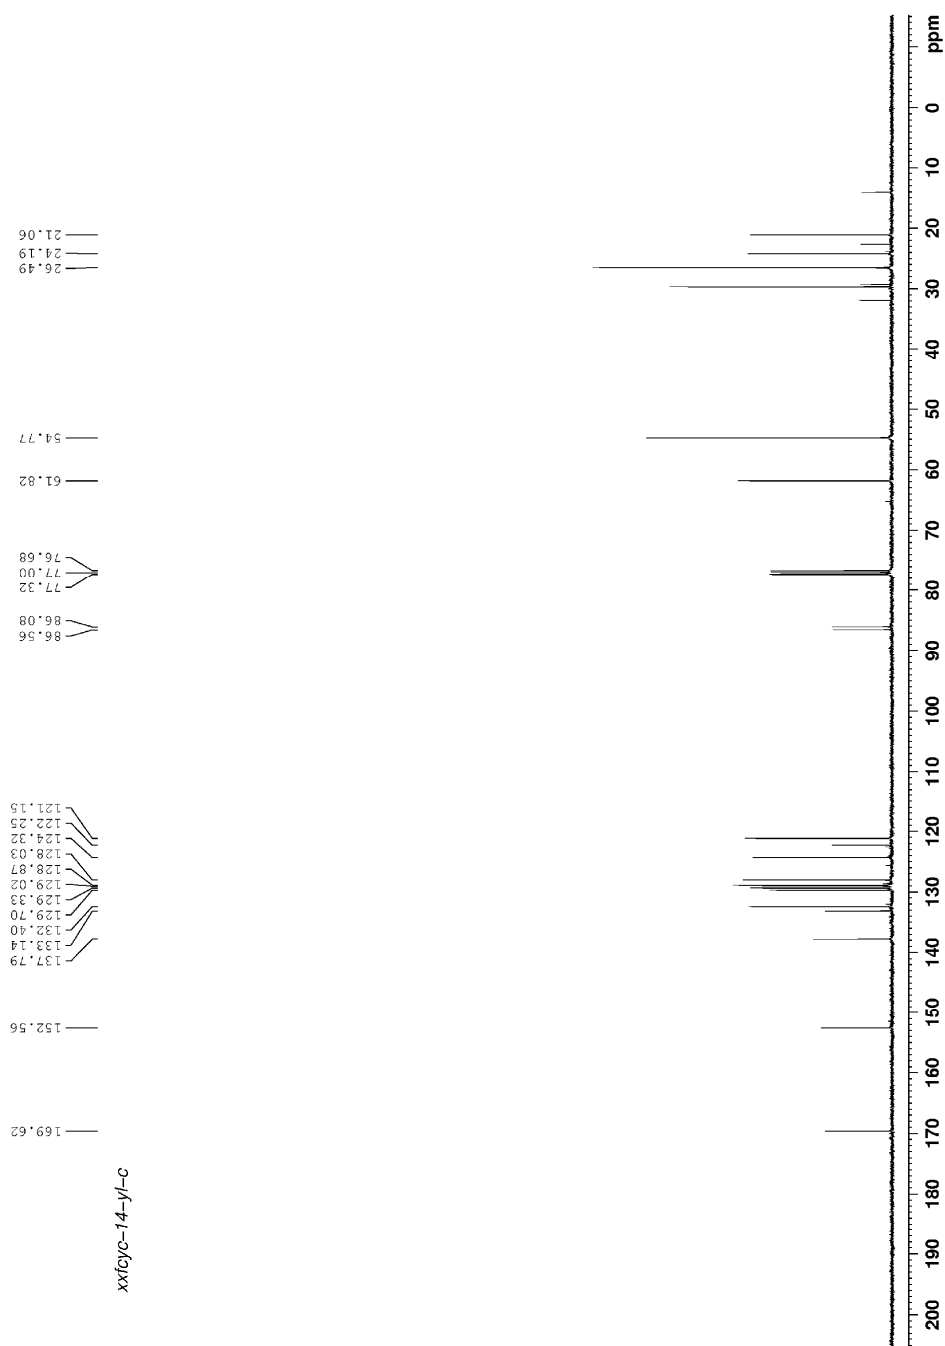

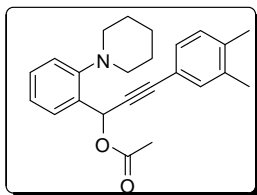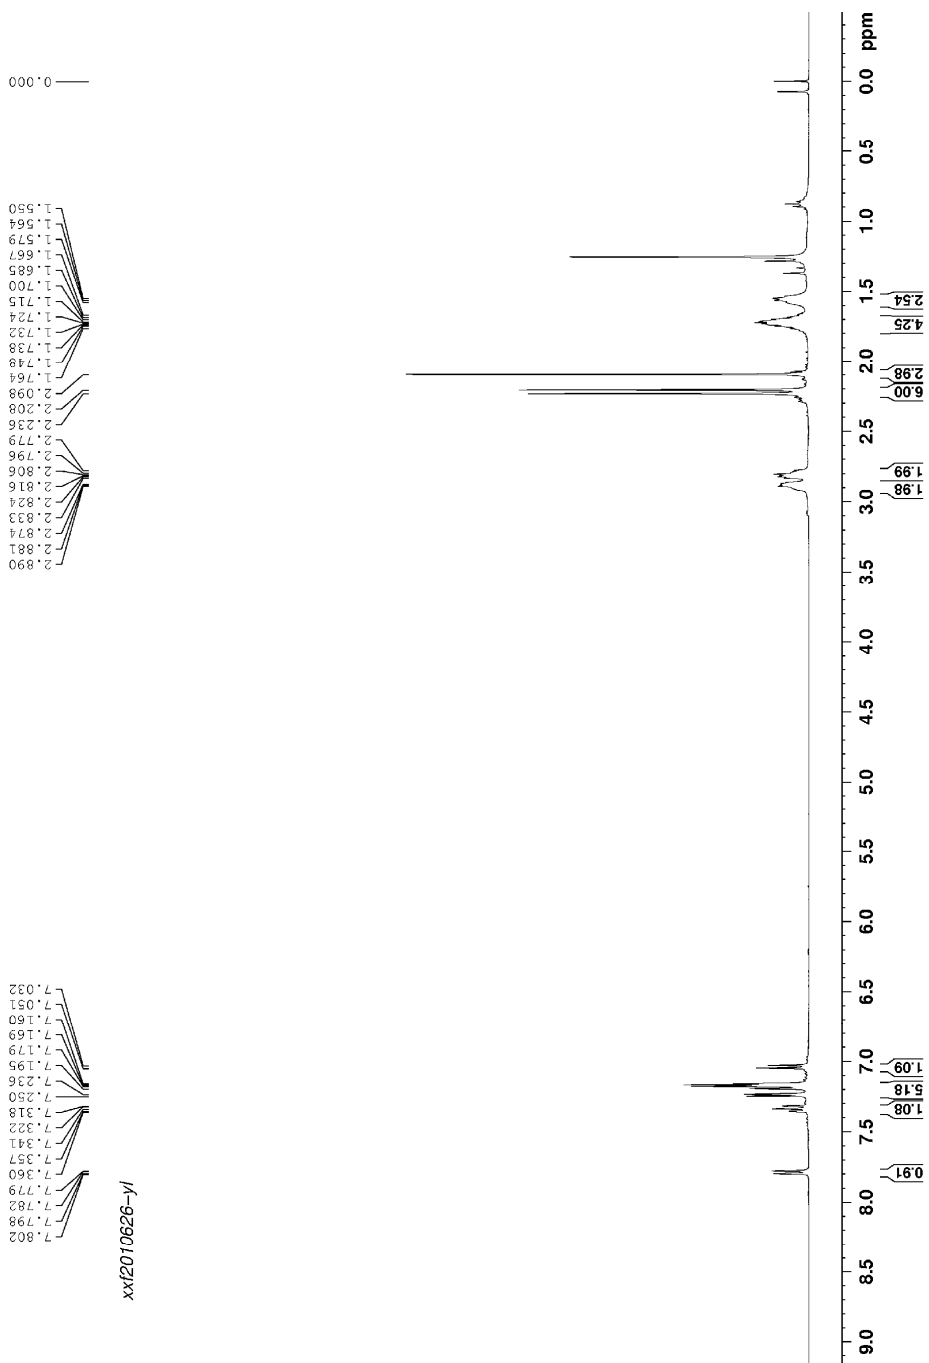

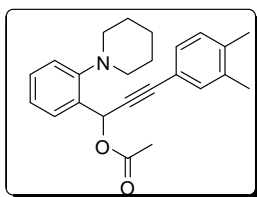

26.53  
24.24  
21.15  
19.72  
19.47

61.95  
54.81

86.26  
85.96  
77.32  
77.00  
76.68

137.41  
136.48  
133.29  
132.92  
129.69  
129.47  
129.30  
129.08  
124.33  
121.16  
119.69

152.60

169.74

xxi2010626-y-3,4-methyl-C

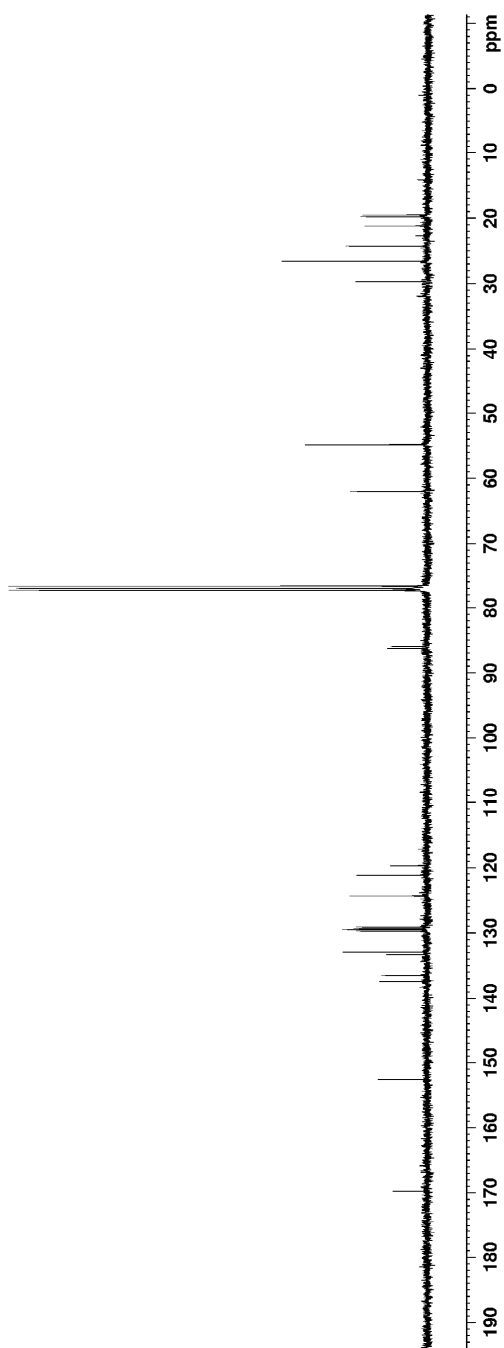

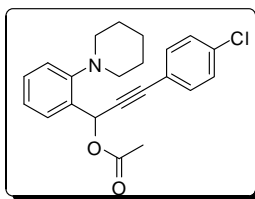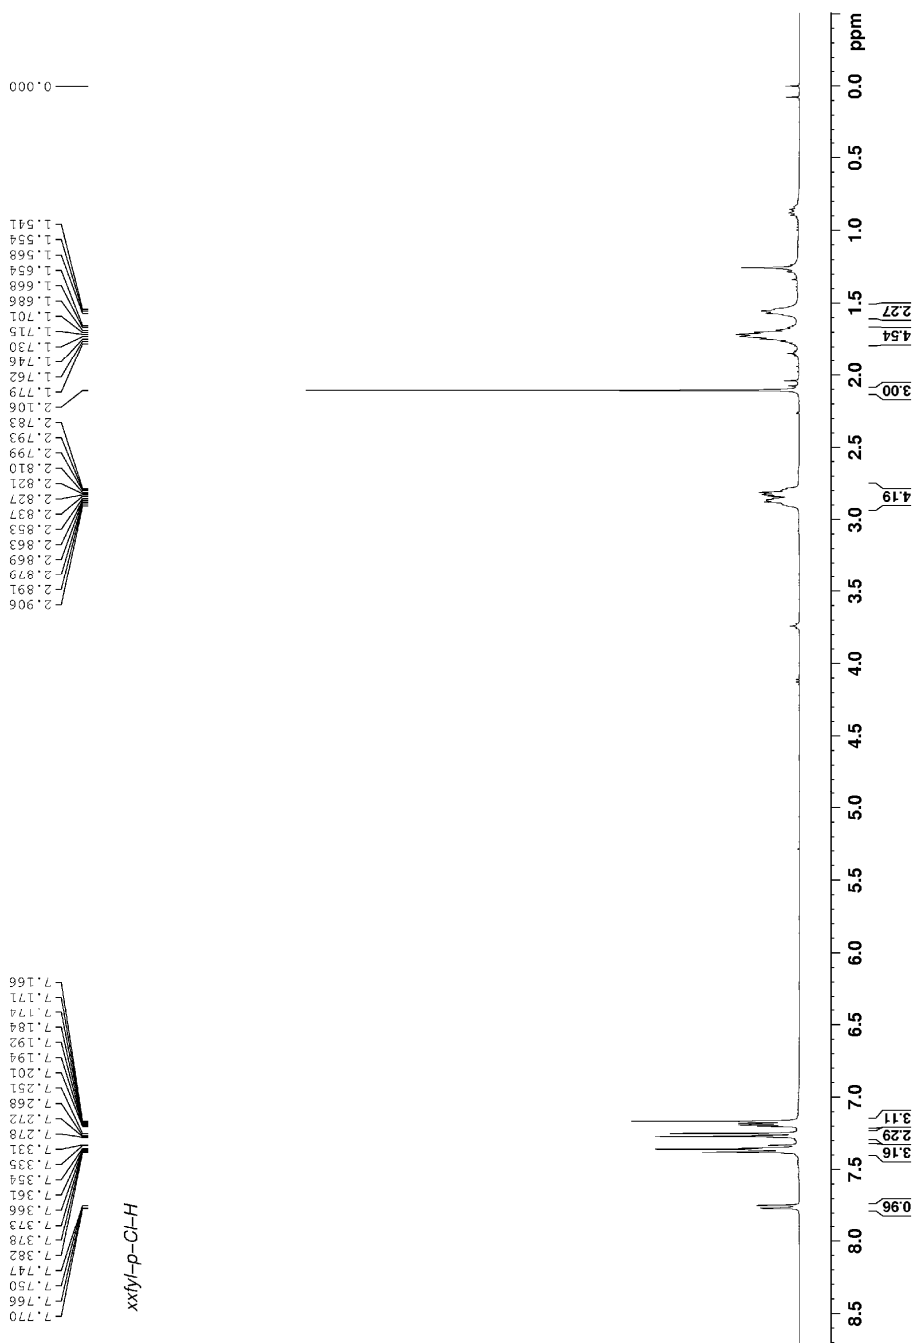

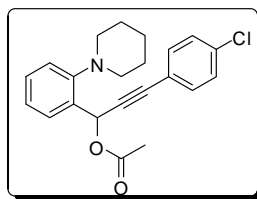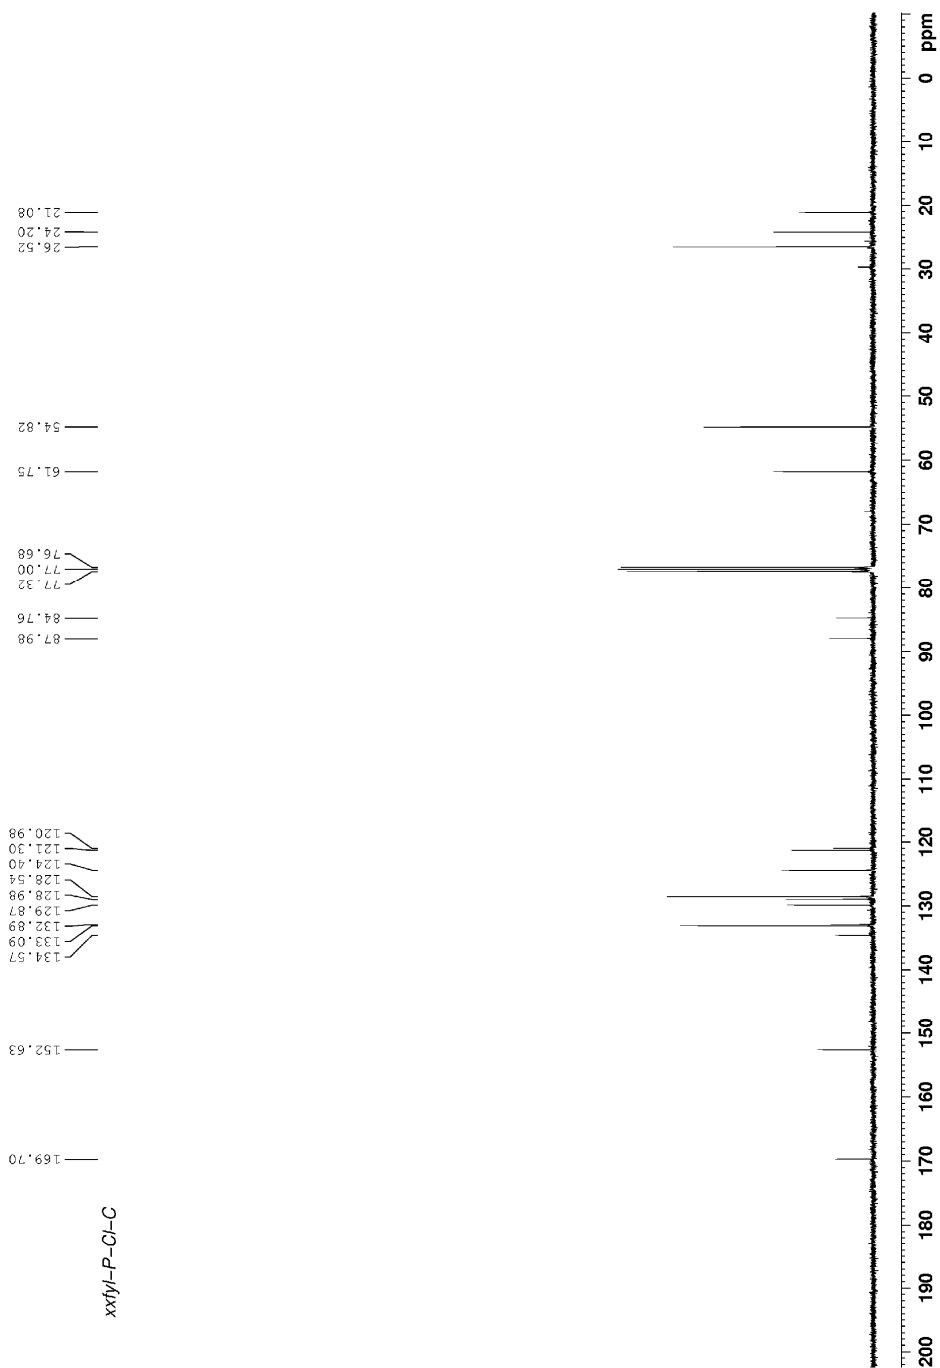



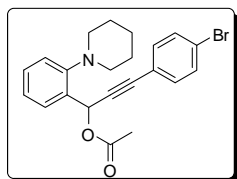

0.000

1.551  
1.564  
1.665  
1.683  
1.698  
1.712  
1.727  
1.742  
1.759  
1.775  
2.106  
2.780  
2.796  
2.807  
2.823  
2.833  
2.859  
2.874

7.161  
7.168  
7.185  
7.189  
7.202  
7.246  
7.291  
7.313  
7.332  
7.336  
7.354  
7.370  
7.374  
7.408  
7.425  
7.429  
7.749  
7.768  
7.771

xx1201114-P-Br-H

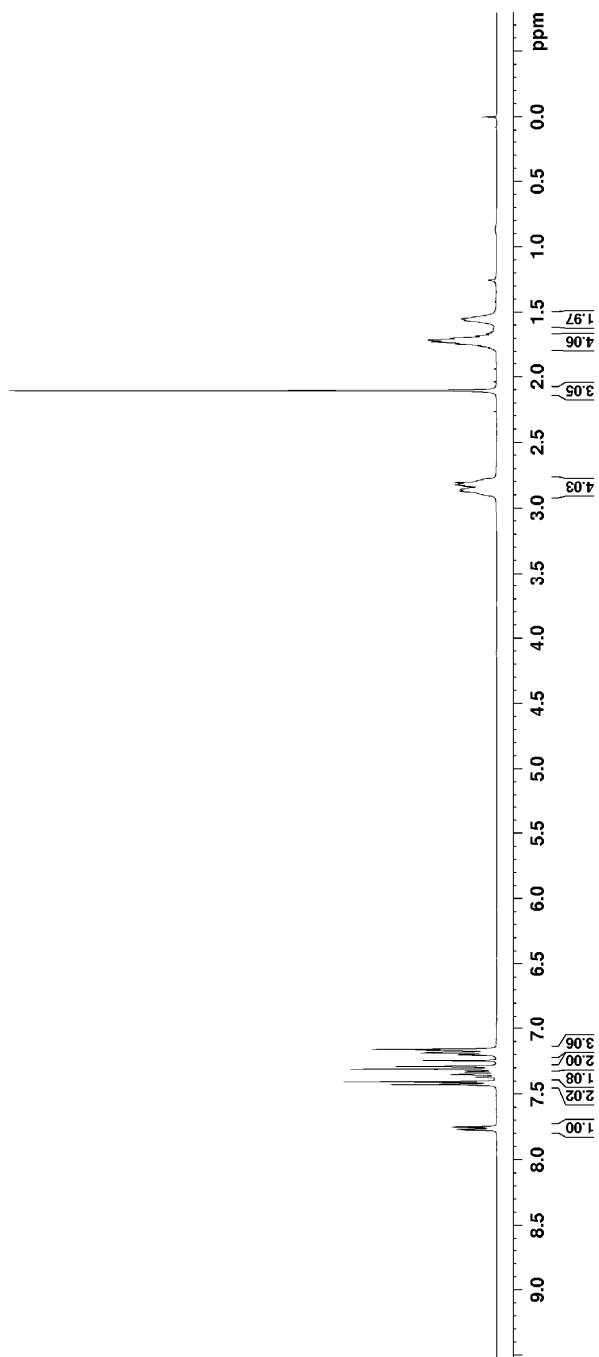

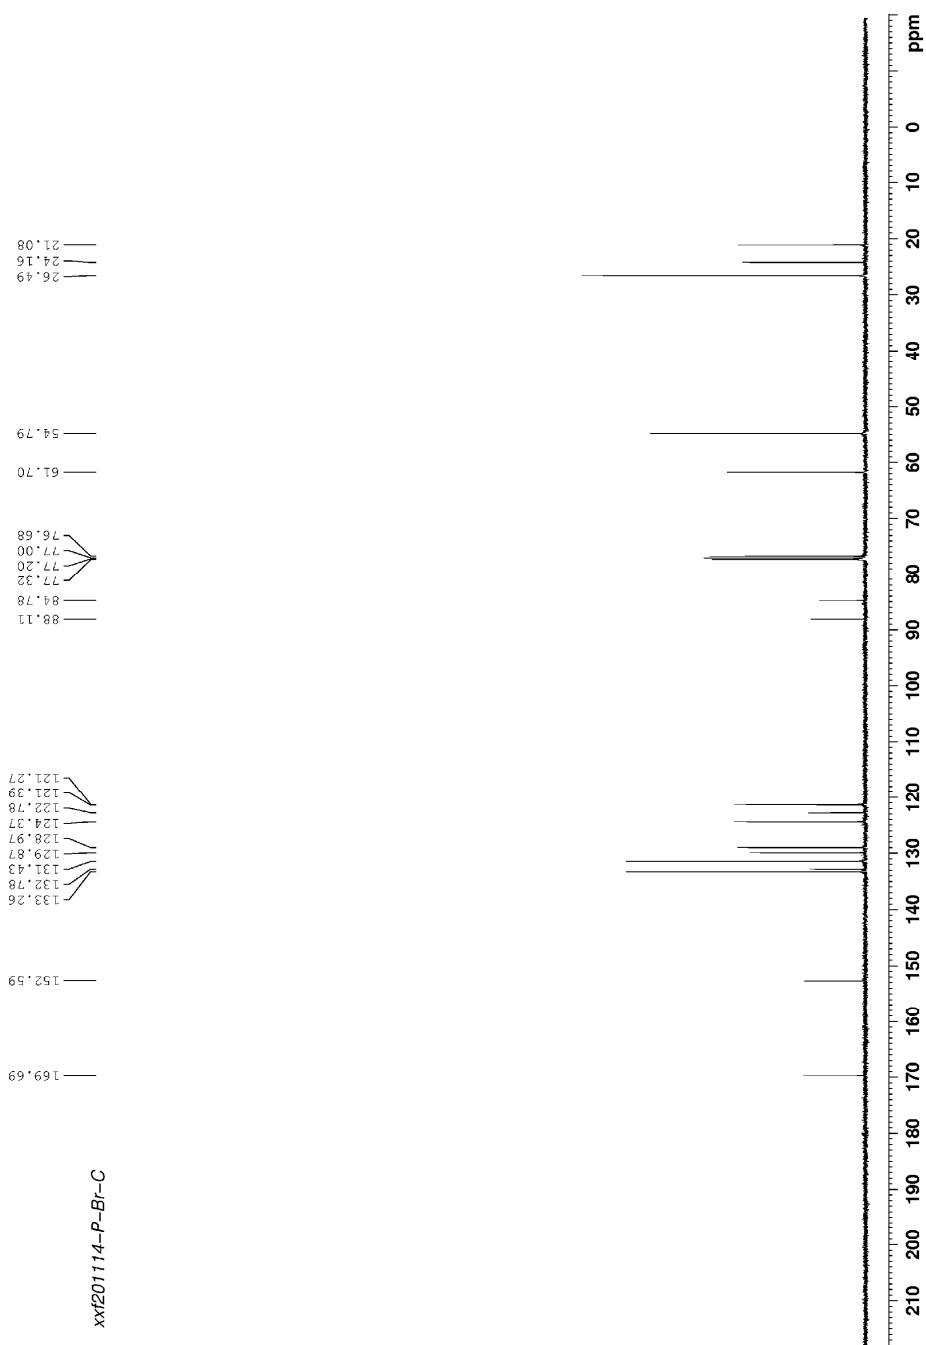

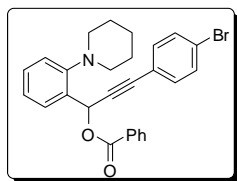

0.000  
1.688  
1.676  
1.541  
1.530  
2.888  
2.875  
2.849  
2.837  
2.822  
2.808  
2.795

8.092  
8.074  
8.071  
7.883  
7.864  
7.562  
7.544  
7.528  
7.525  
7.439  
7.422  
7.401  
7.390  
7.386  
7.381  
7.375  
7.370  
7.355  
7.351  
7.315  
7.294  
7.248  
7.234  
7.215  
7.195

XXFCYC-24-YL-H

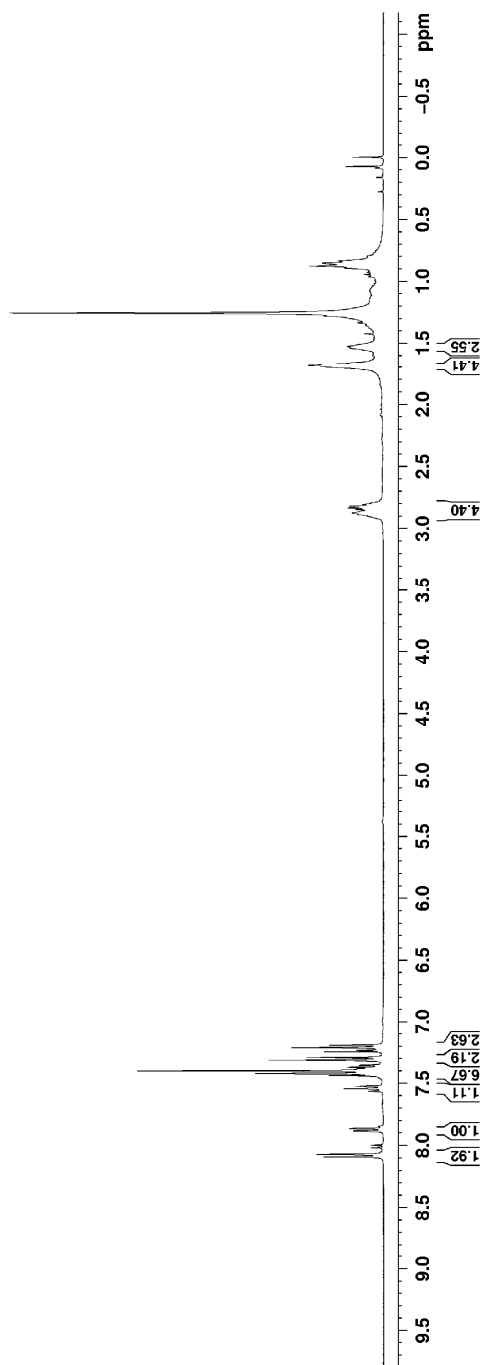

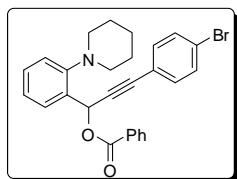

24.20  
26.51

54.87

62.37

76.68

77.00

77.32

85.02

88.21

121.35

121.50

122.79

124.43

128.32

129.08

129.83

129.89

130.07

131.45

131.49

132.98

133.04

133.31

152.80

165.34

XXFCYC-24-YL-C

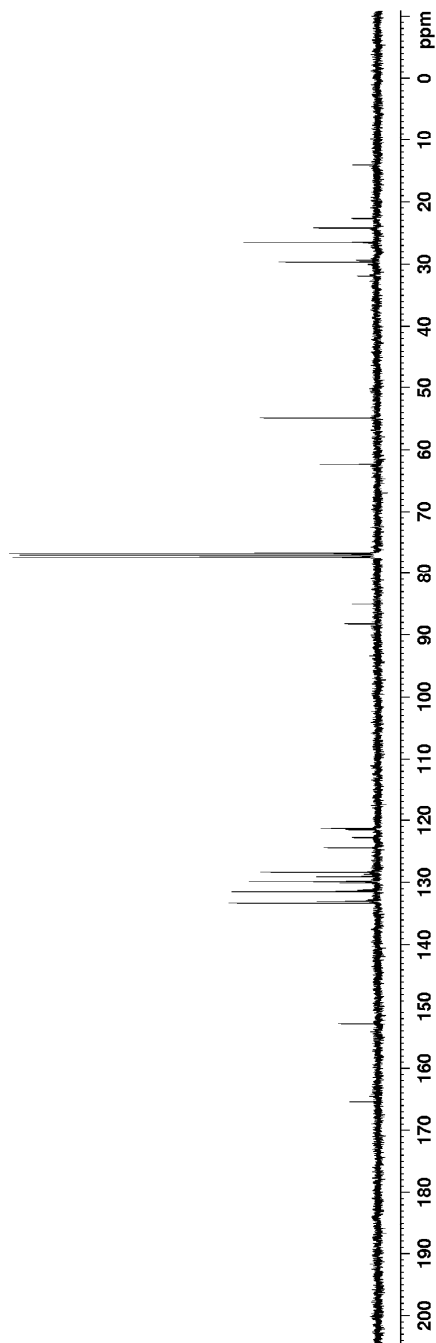

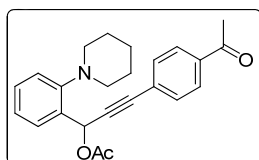

0.000

1.544  
1.558  
1.572  
1.675  
1.693  
1.708  
1.723  
1.735  
1.751  
1.767  
1.784  
2.113  
2.569  
2.791  
2.807  
2.819  
2.829  
2.835  
2.845  
2.858  
2.868  
2.874  
2.884  
2.896  
2.912

7.171  
7.178  
7.180  
7.189  
7.198  
7.200  
7.209  
7.334  
7.338  
7.356  
7.372  
7.376  
7.510  
7.531  
7.758  
7.761  
7.777  
7.781  
7.866  
7.887

XXFCYC-19-YL-H

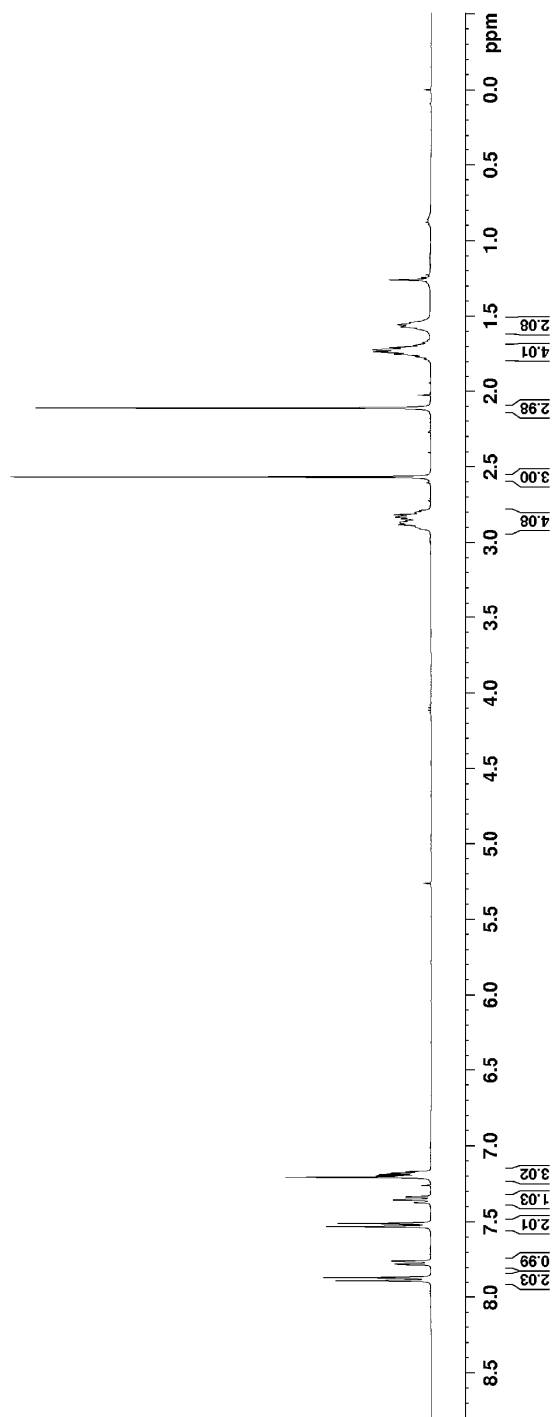

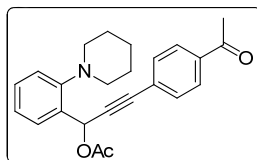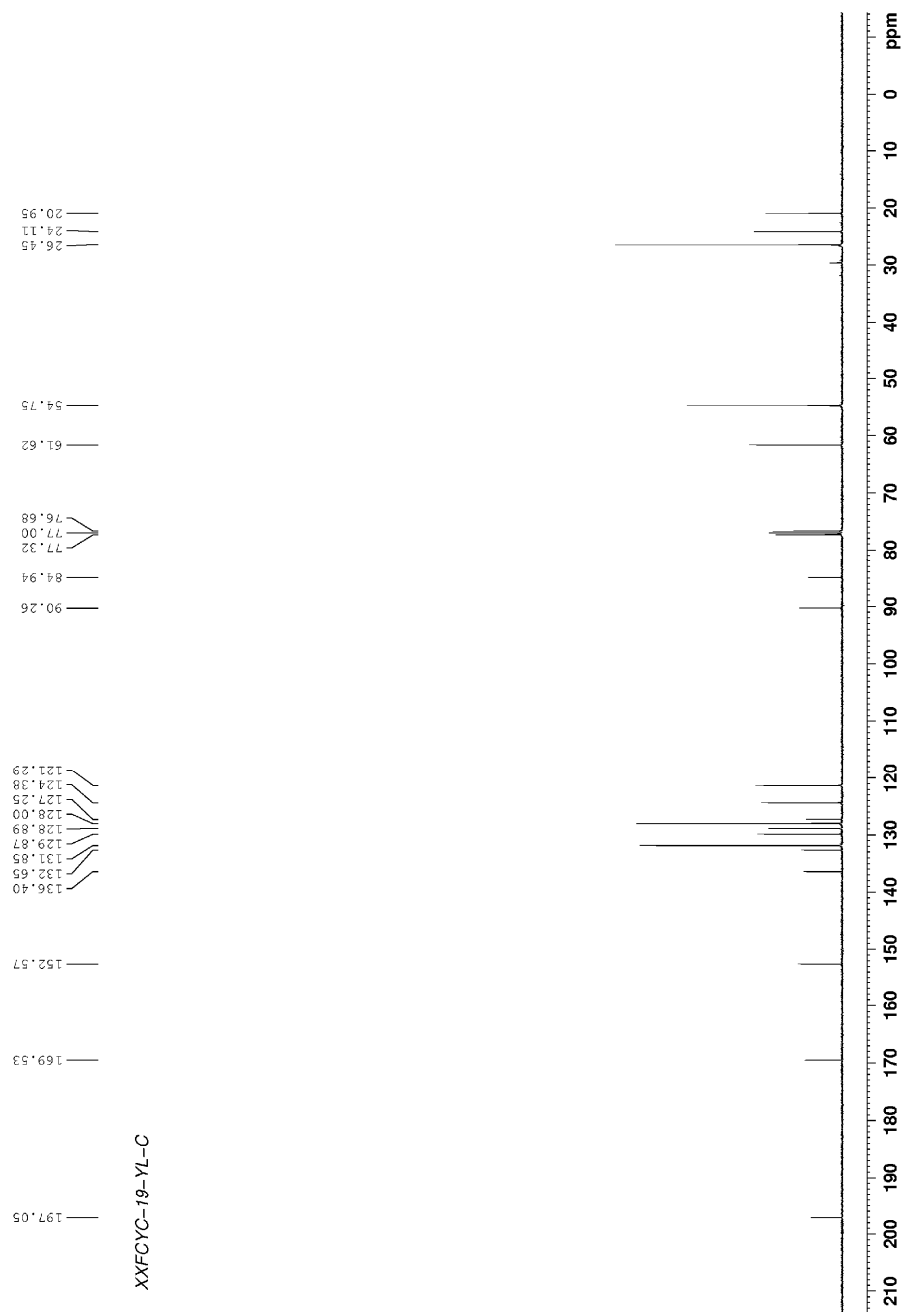

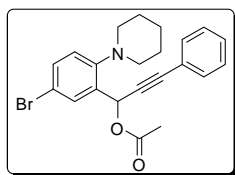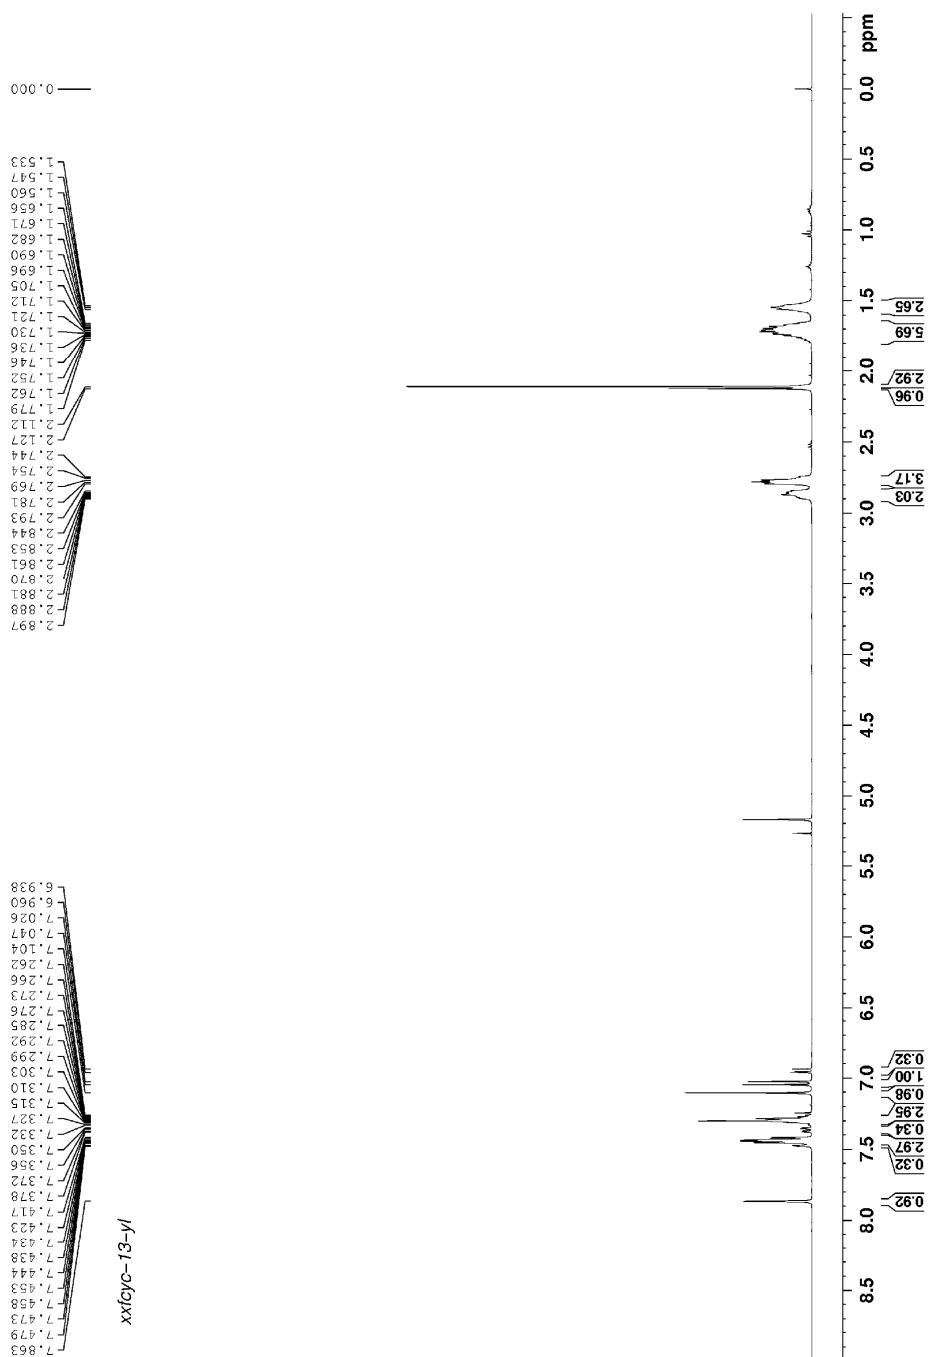

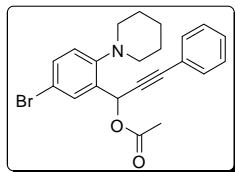

20.97  
21.02  
24.06  
26.38

54.27  
54.67  
61.15  
61.70

76.68  
77.00  
77.32  
86.22  
86.29

116.24  
117.30  
121.73  
122.15  
122.03  
128.19  
128.65  
131.56  
131.72  
131.80  
131.84  
132.60  
133.14  
133.38

151.46  
151.90

169.43  
170.78

xxivc-13-y-C

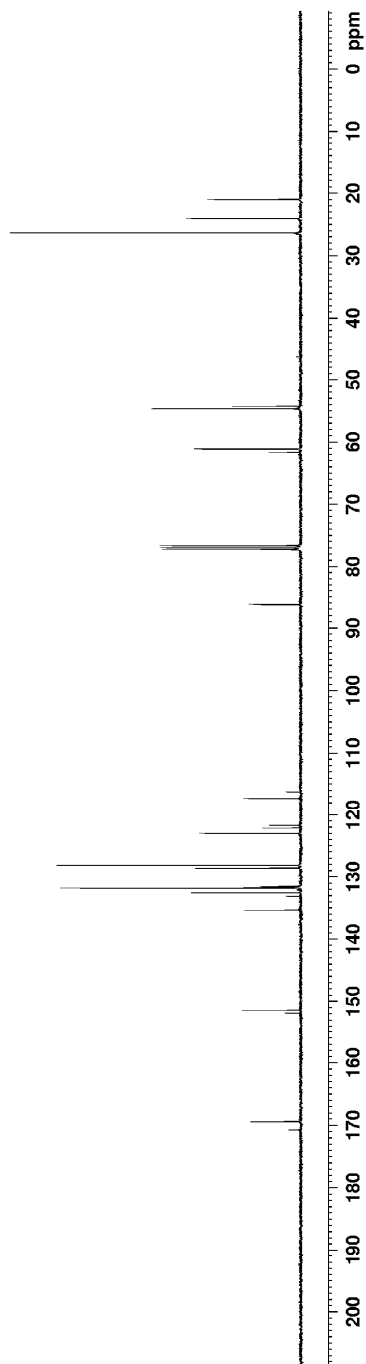



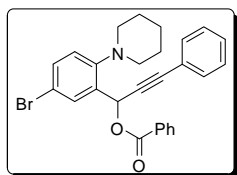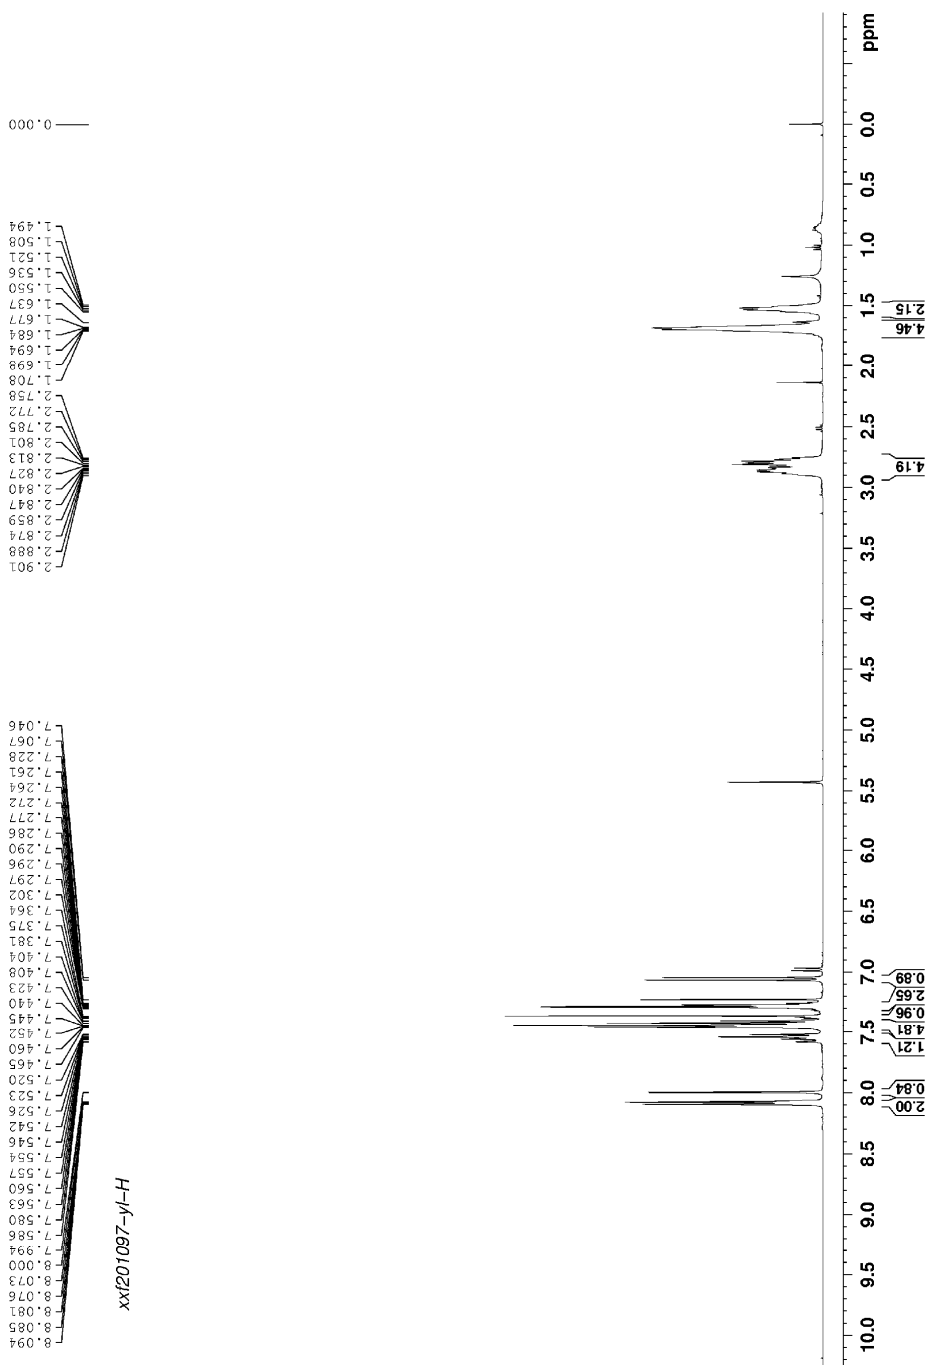



26.41  
26.38  
24.06

54.73  
54.35  
61.80

76.88  
77.00  
77.32  
86.24  
86.59

117.35  
122.19  
123.13  
128.19  
128.34  
128.39  
128.65  
129.61  
129.60  
129.87  
131.87  
131.92  
131.96  
132.70  
133.11  
133.46  
151.67

165.14

xx1201097-yl-C

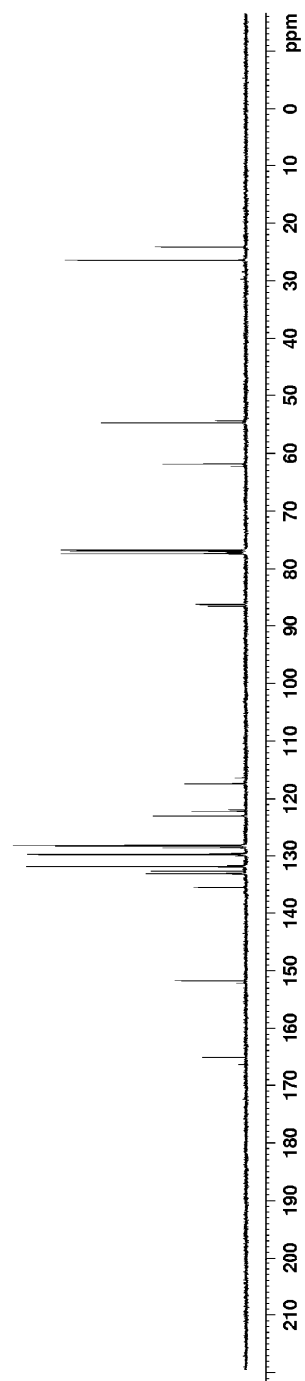

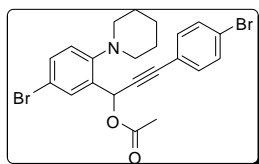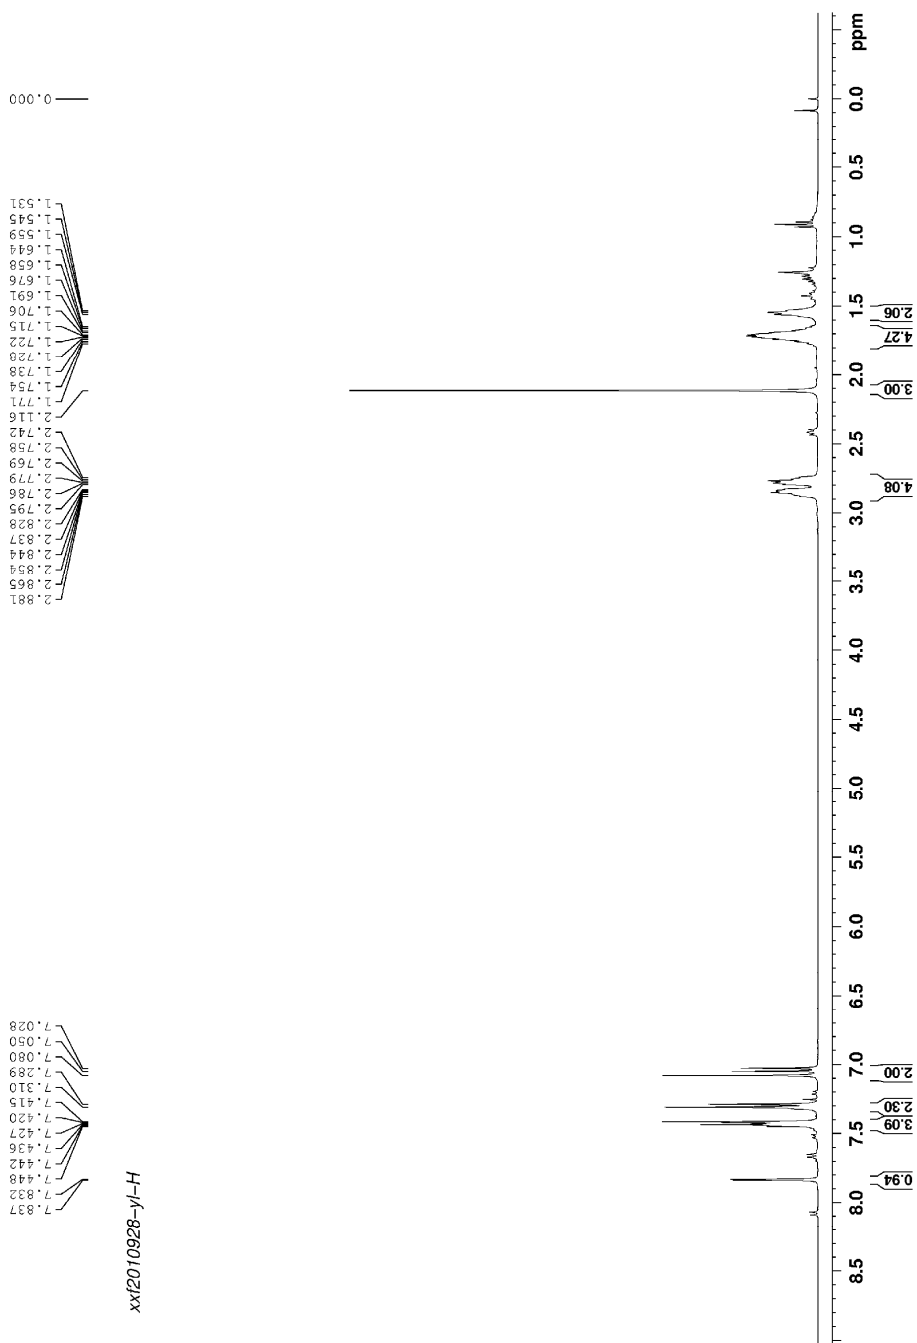

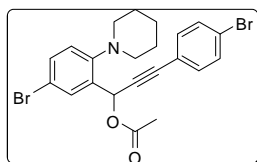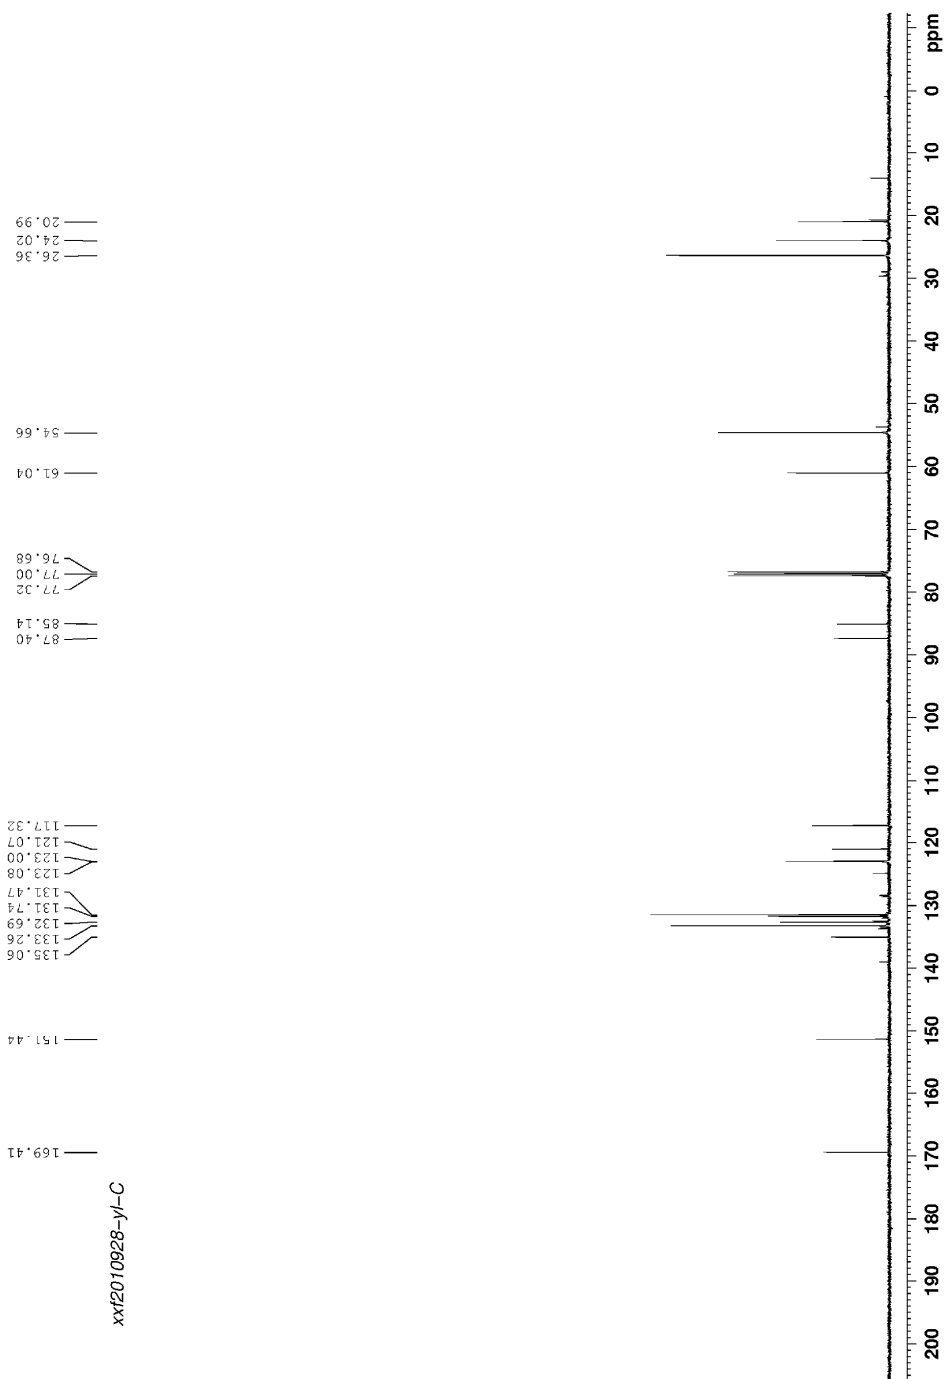

xxf2010928-y-C

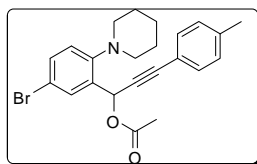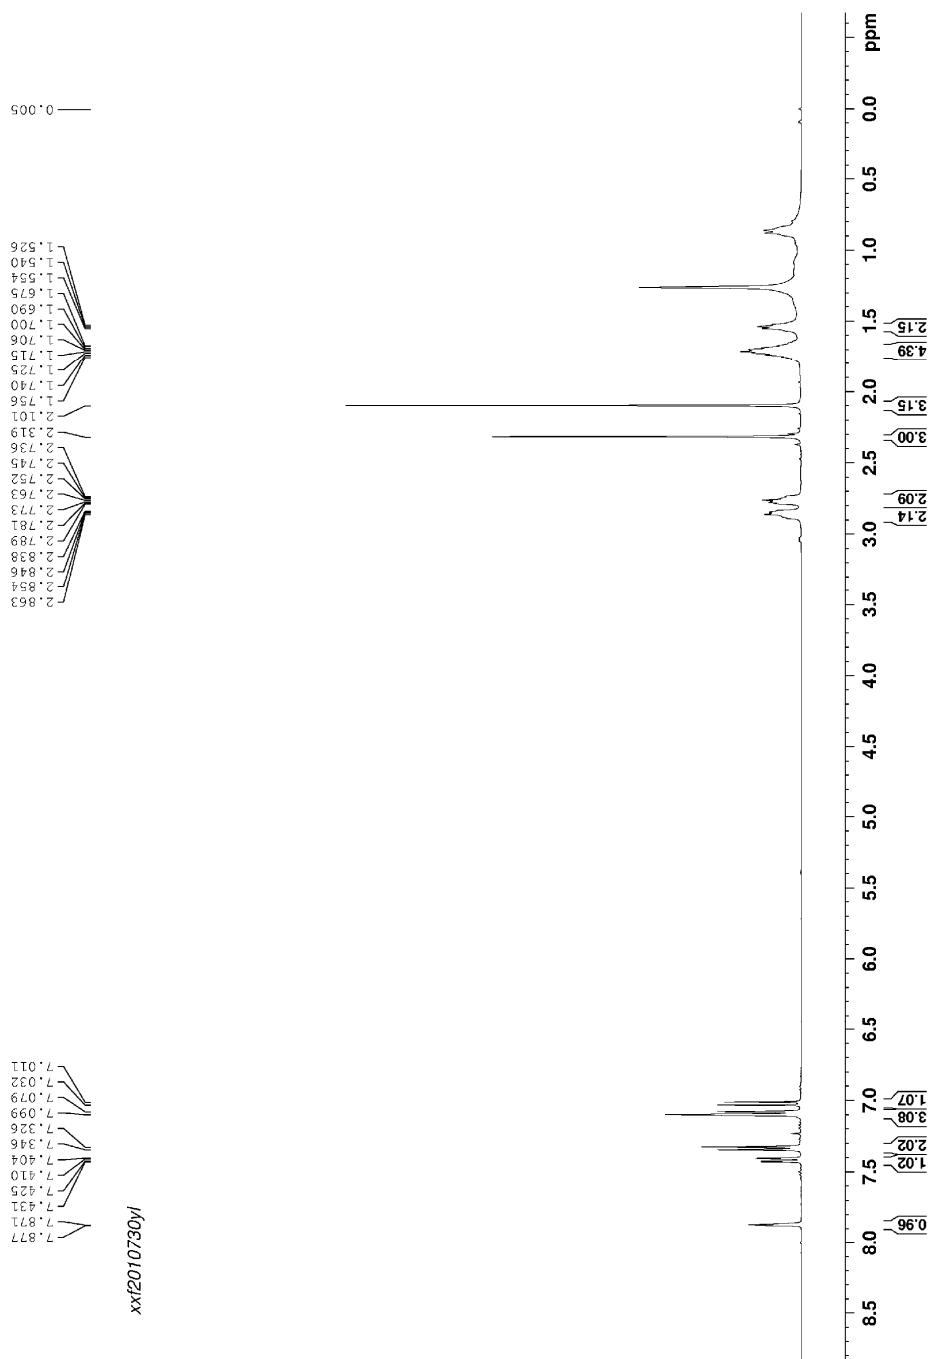

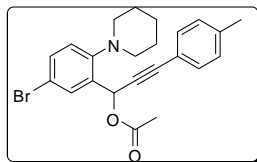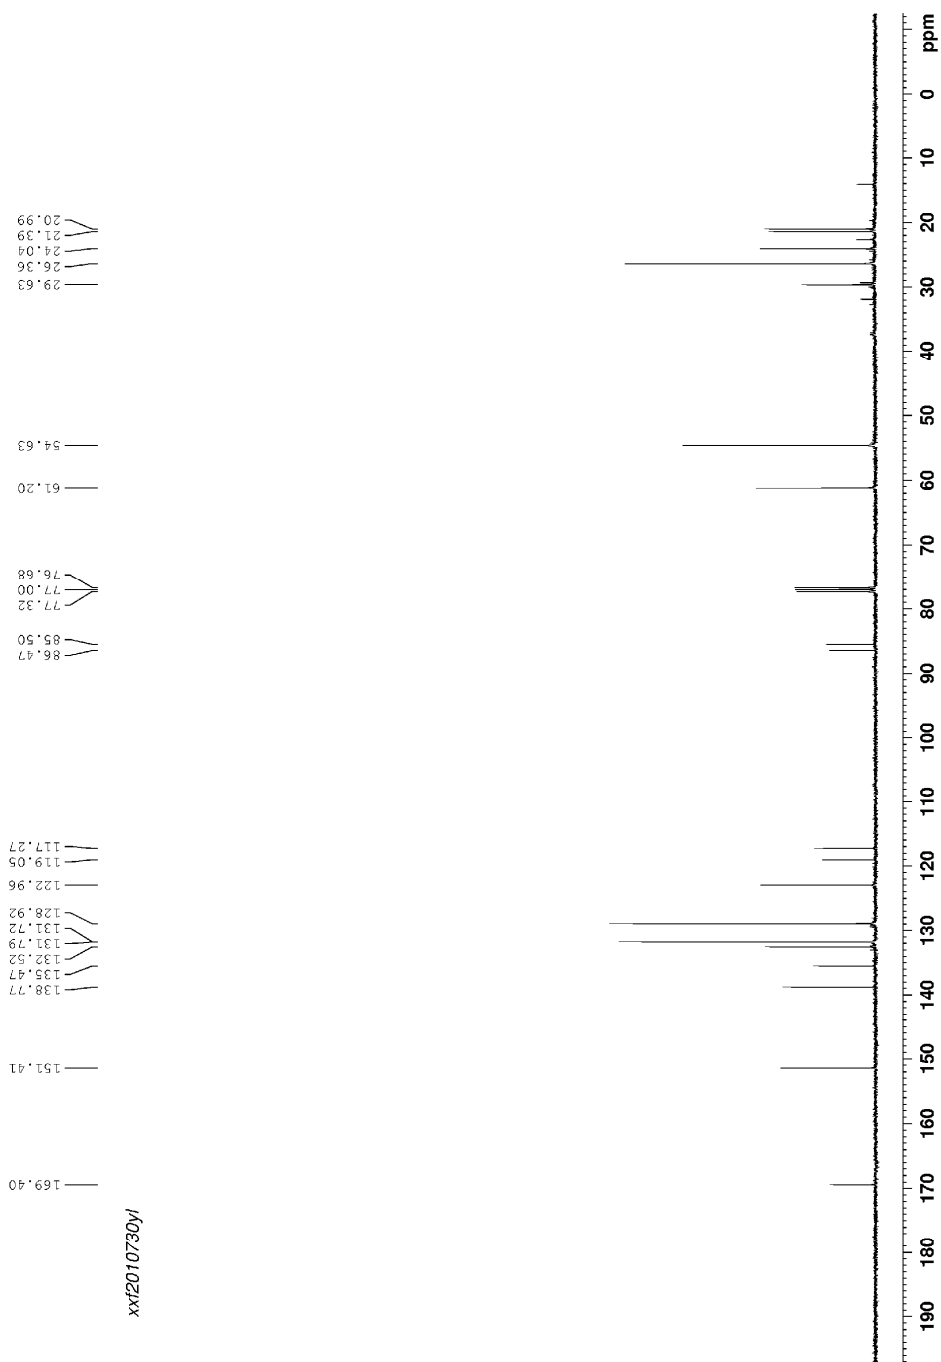

xx12010730y1

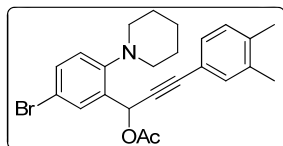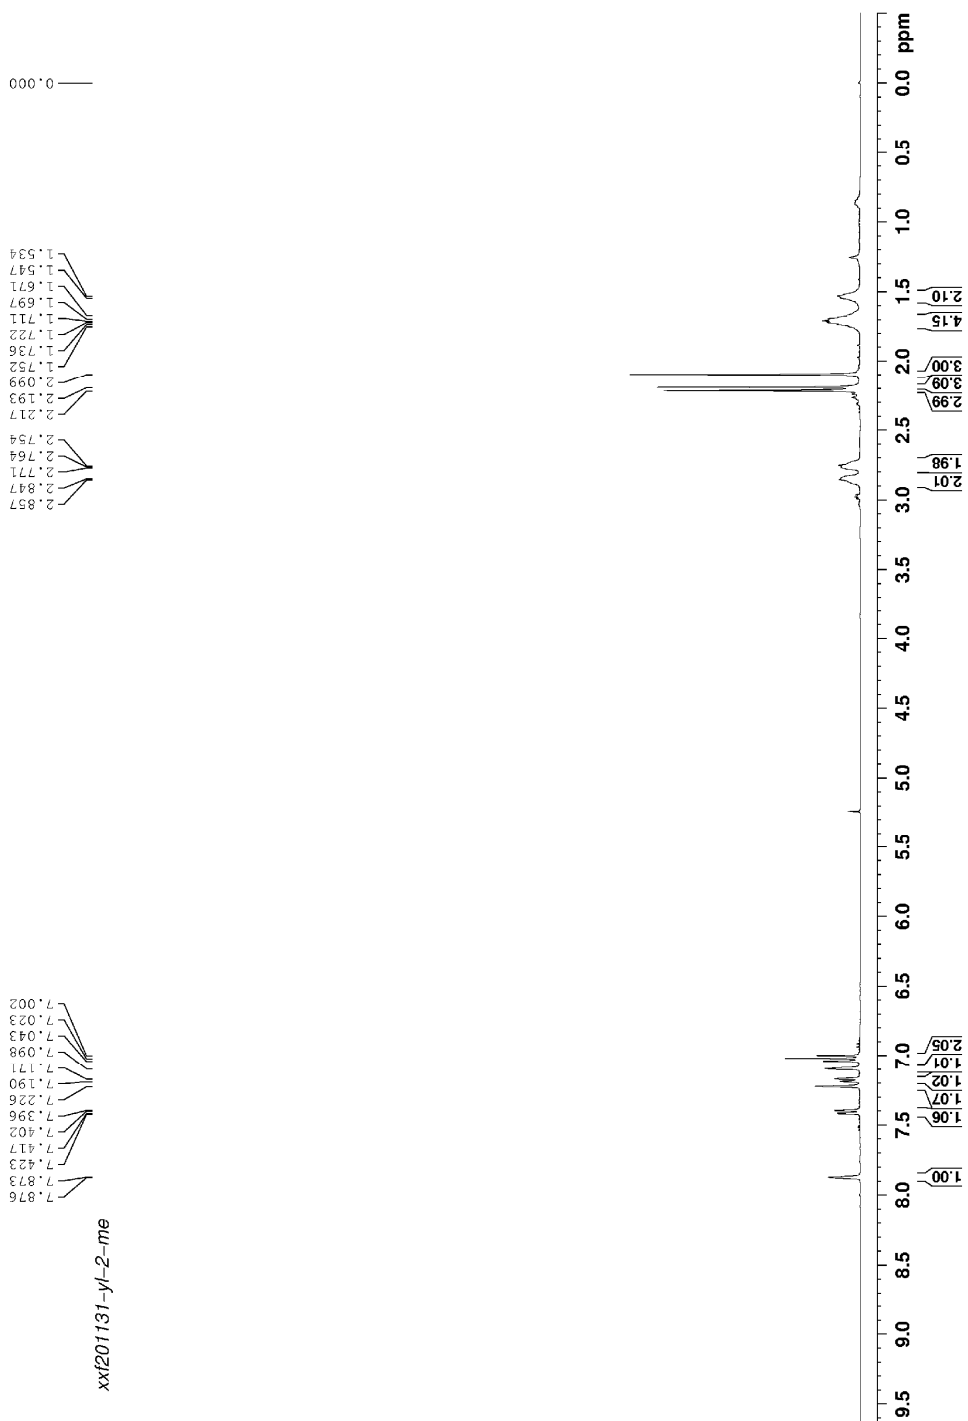

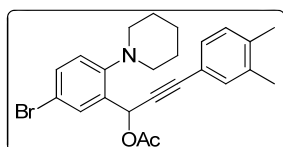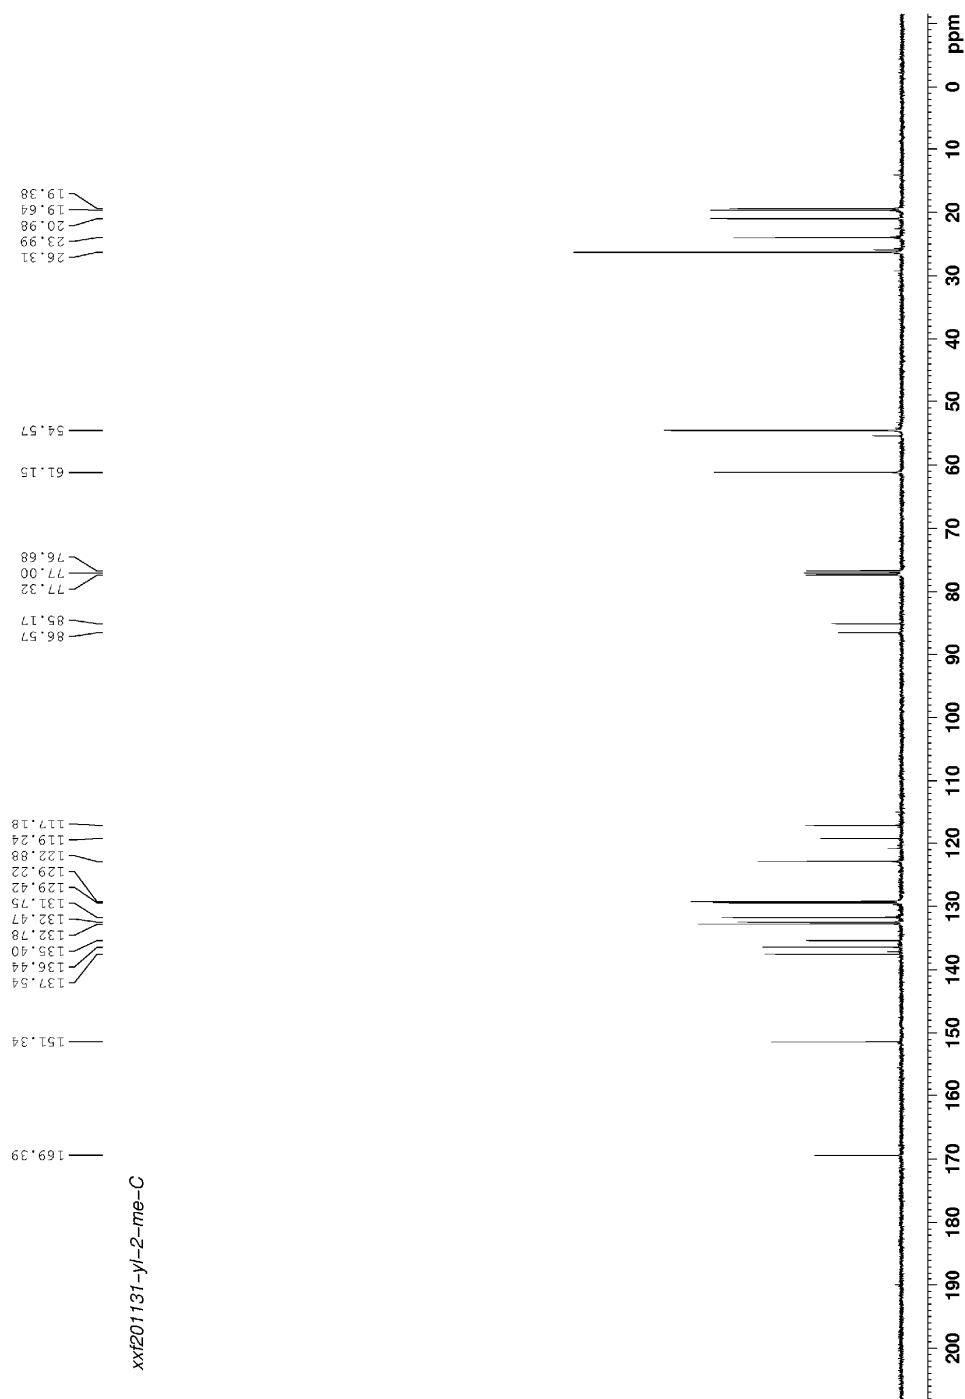



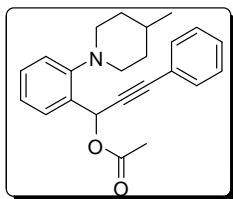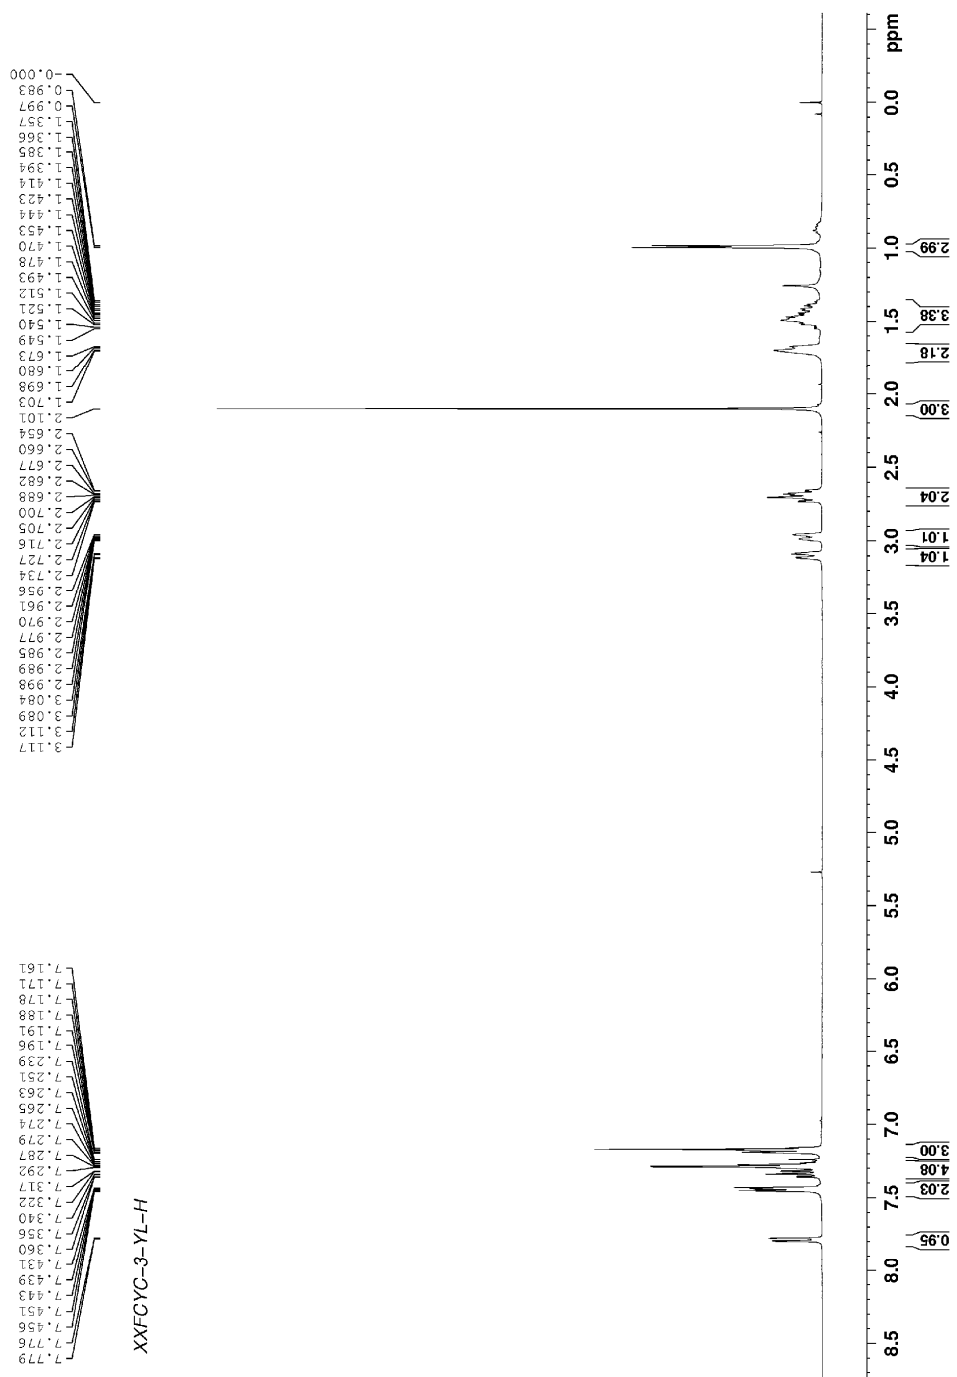

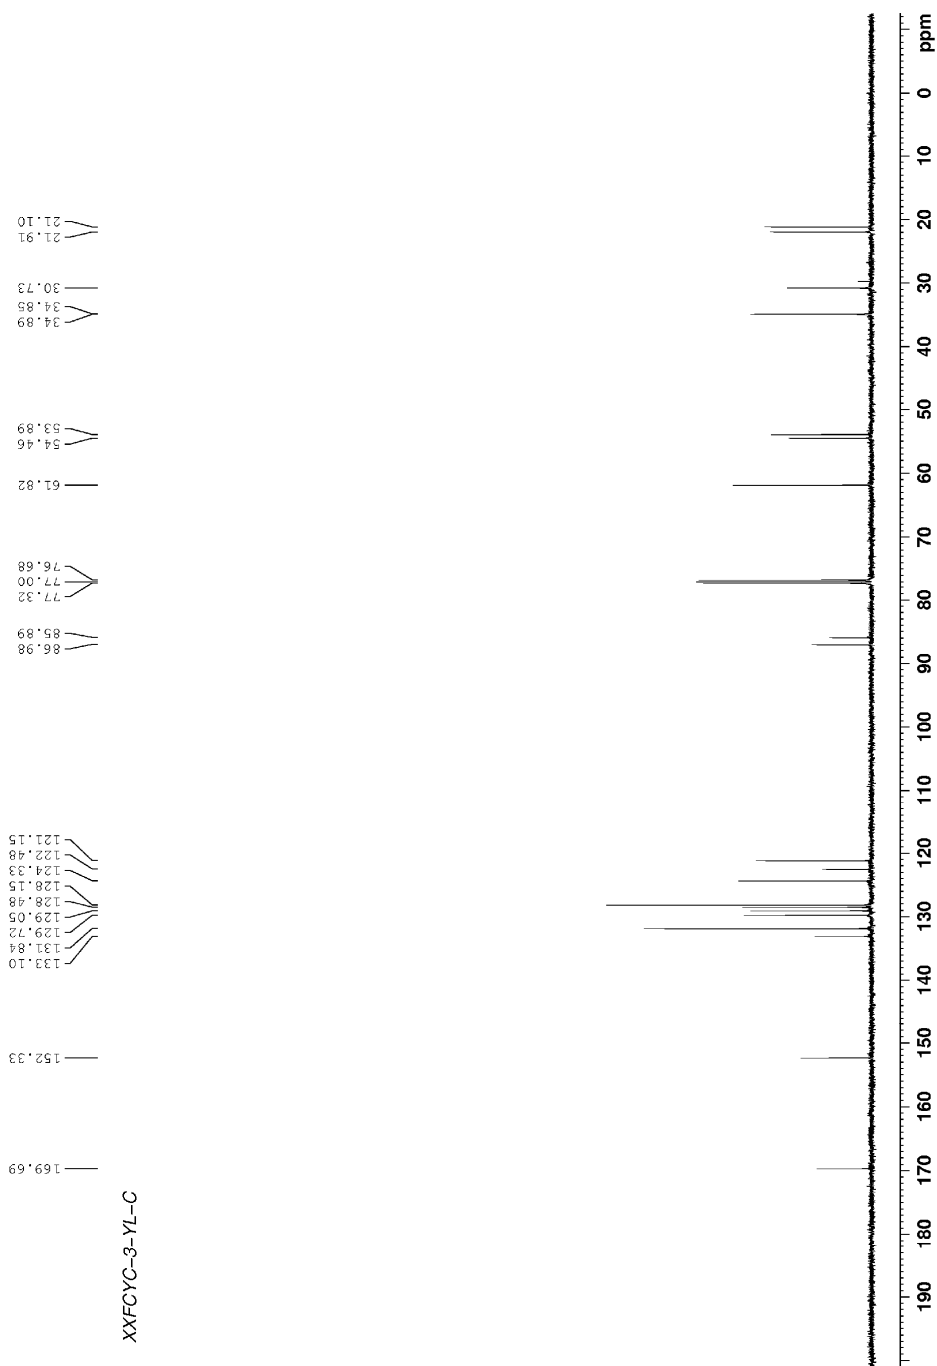

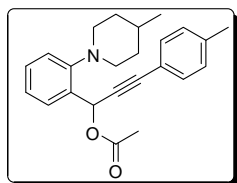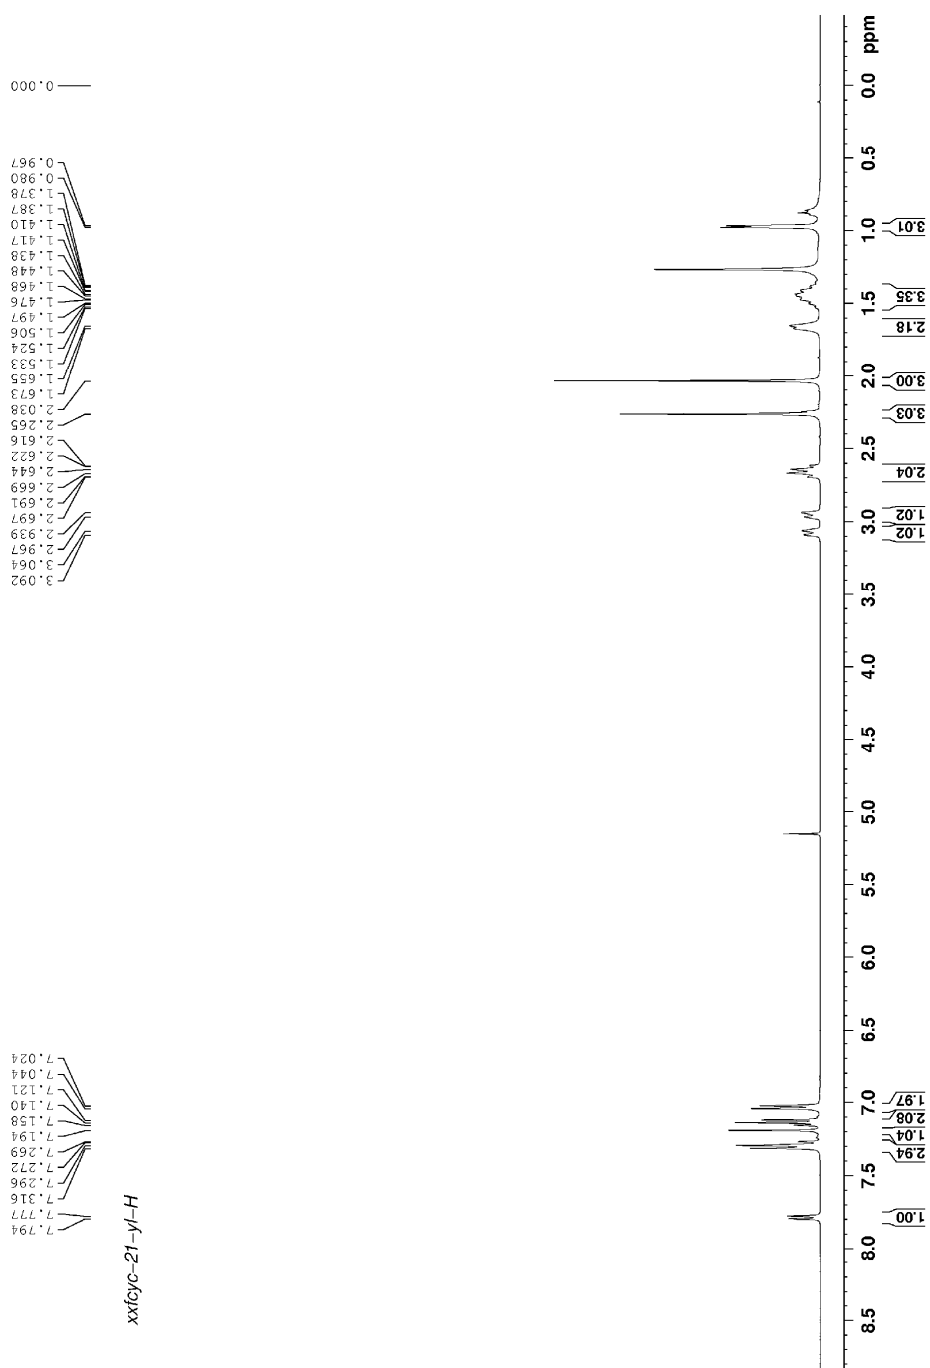

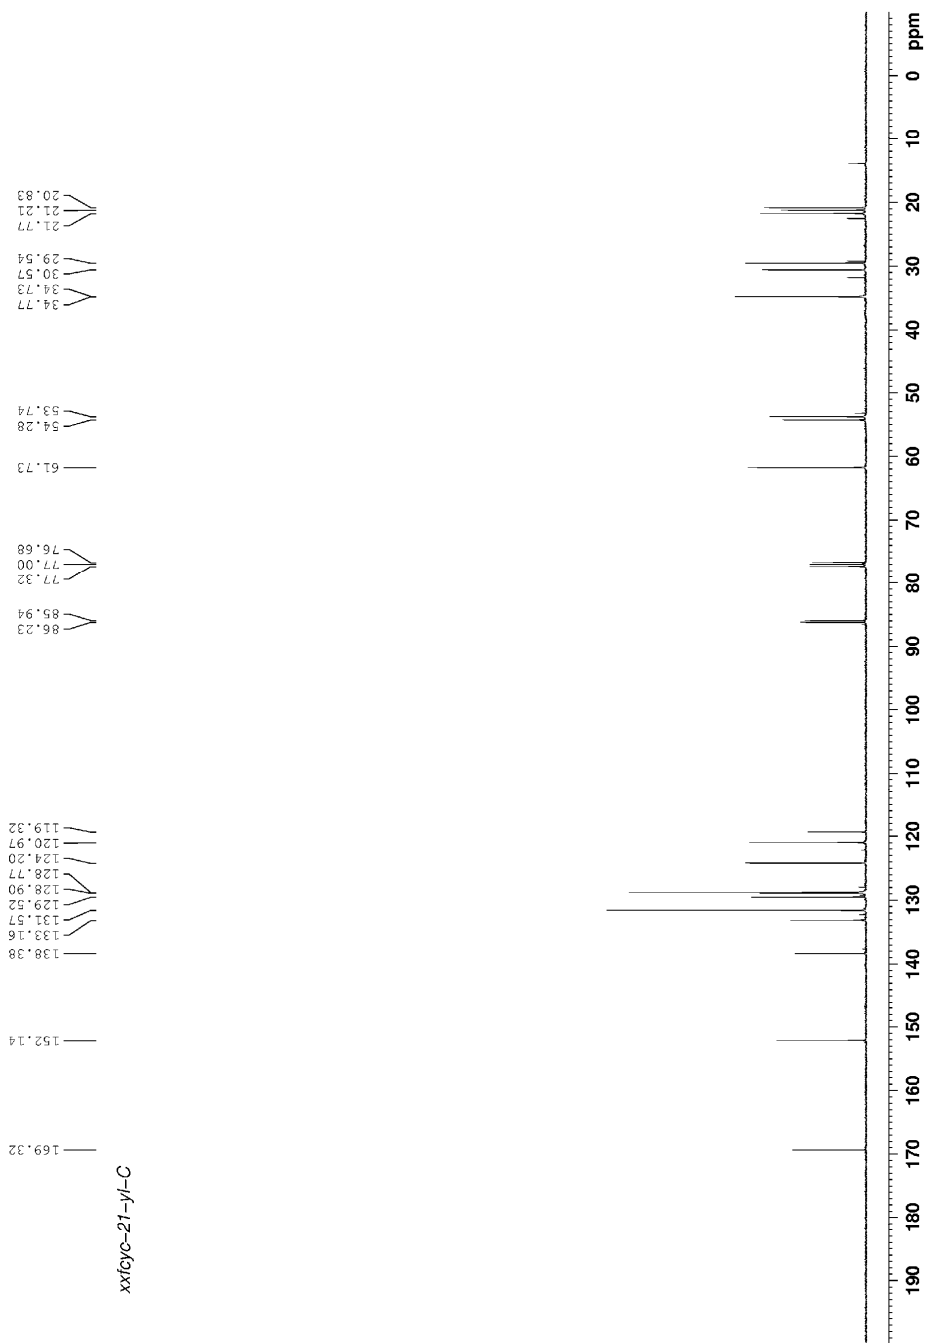

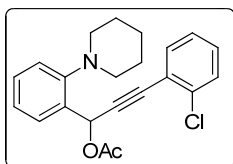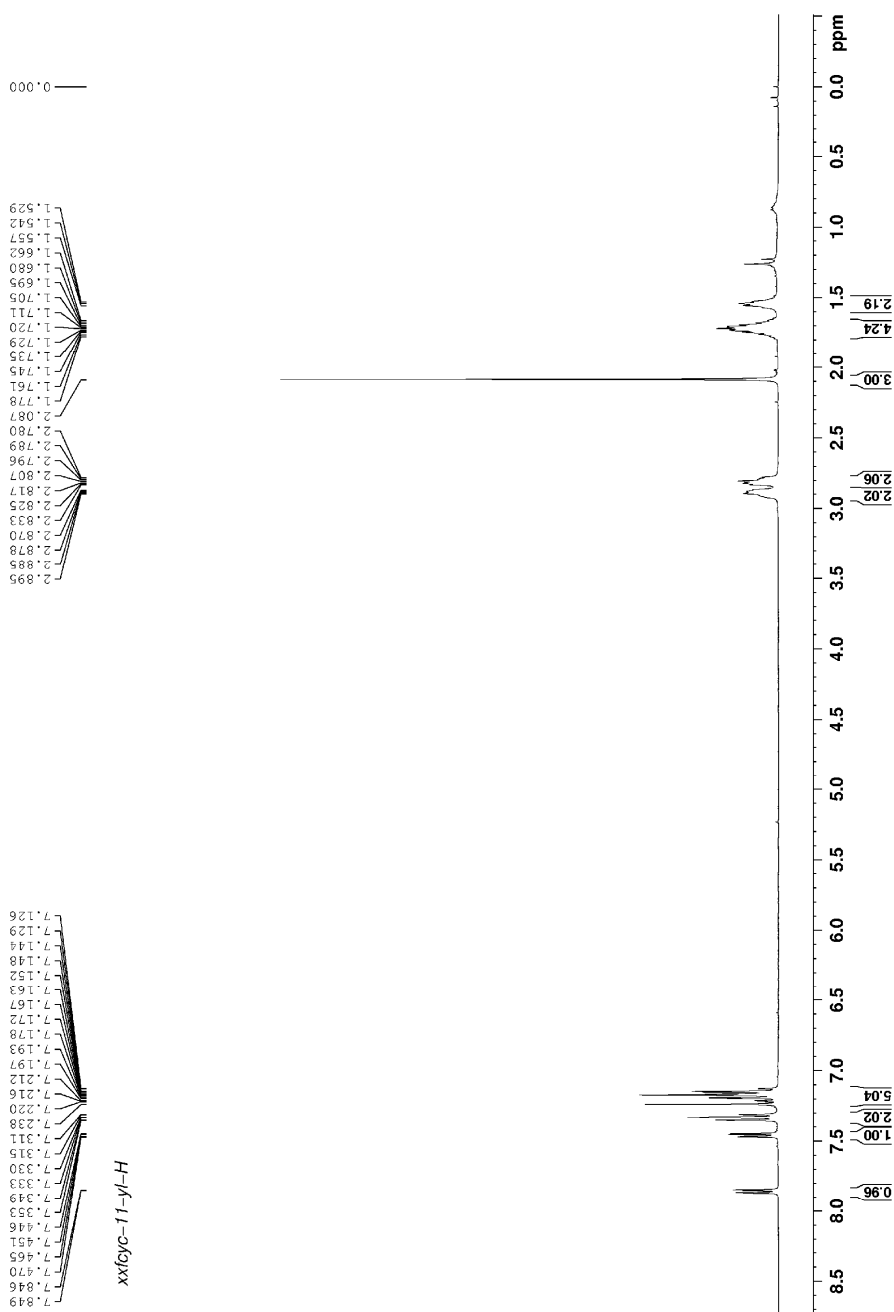

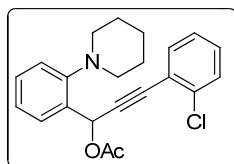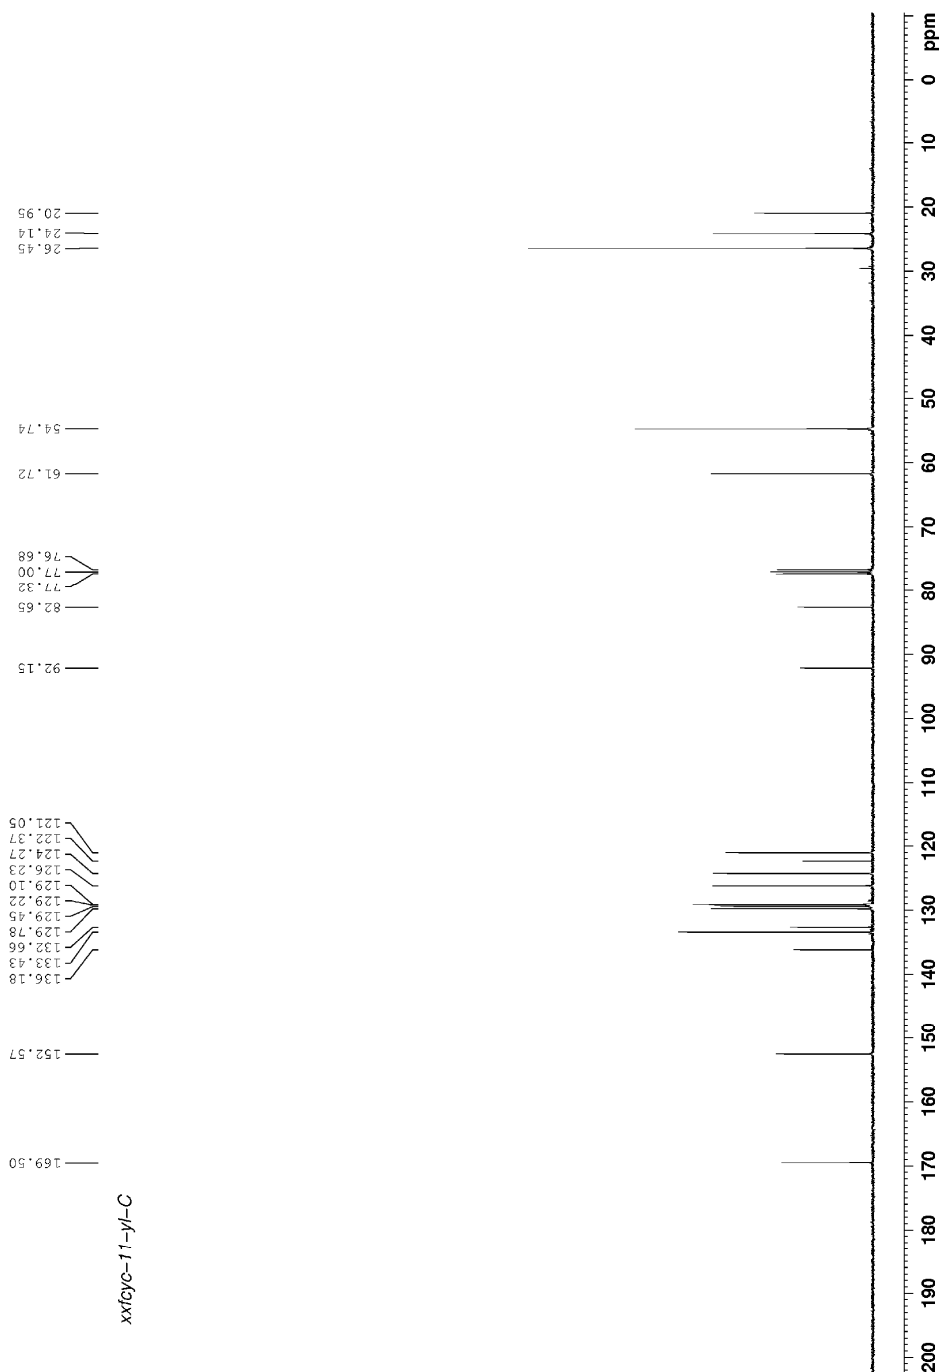



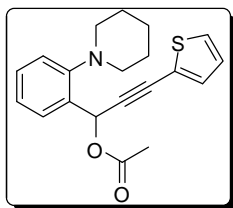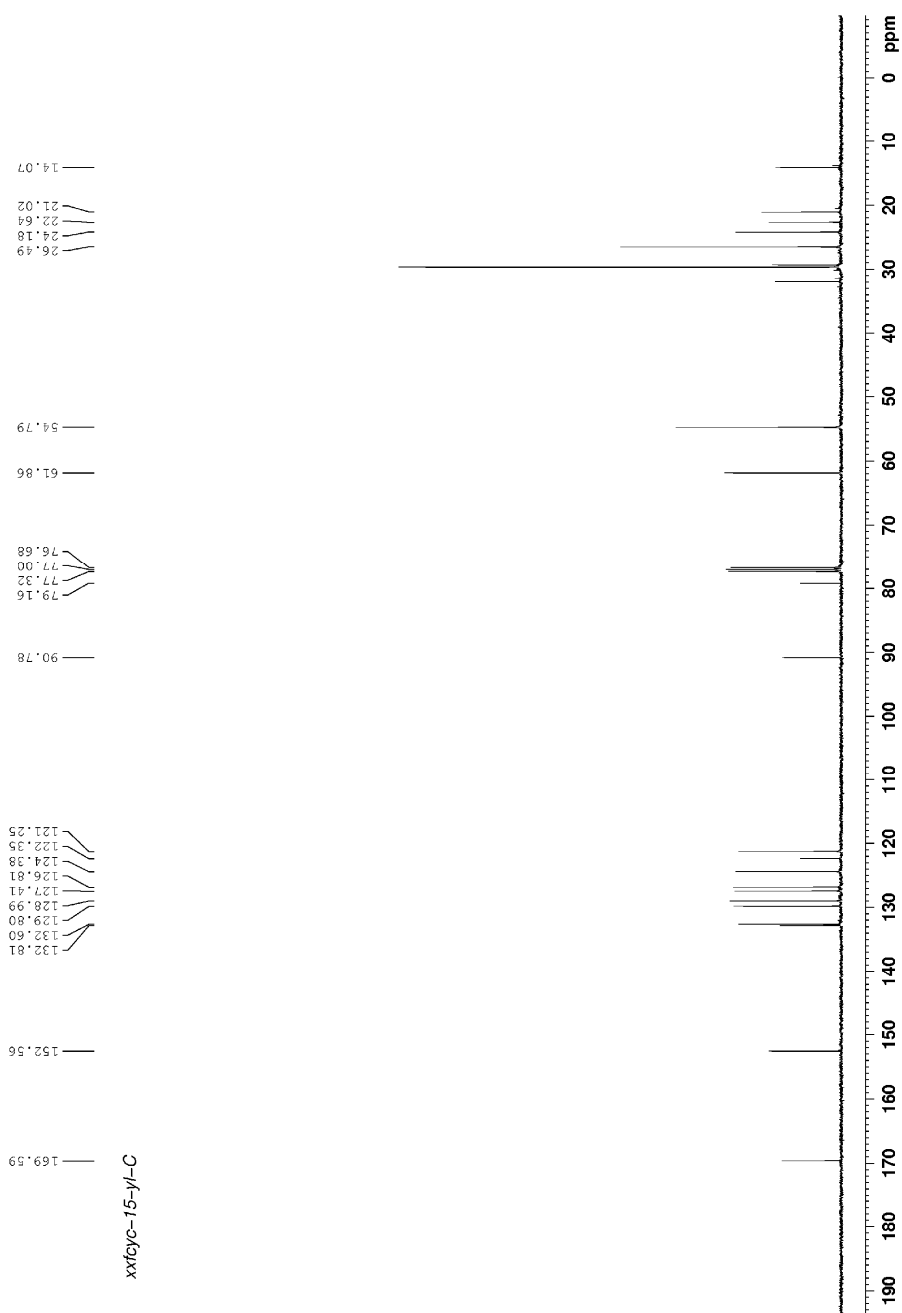



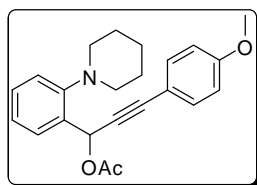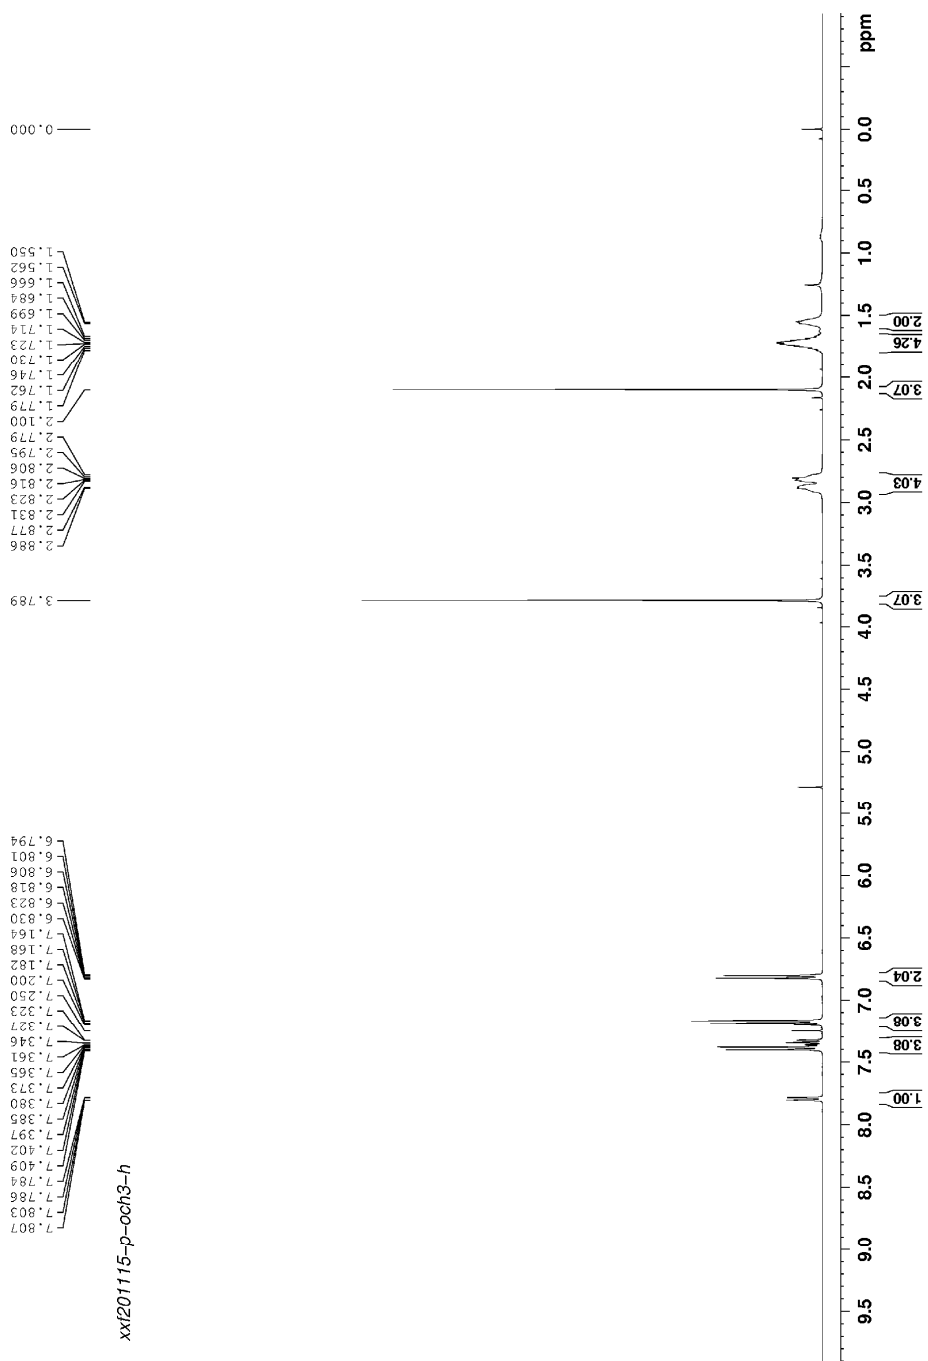

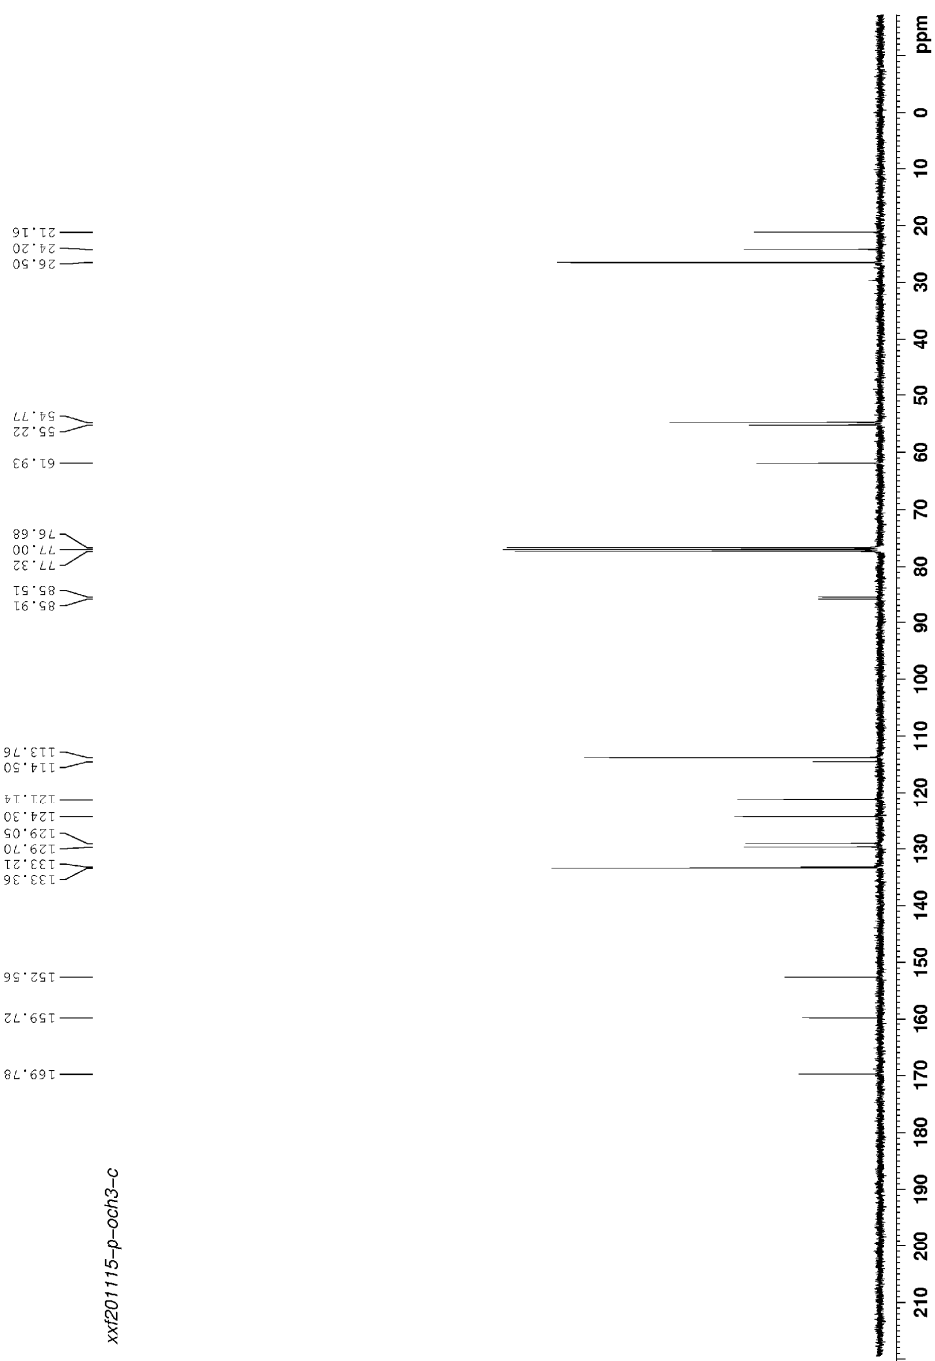

xxf201115-p-och3-c

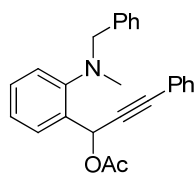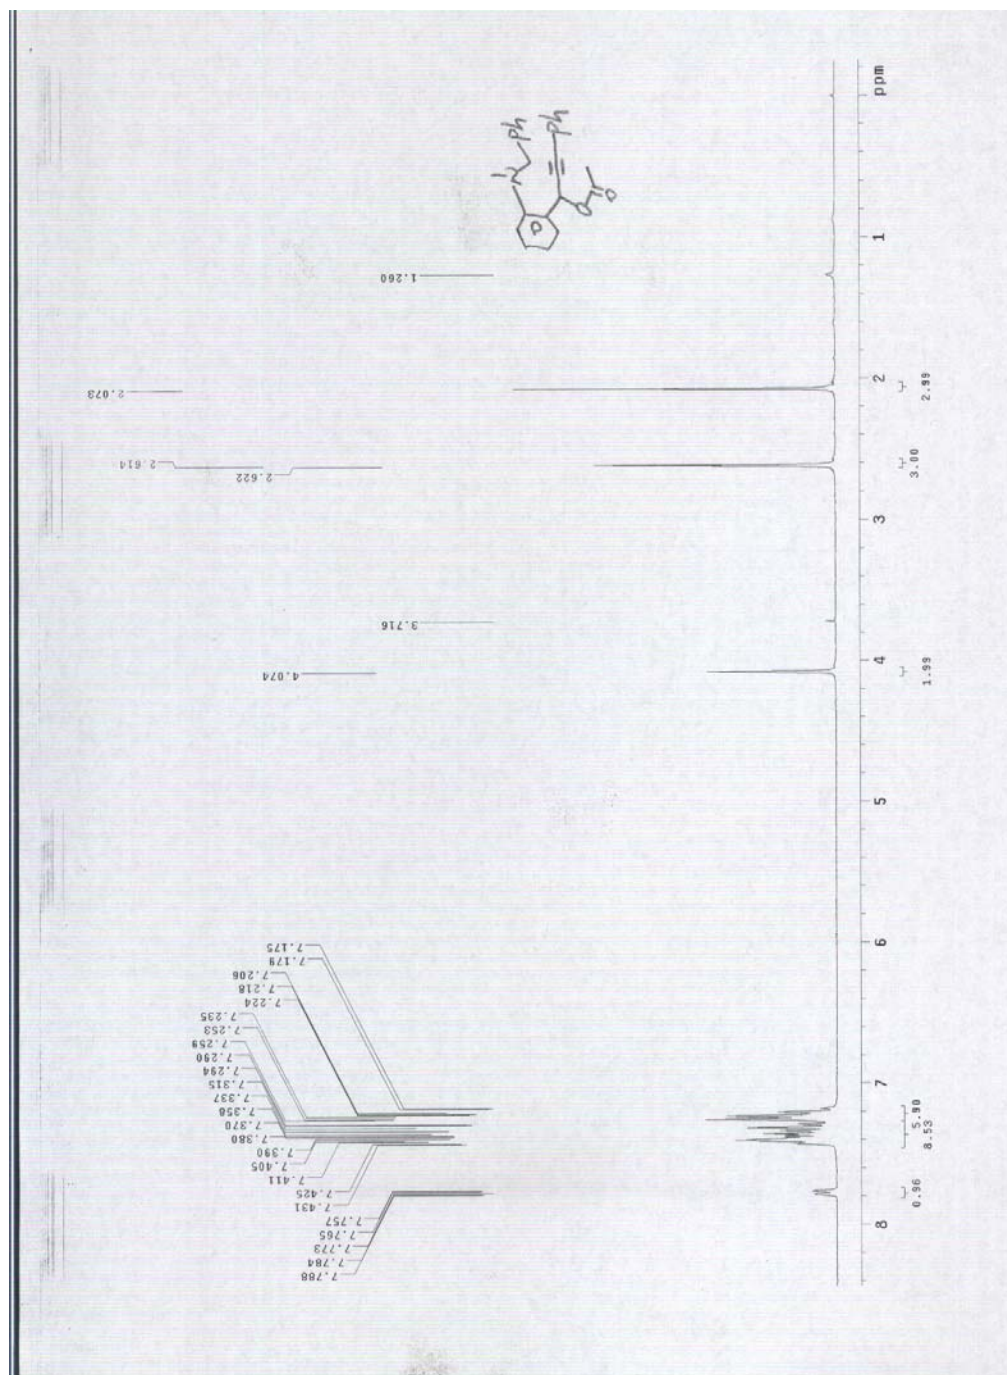

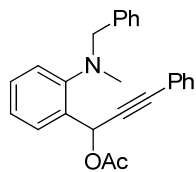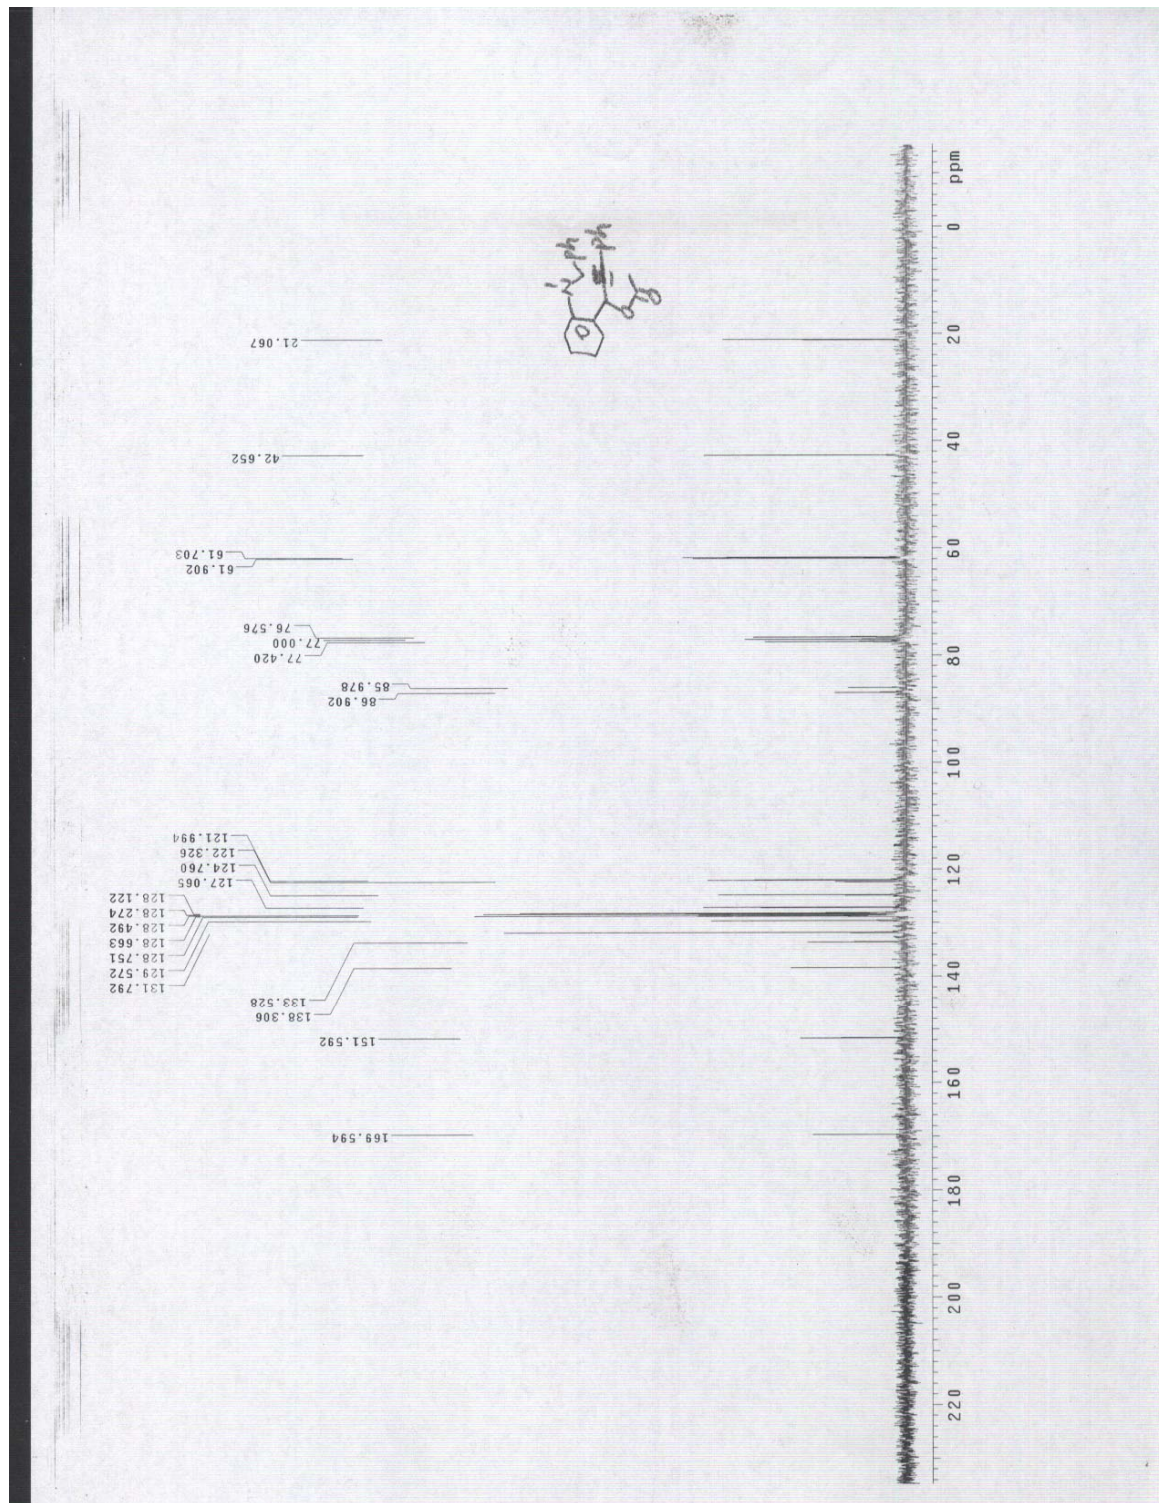



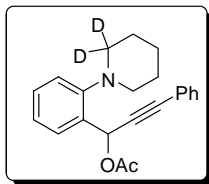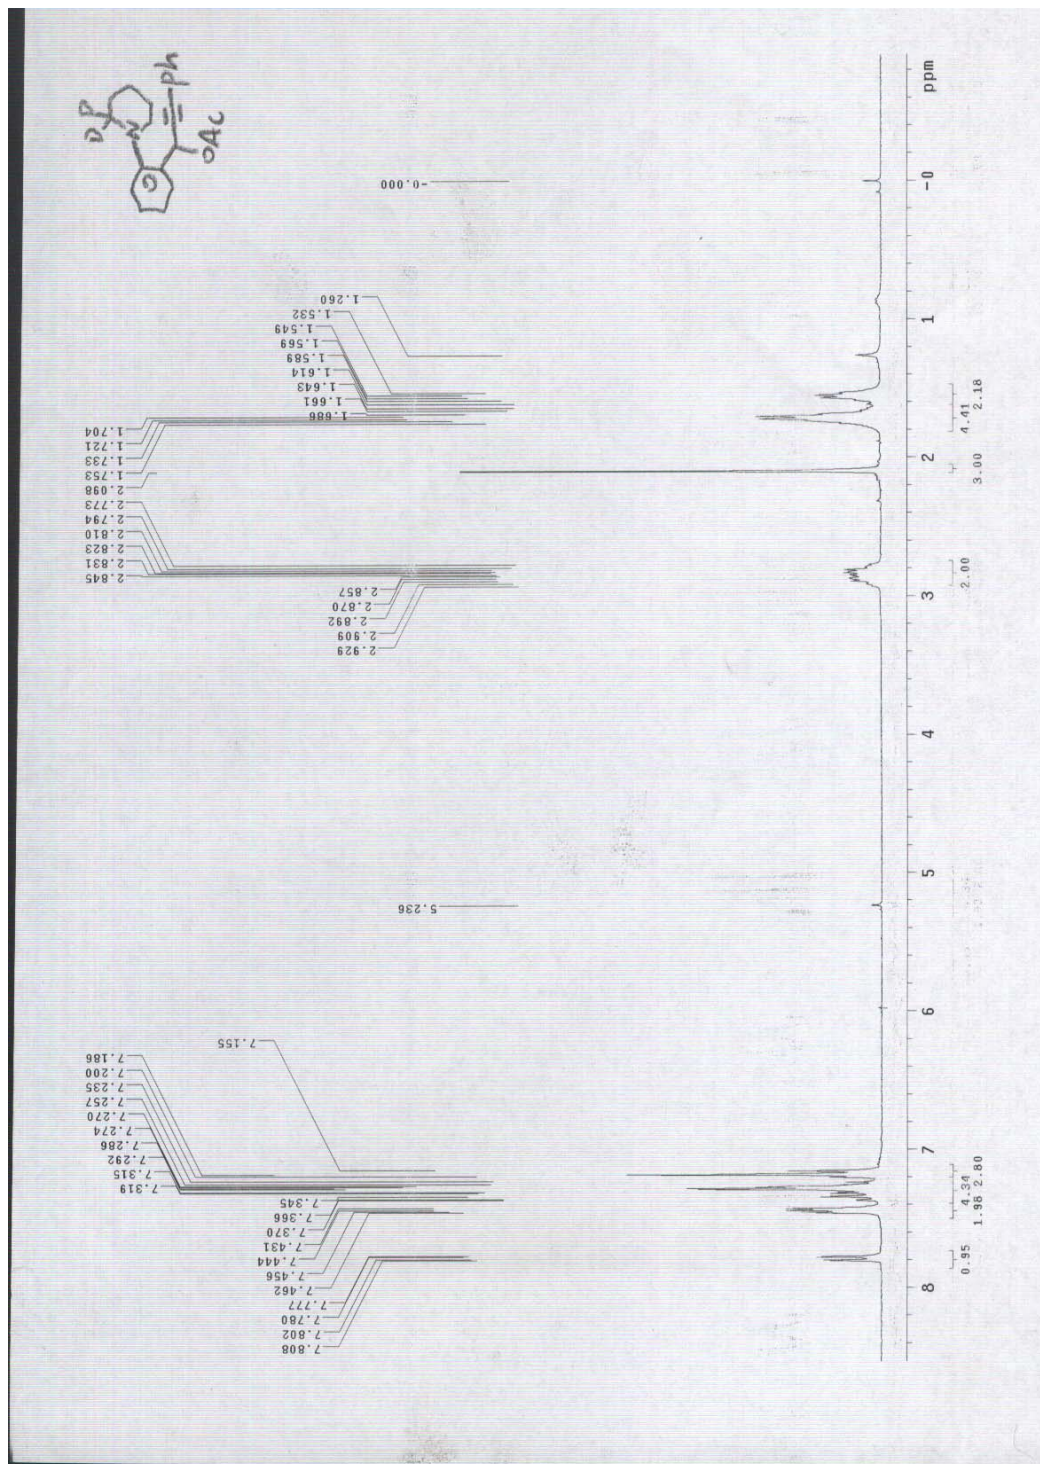

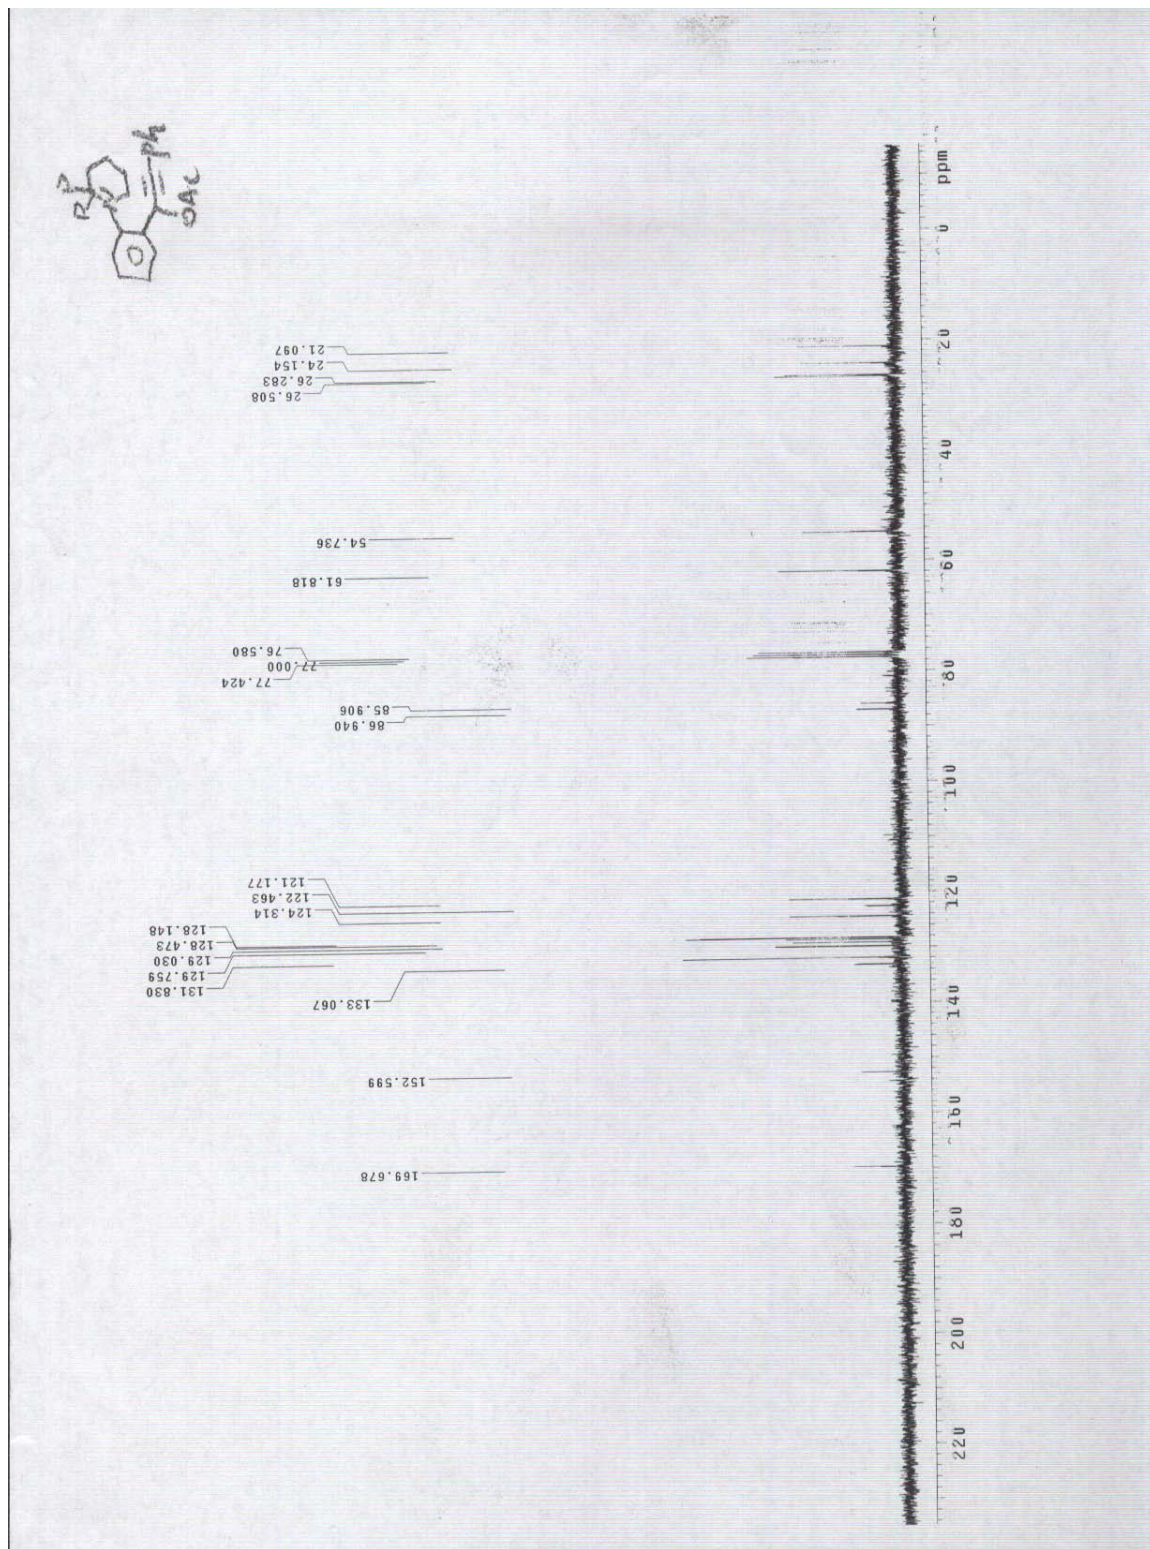



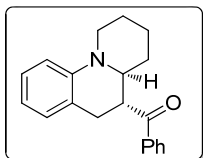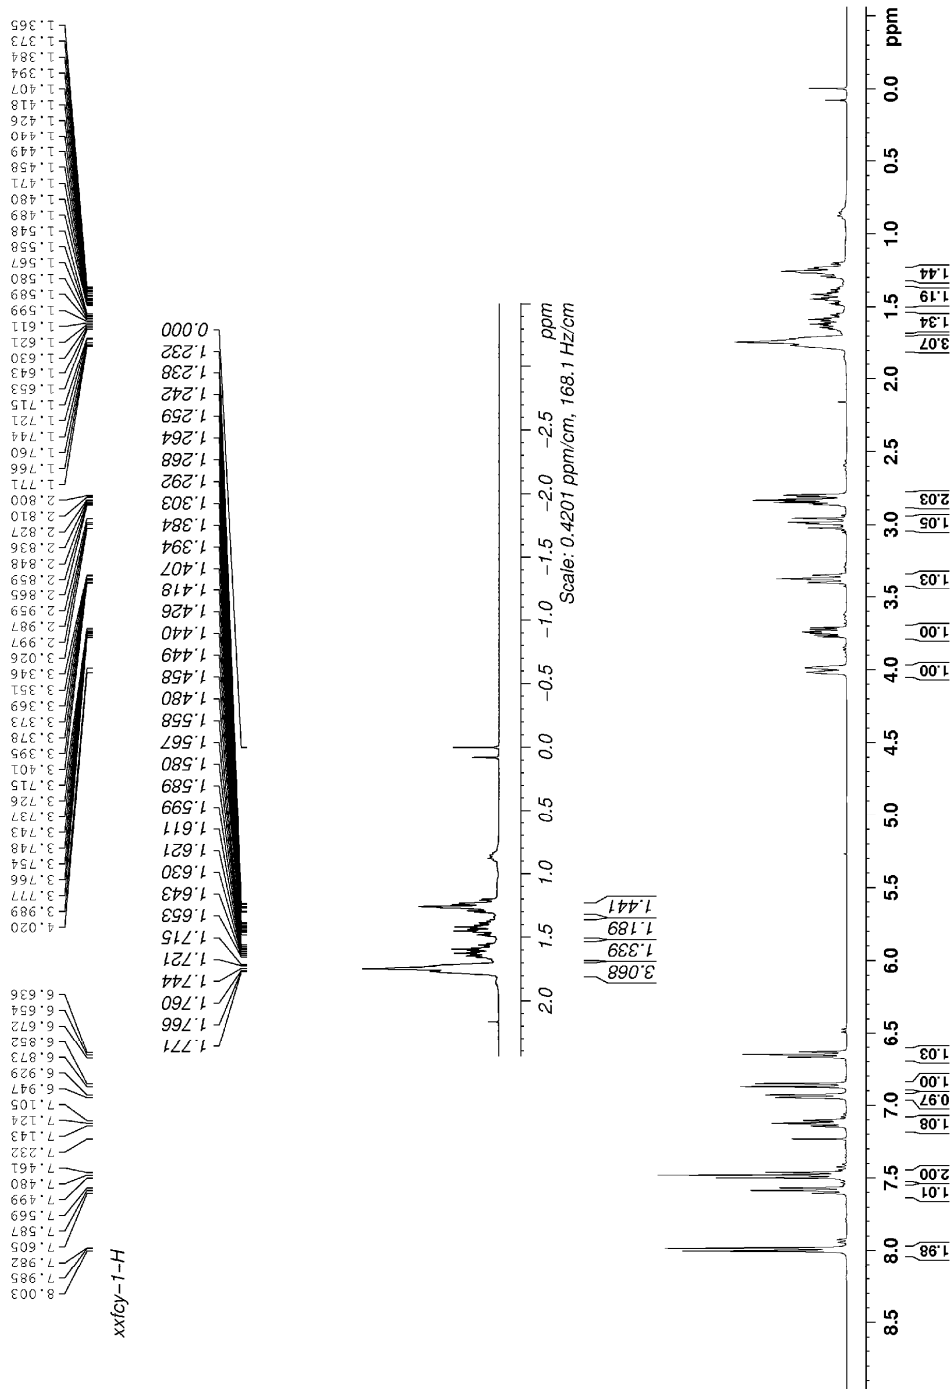

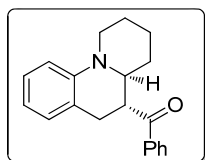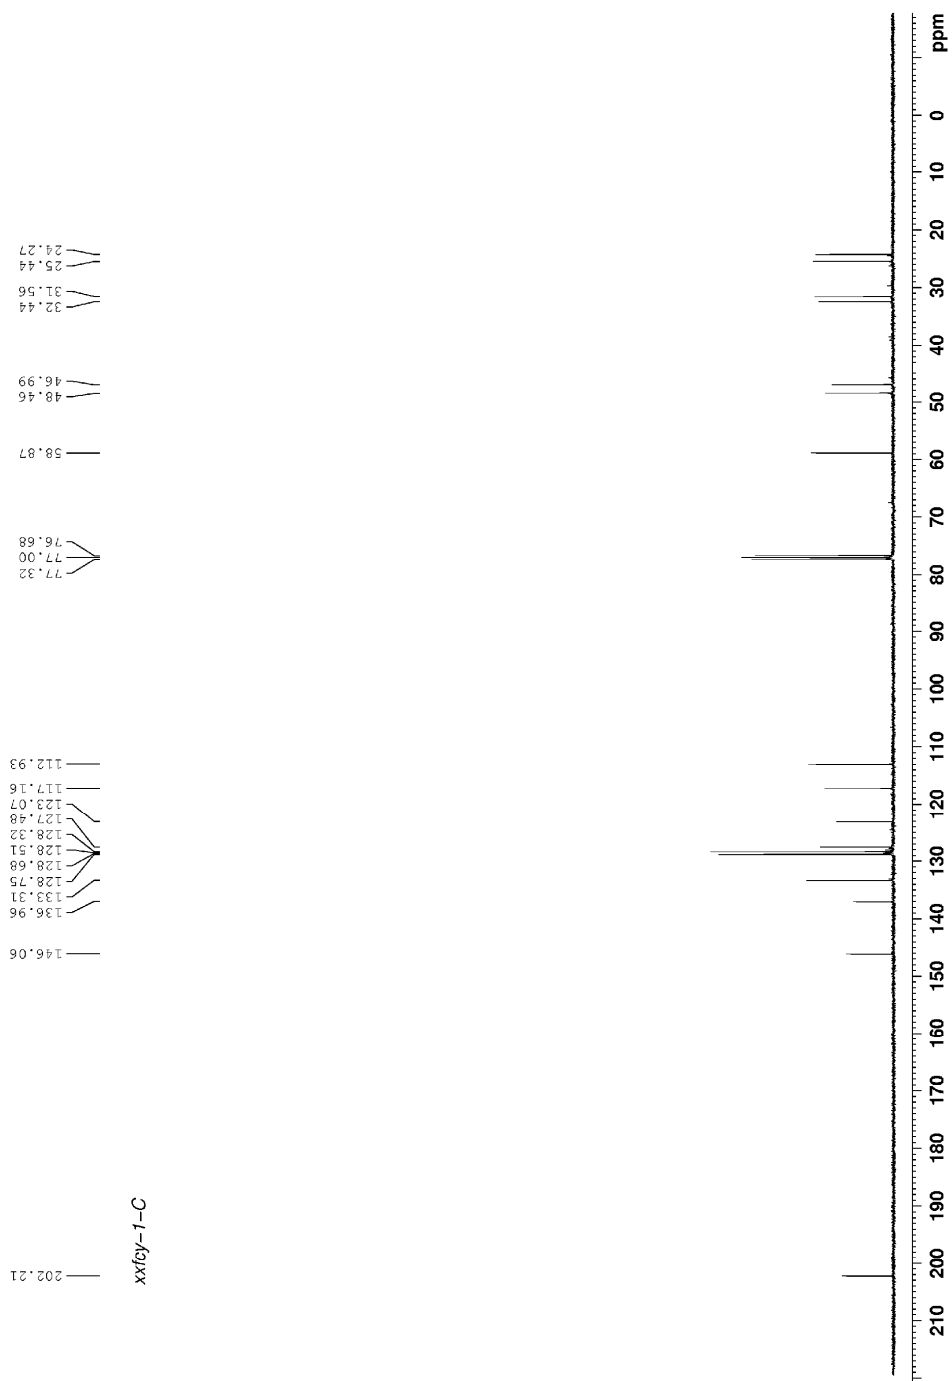



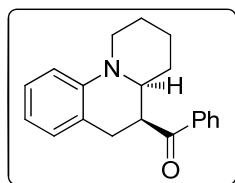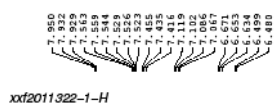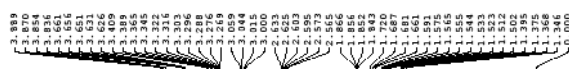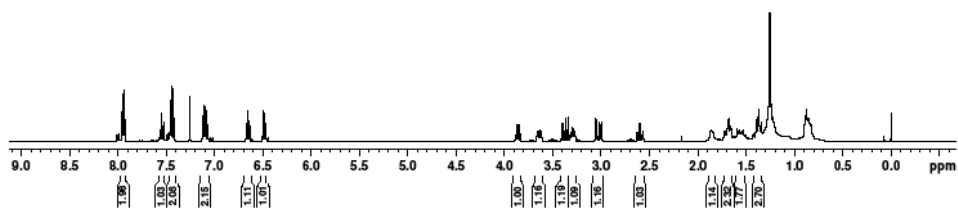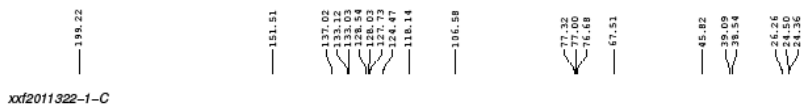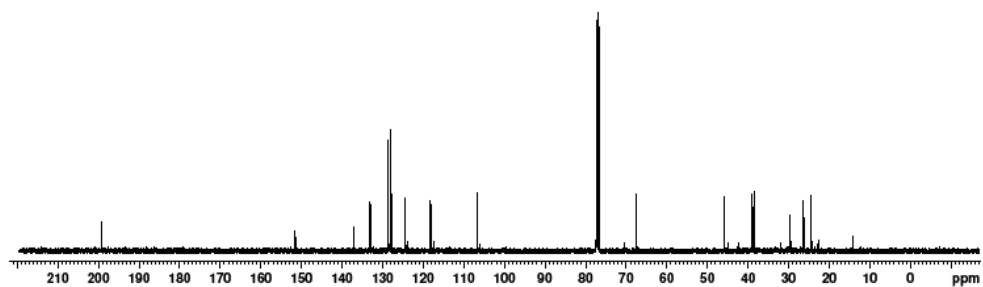

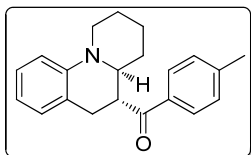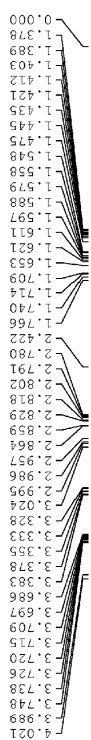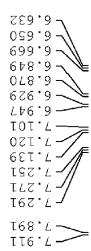

xx12010929-1-H

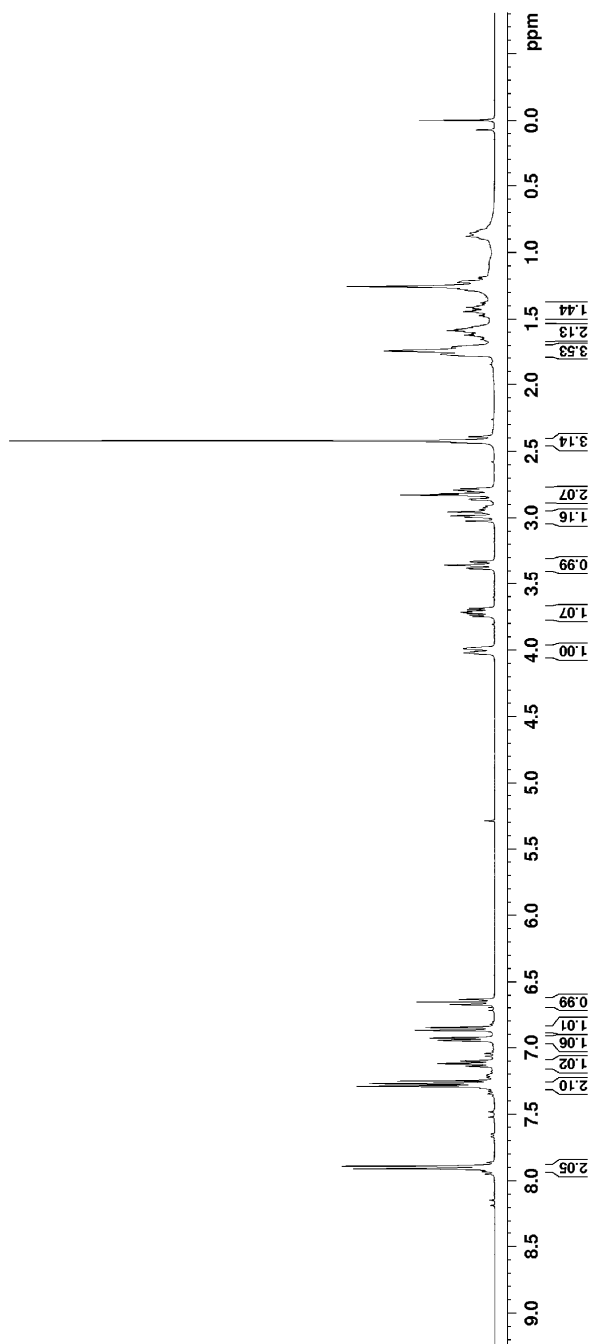

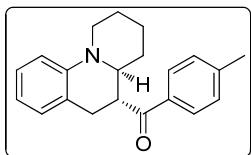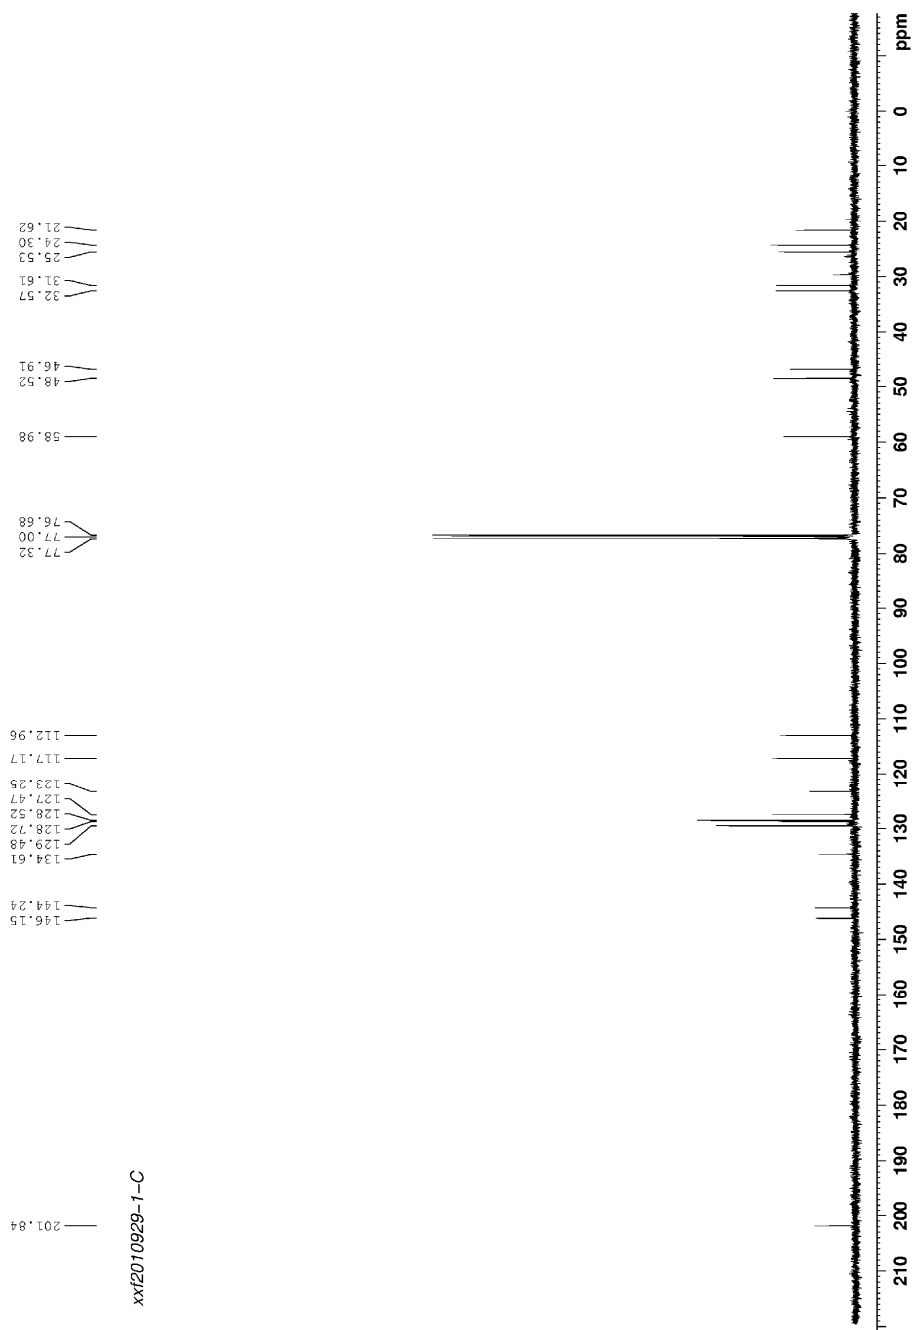

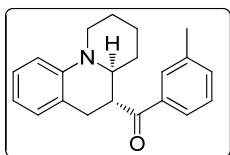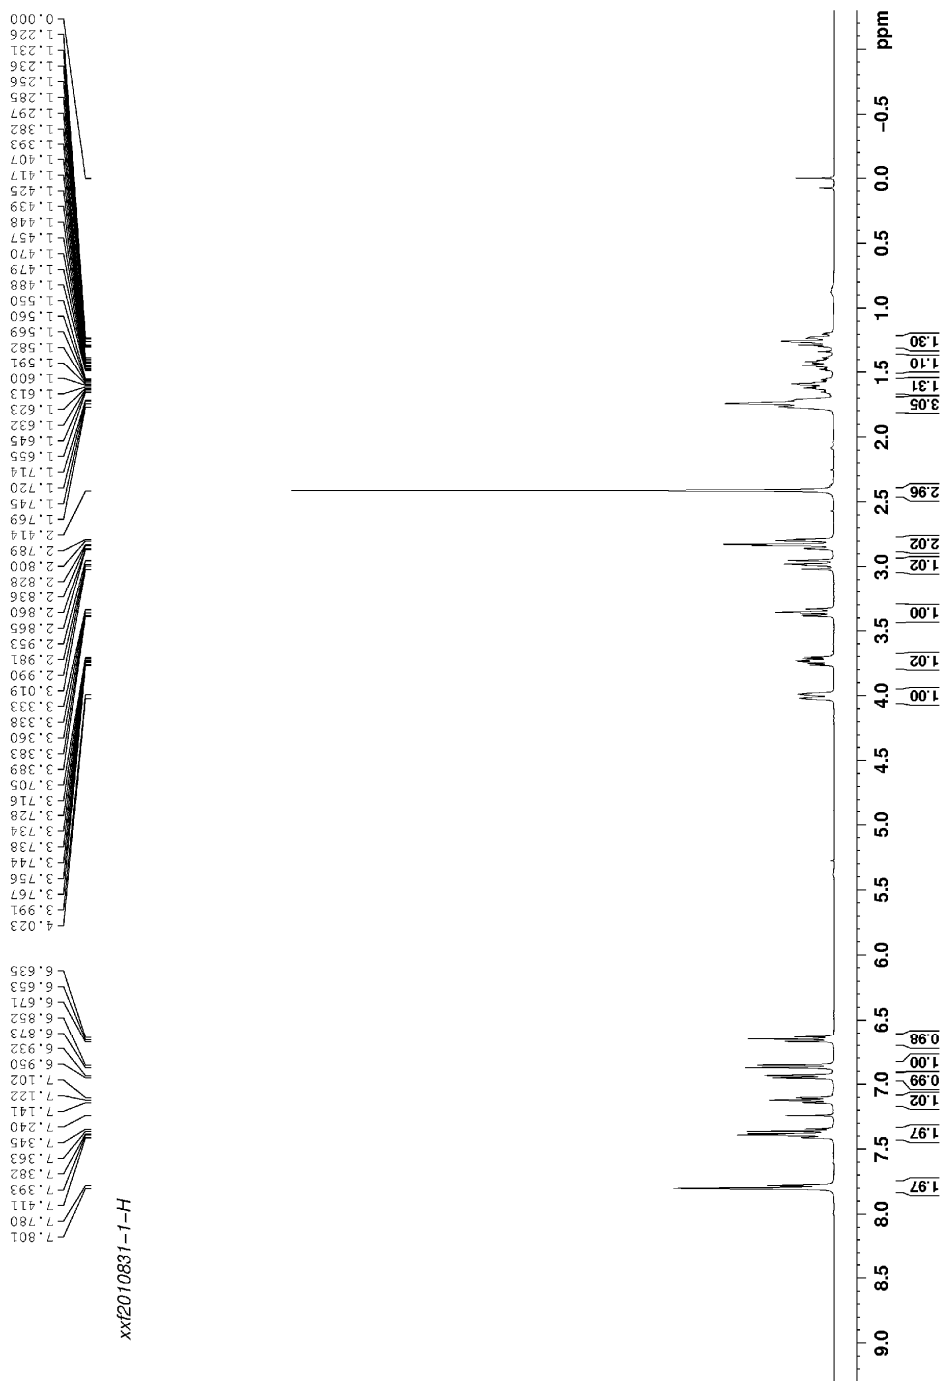

xxf2010831-1-H

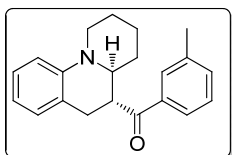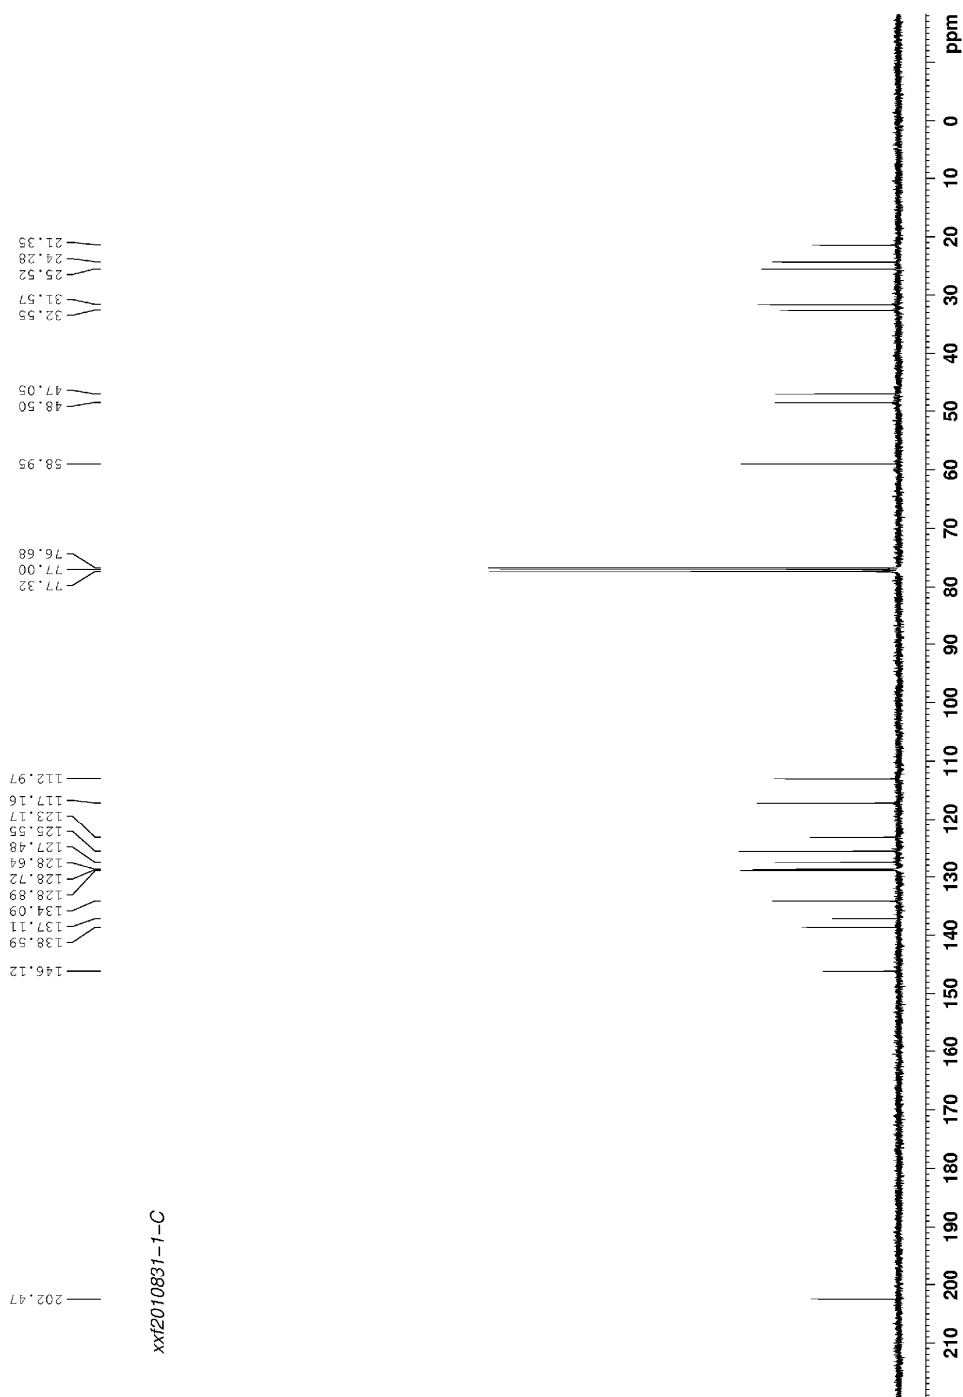

xx12010831-1-C

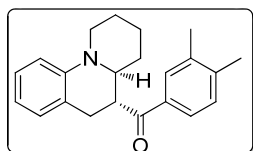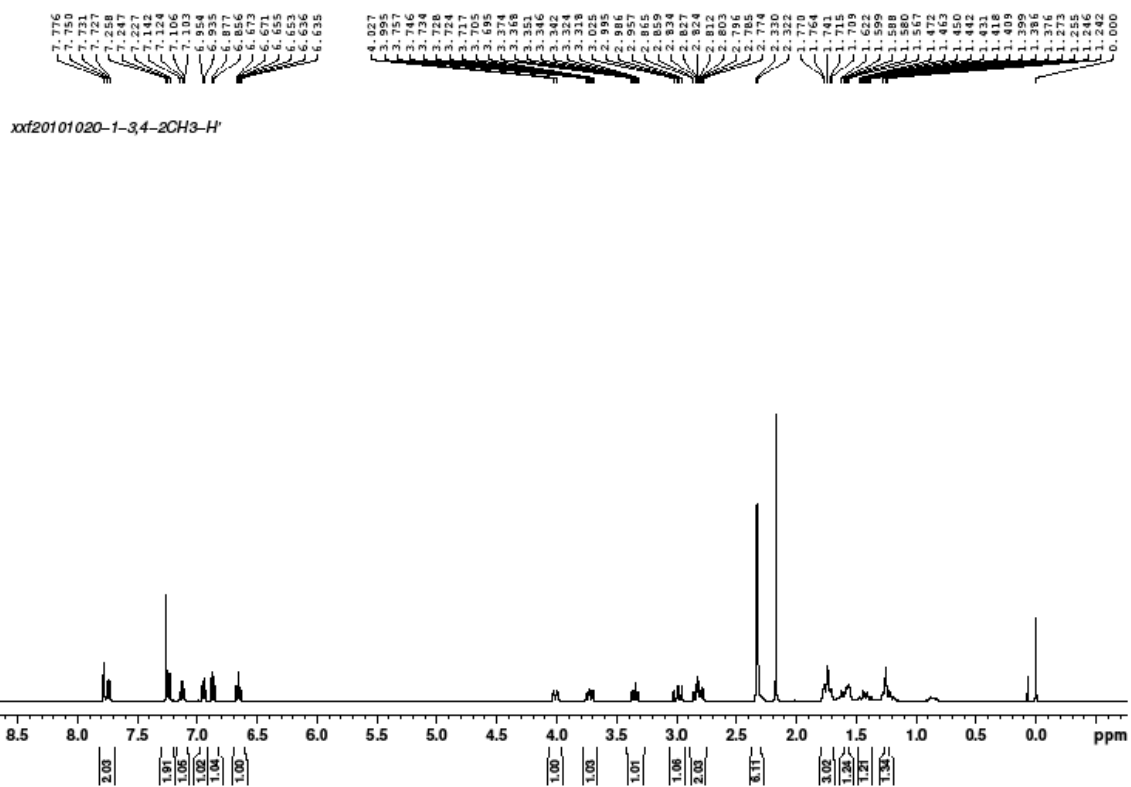

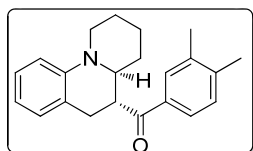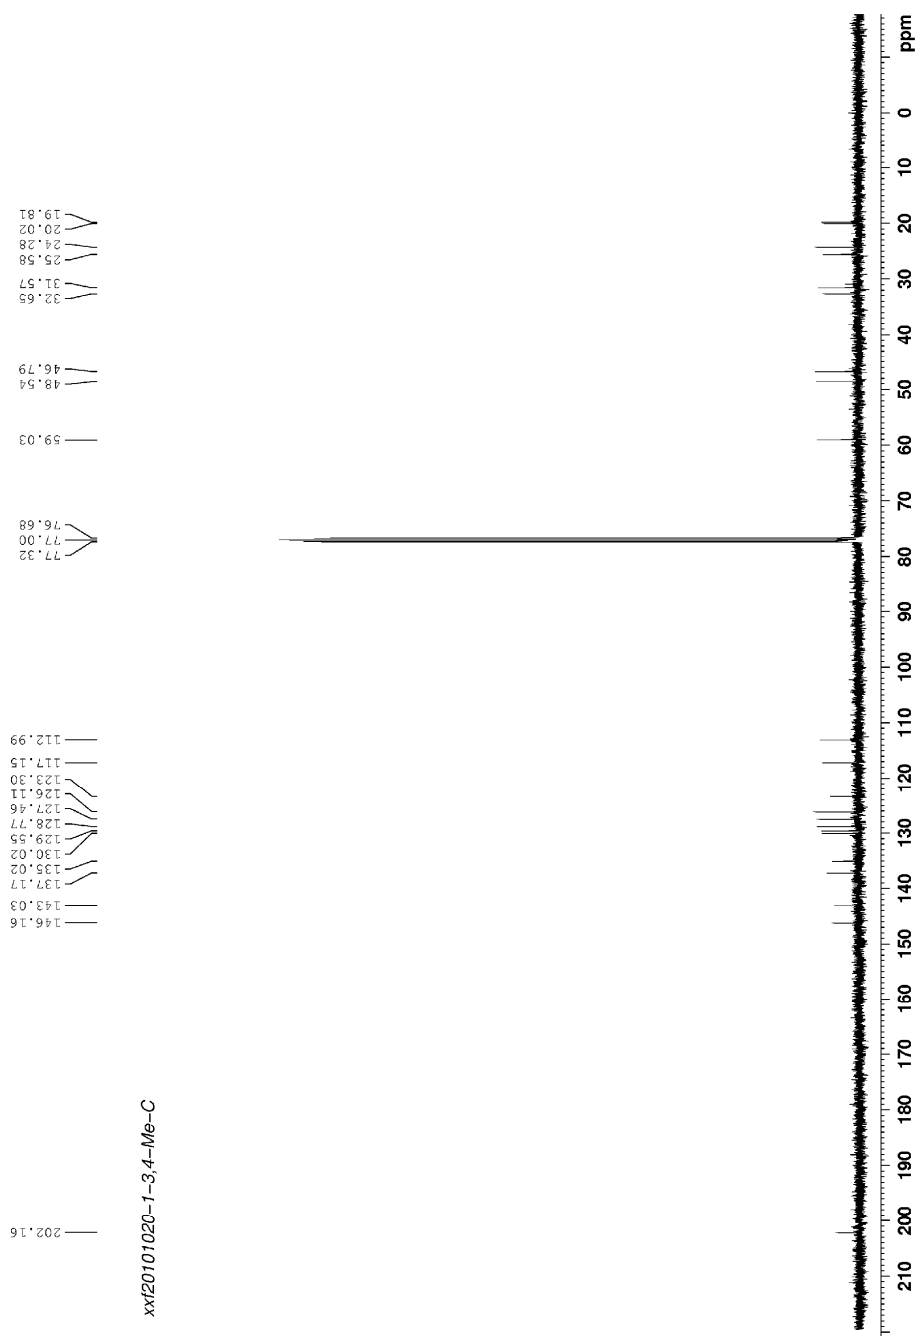

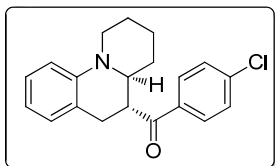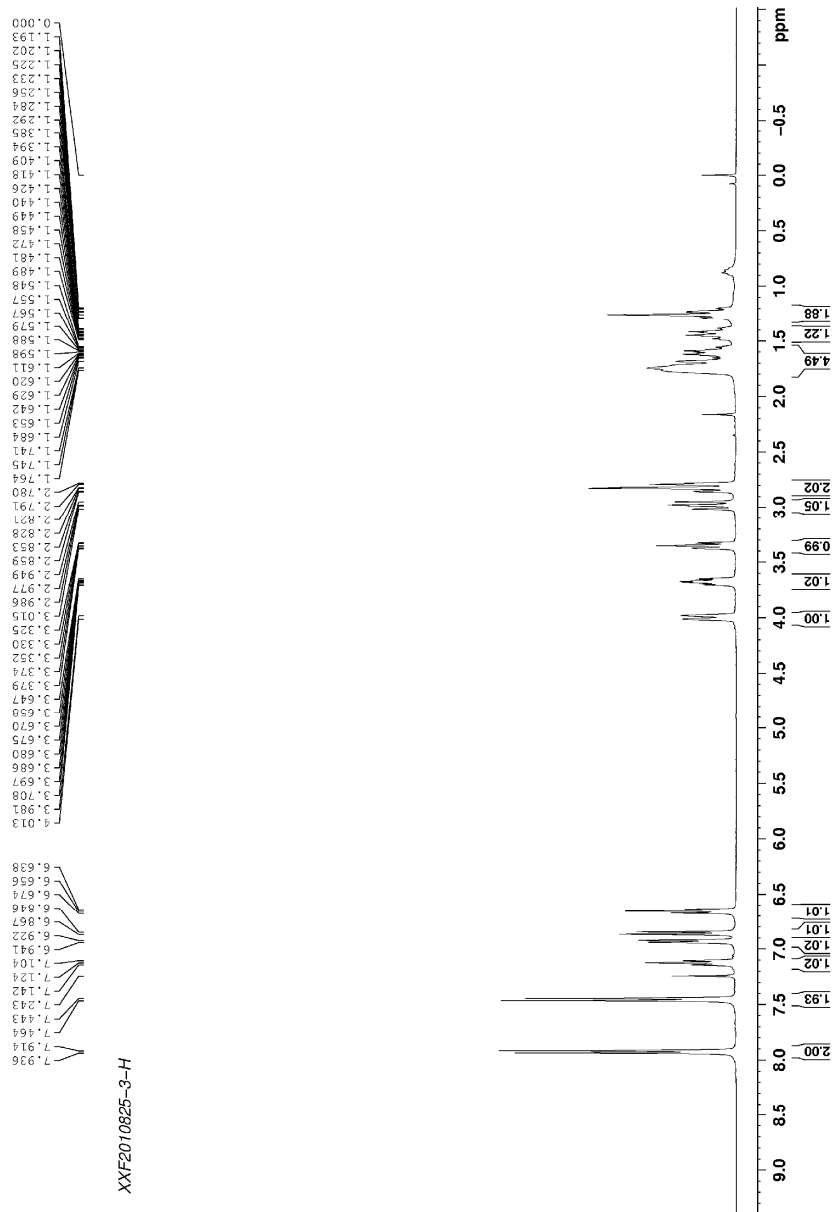



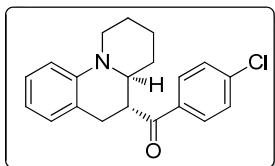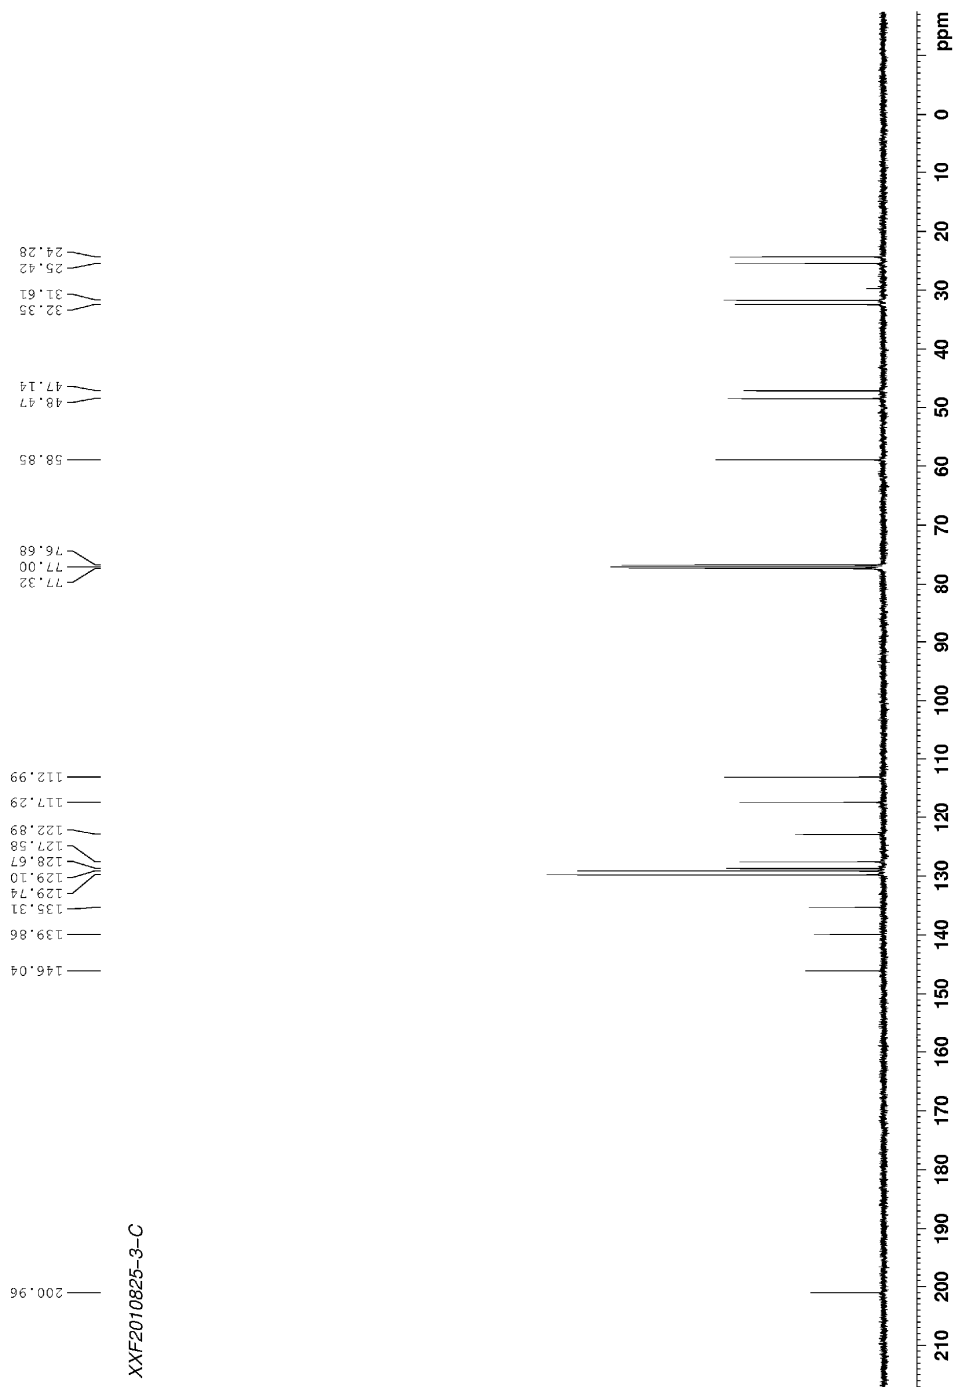

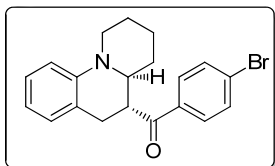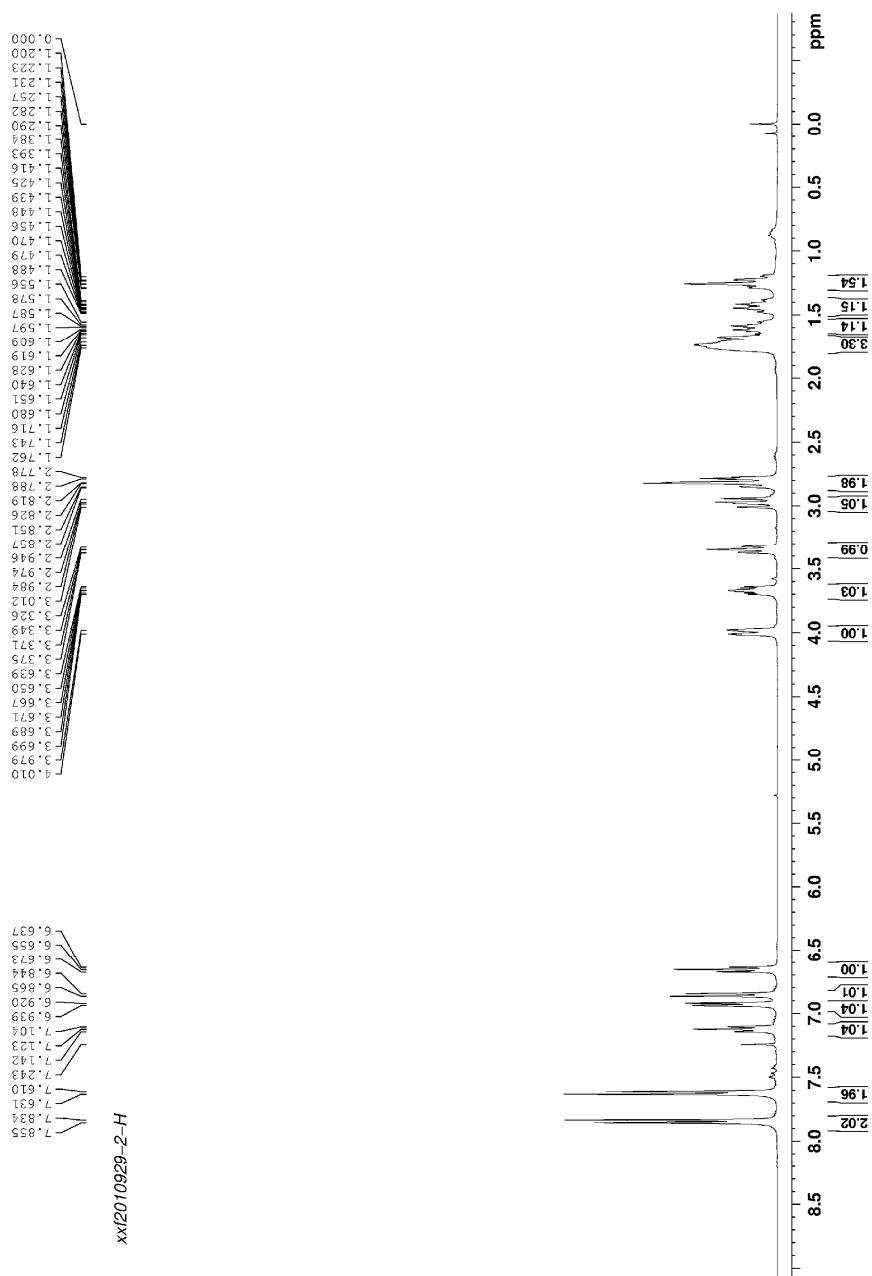

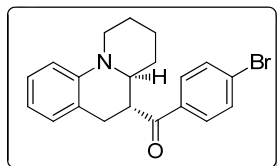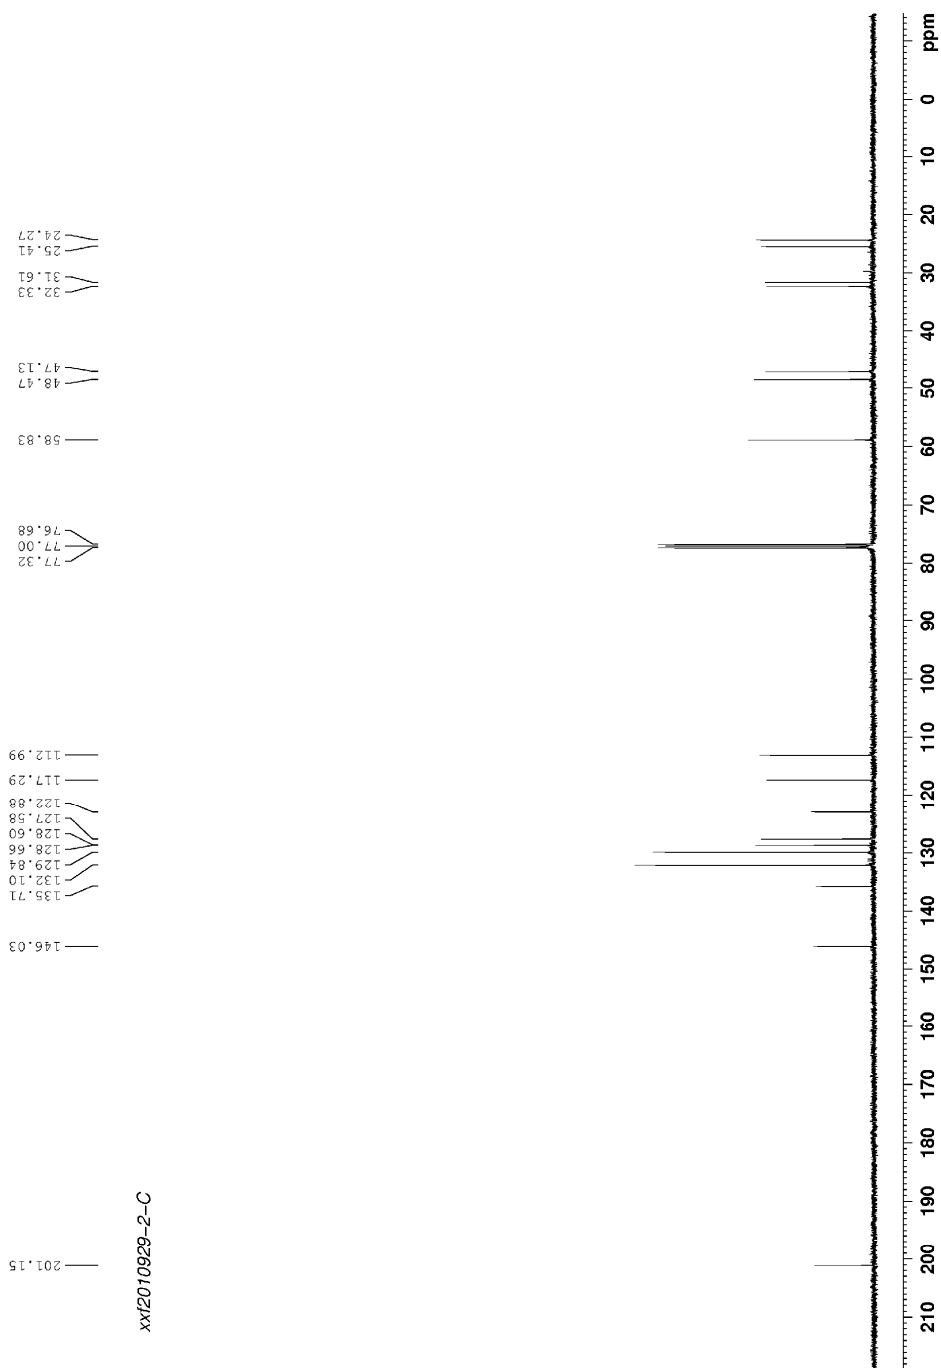

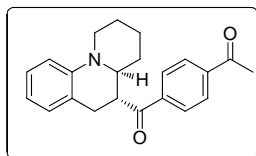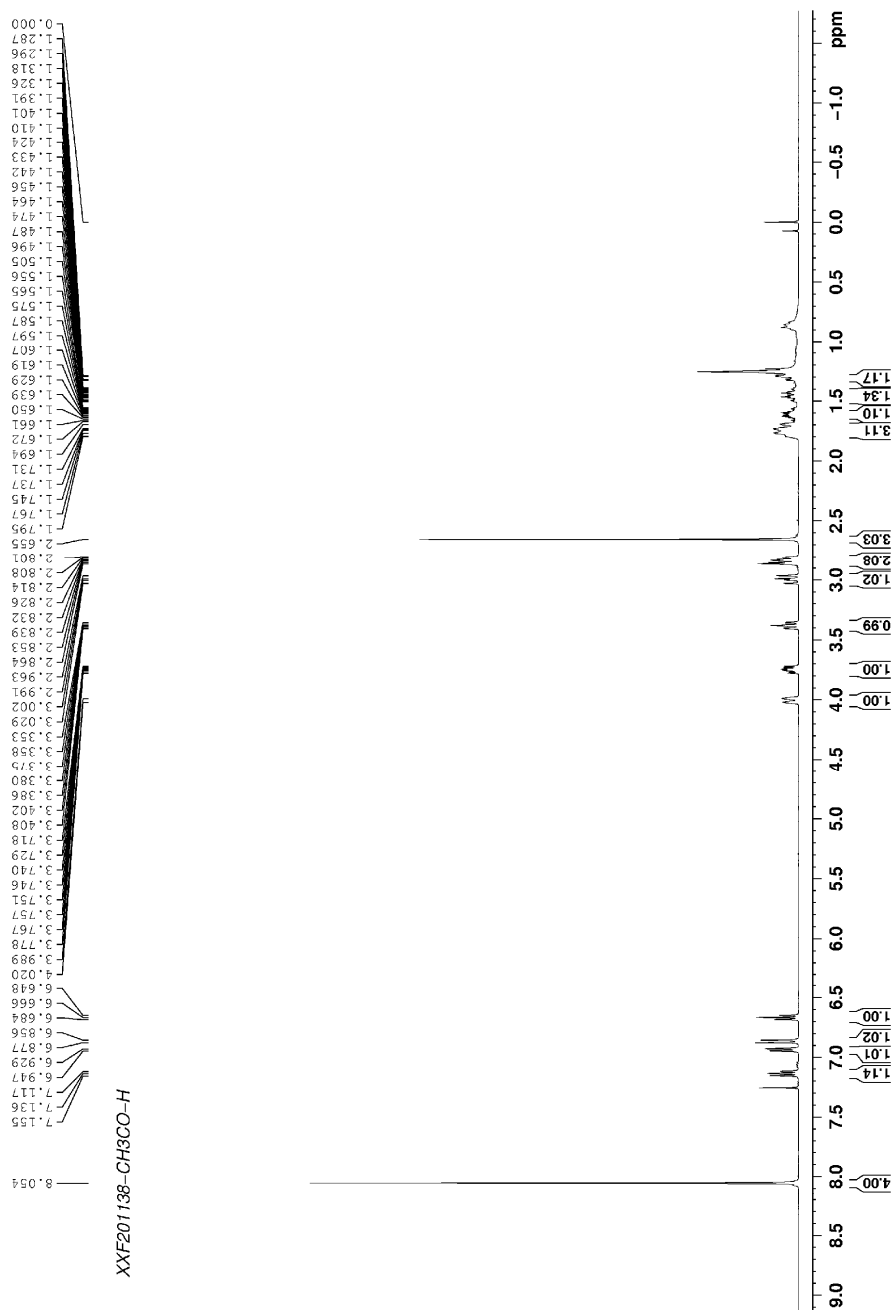

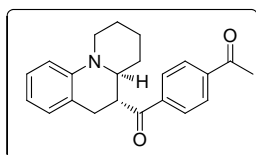

32.18  
31.62  
26.90  
25.35  
24.30

48.46  
47.58

58.79

76.68  
77.00  
77.32

113.00  
117.33  
122.80  
127.63  
128.52  
128.65  
128.66  
140.10  
140.26  
146.00

197.37  
201.73

XXF201138-CH3CO-C

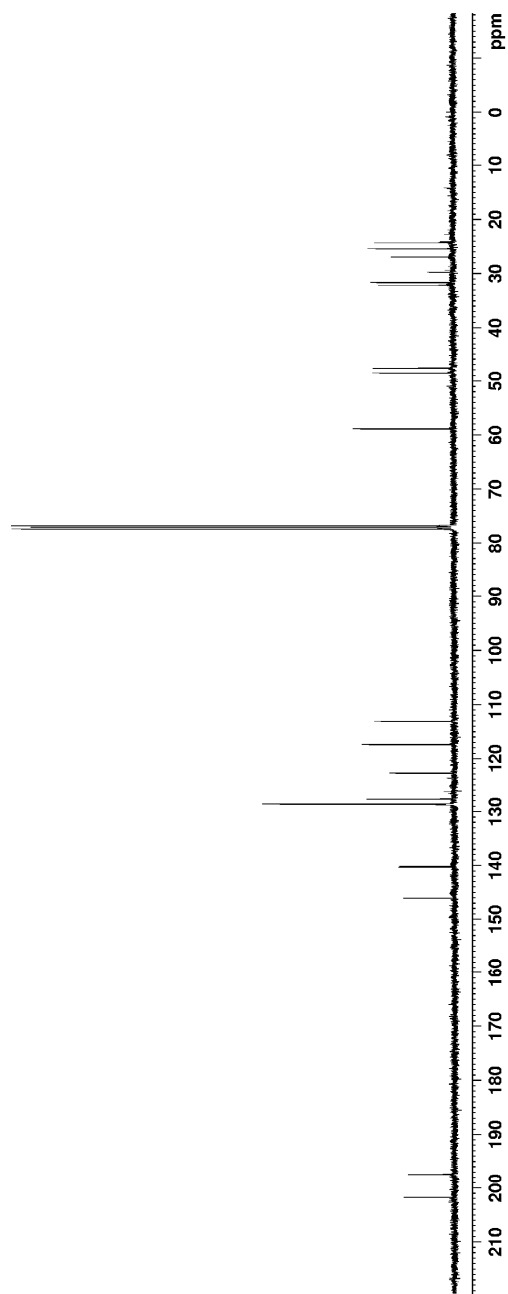

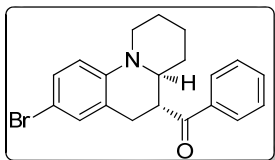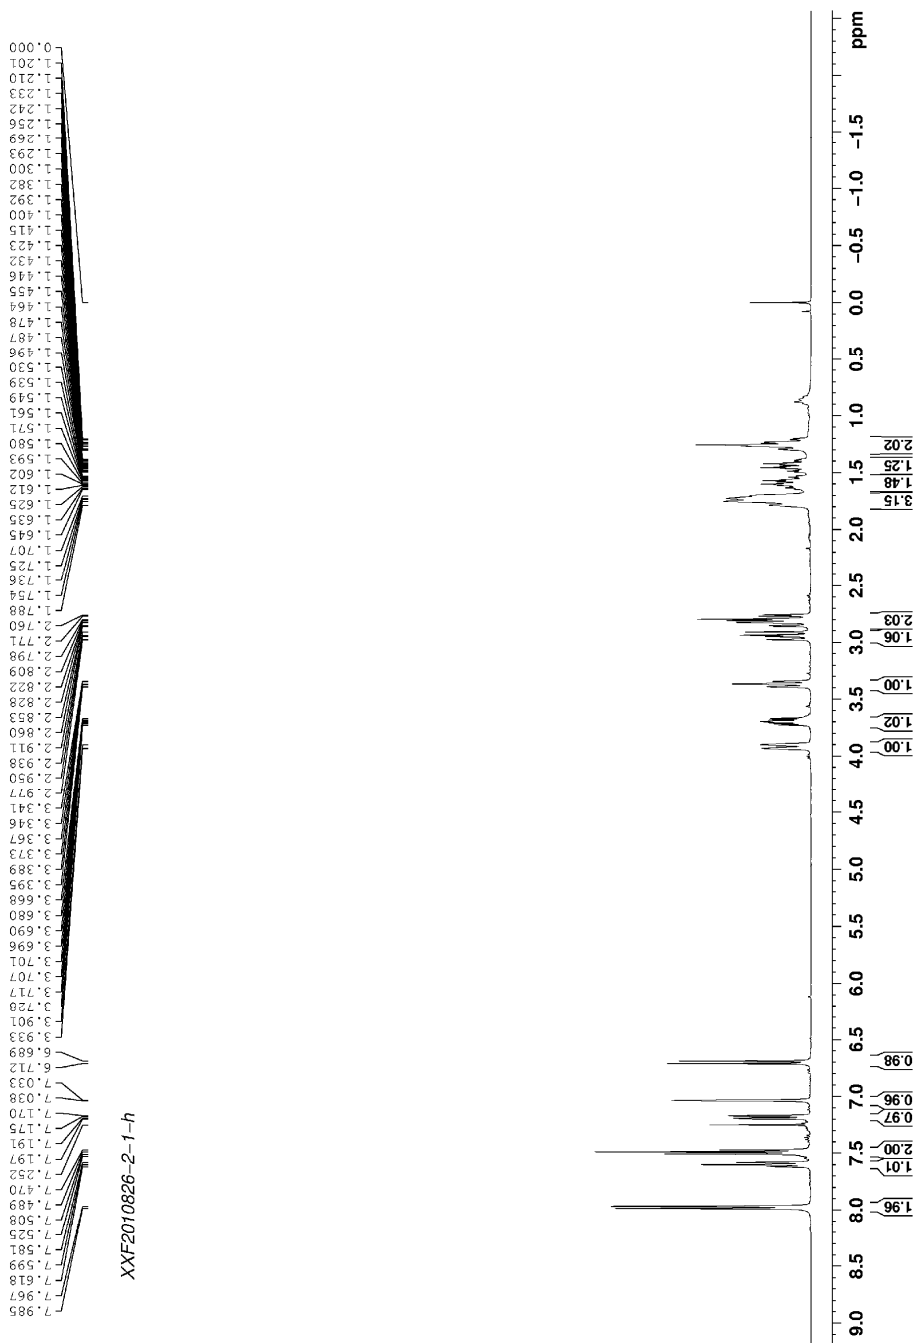

XXF2010826-2-1-h

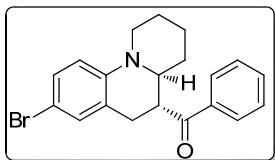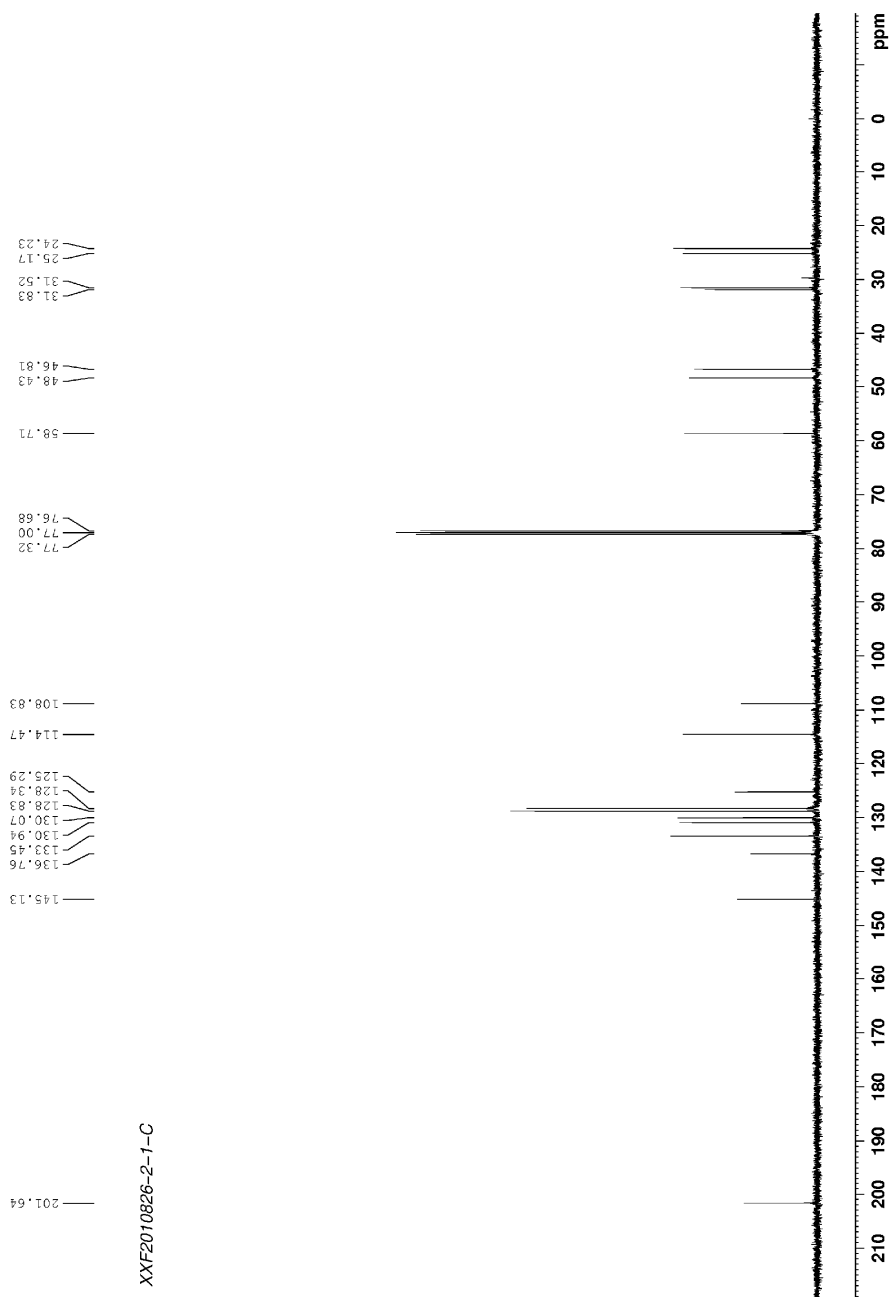

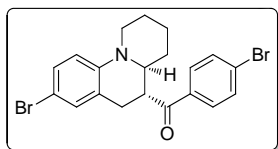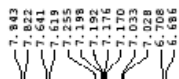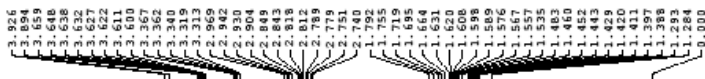

xxf2010105-1-1-H'

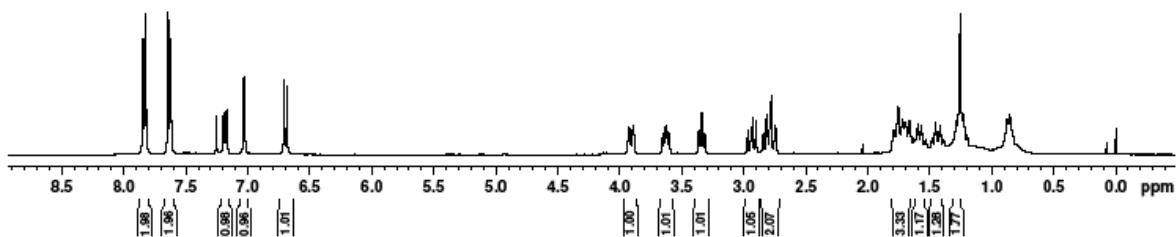



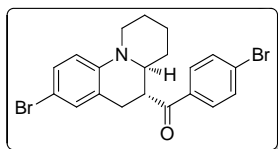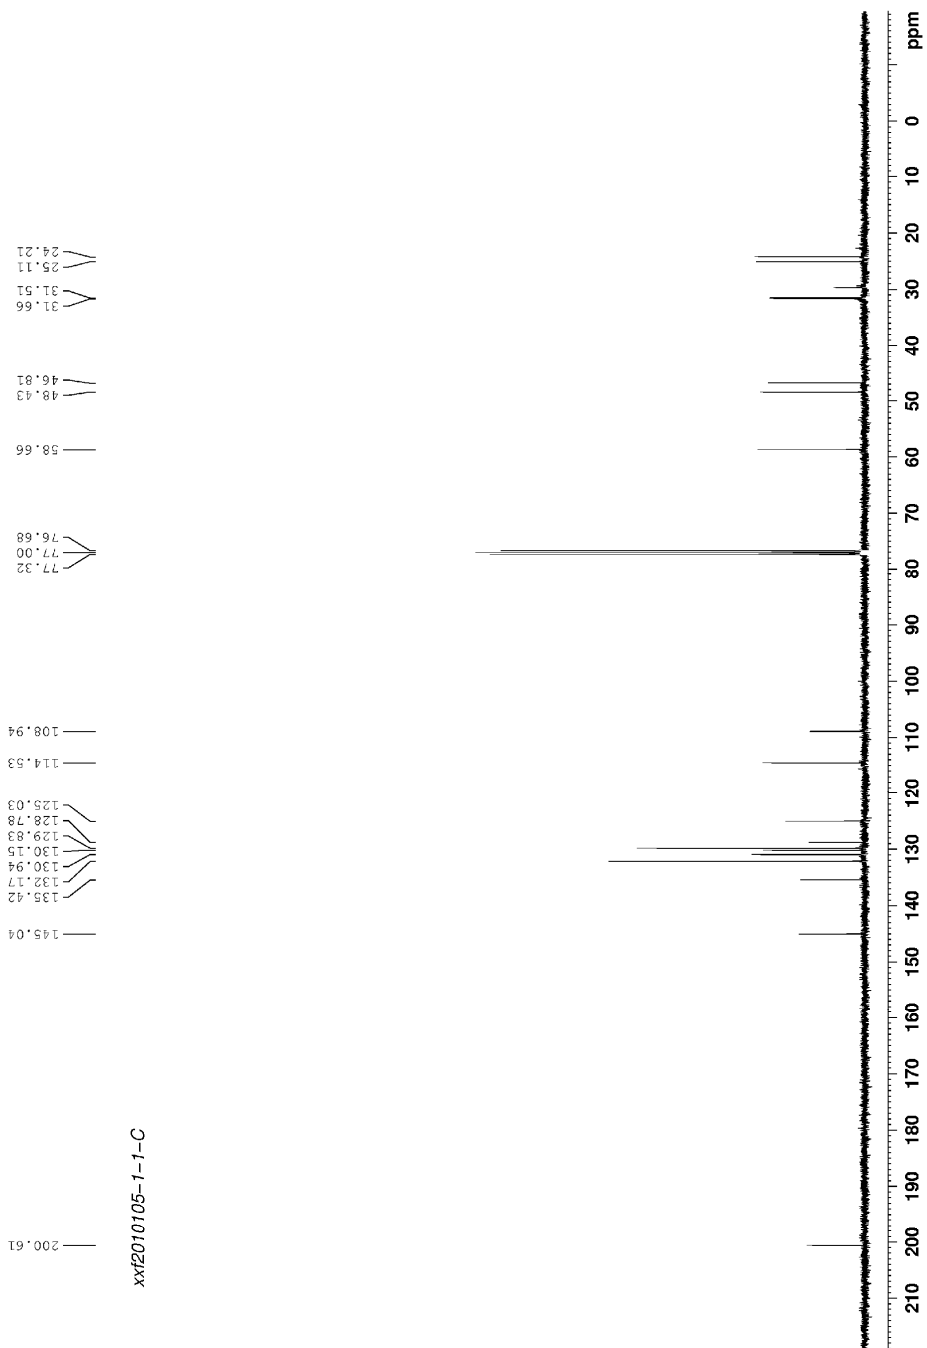

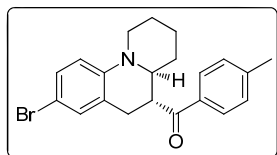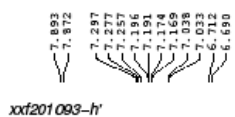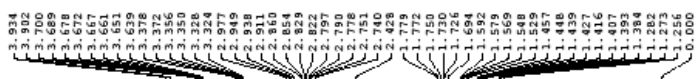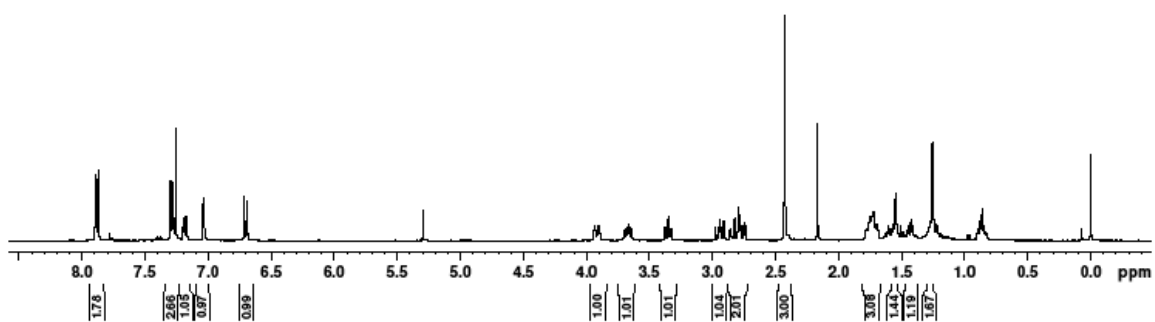

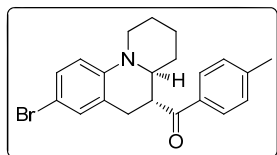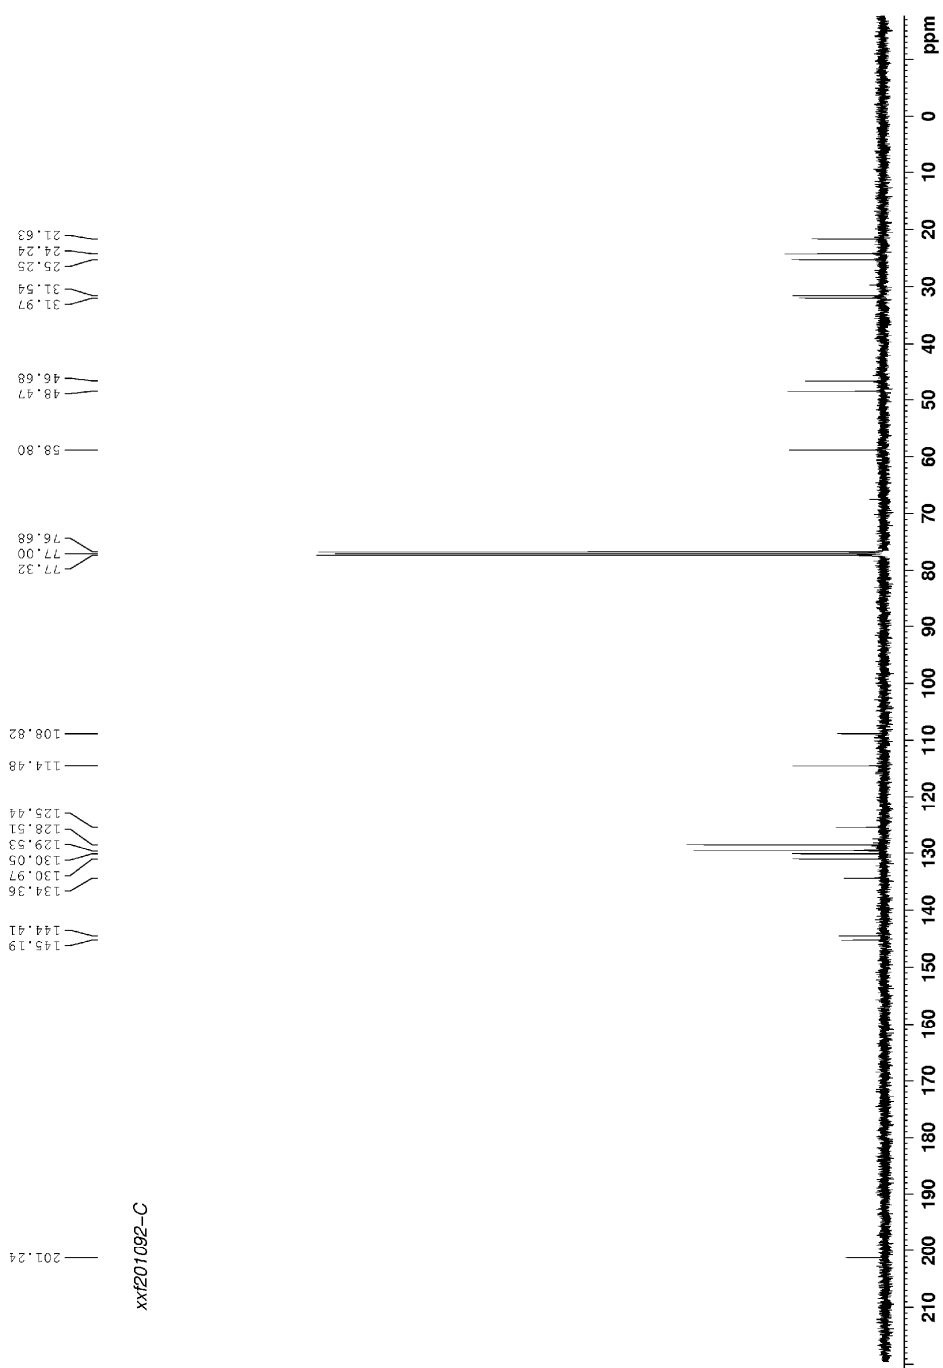

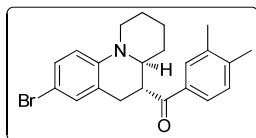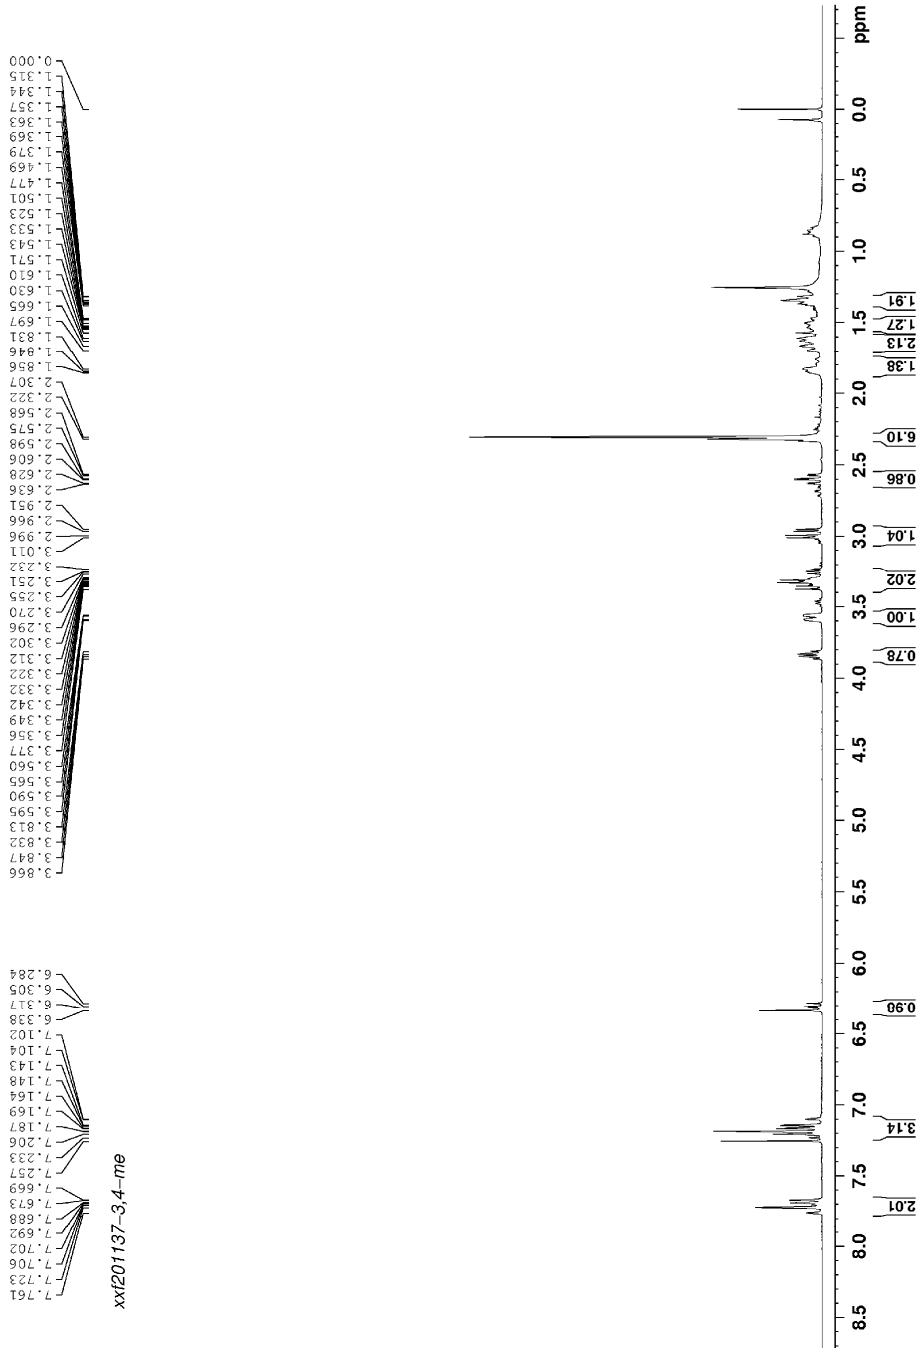



19.75  
20.01  
24.12  
24.27  
26.00

38.16  
38.96  
45.66

67.47  
76.68  
77.00  
77.32

107.81  
109.49

125.74  
125.81  
127.12  
127.46  
129.18  
129.81  
129.89  
130.26  
134.75  
135.58  
136.95  
142.74  
150.52

198.47

xx201137-3,4-me-C

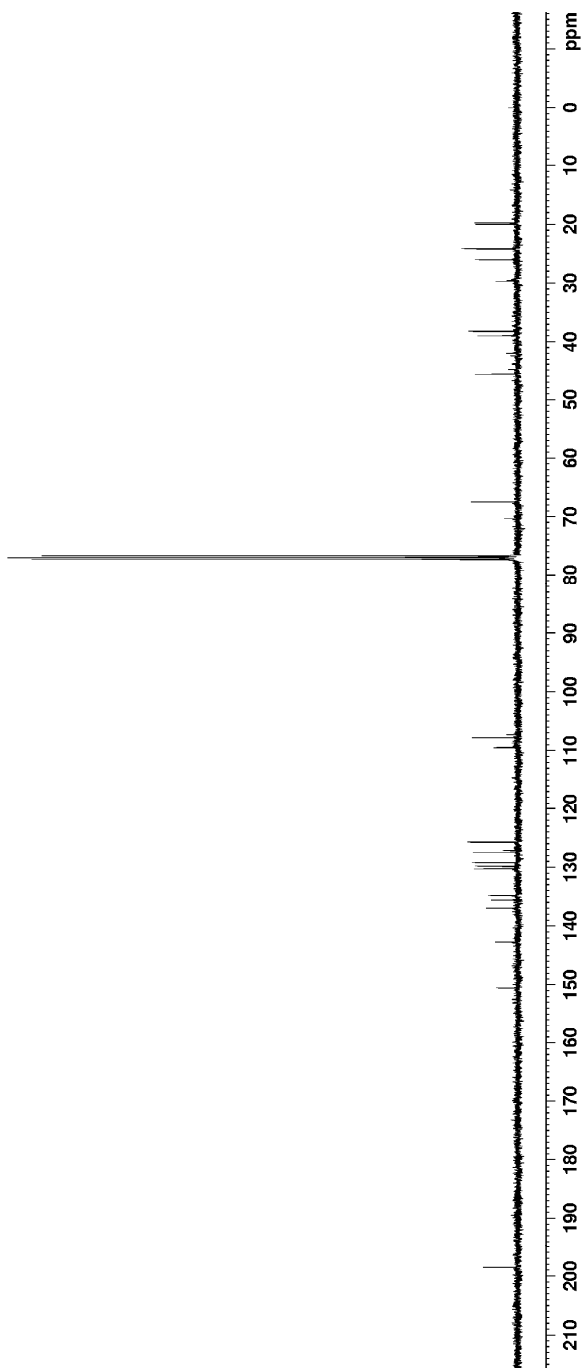

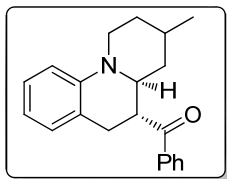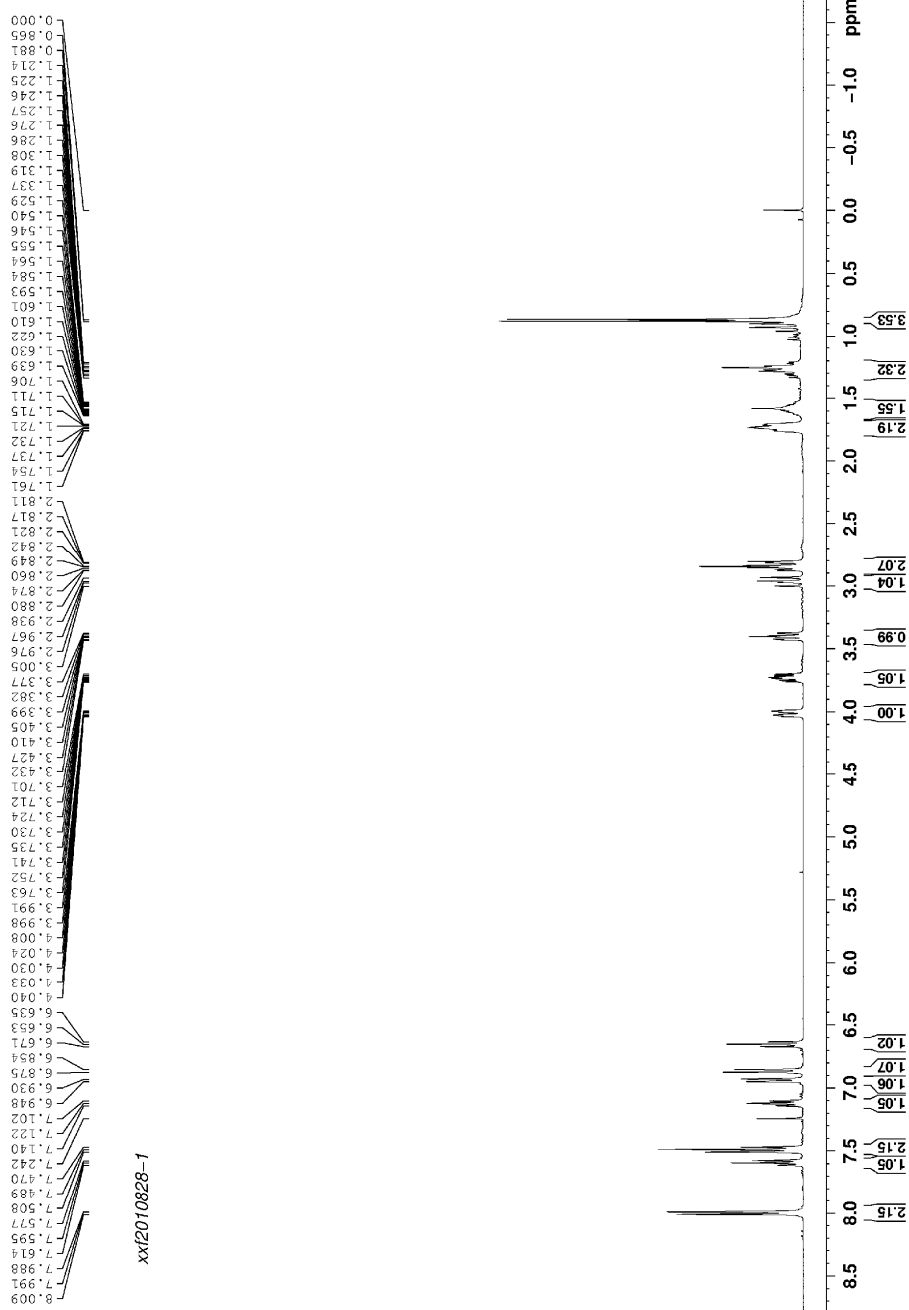

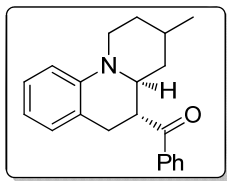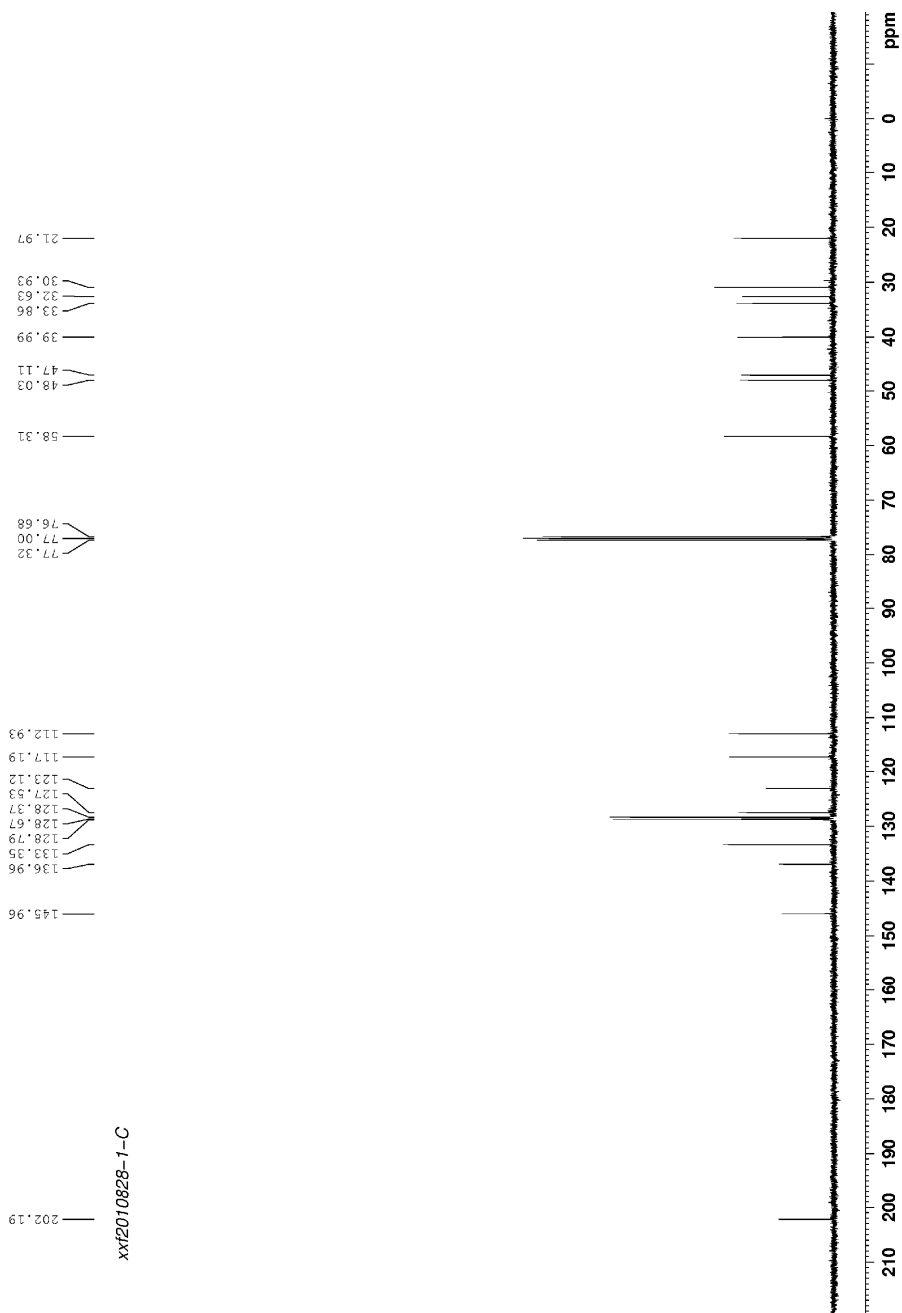

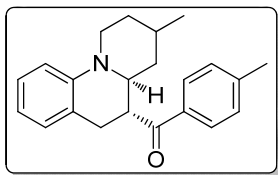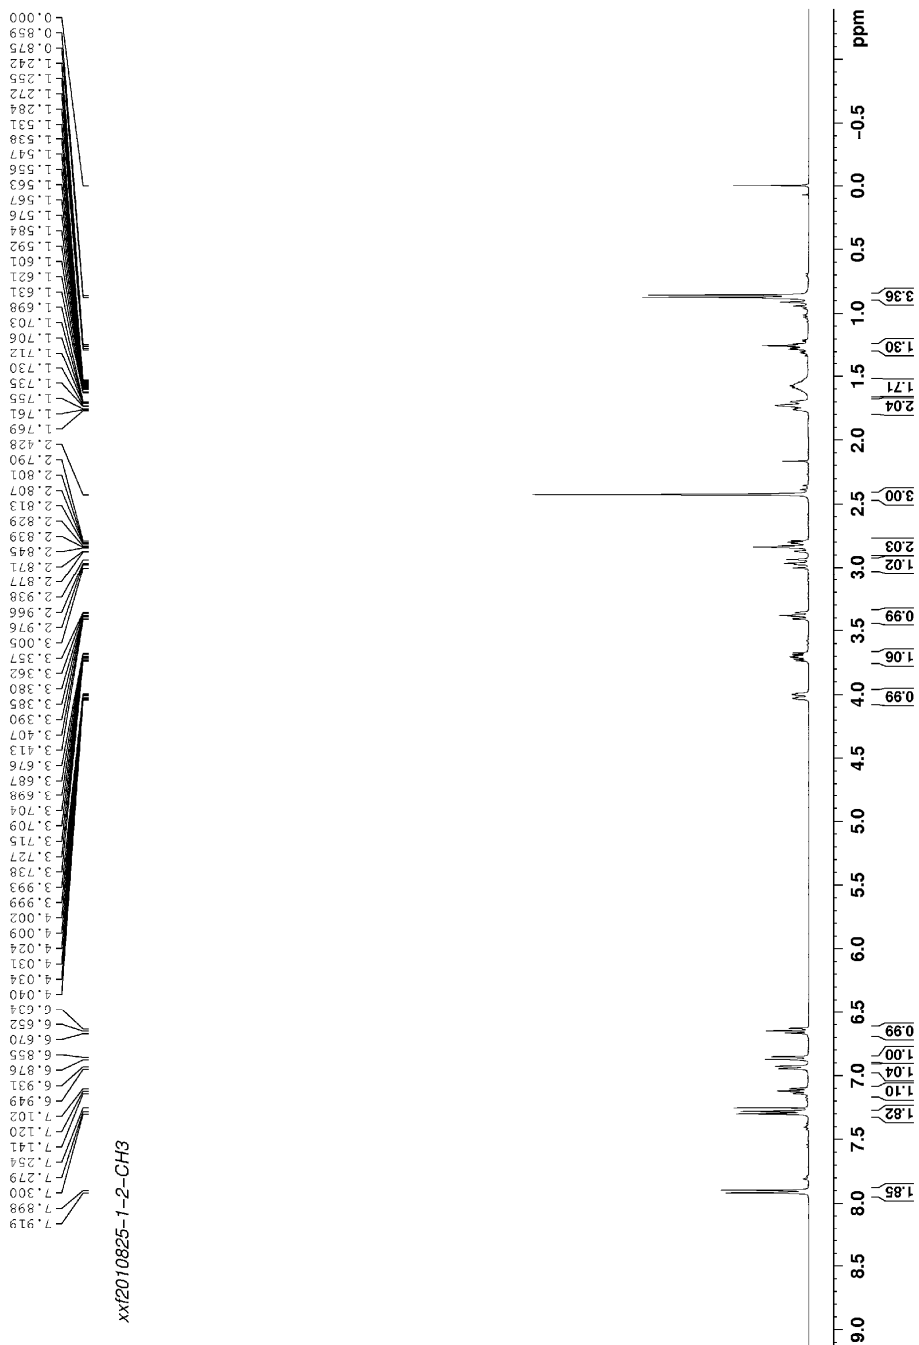



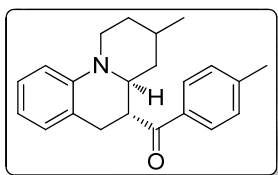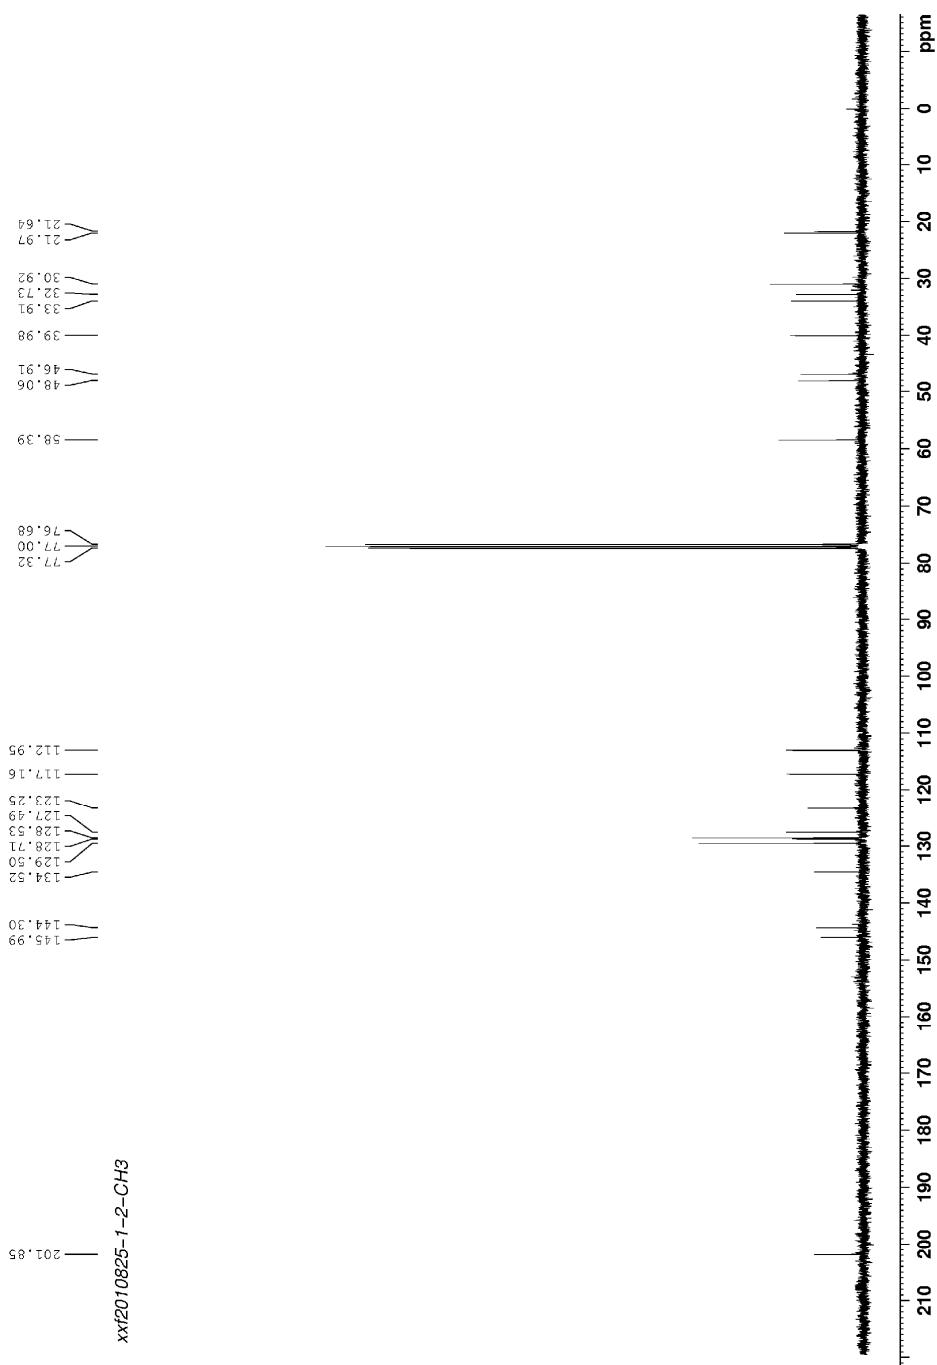

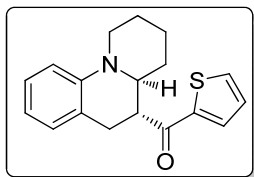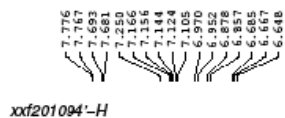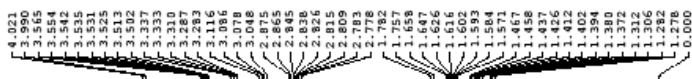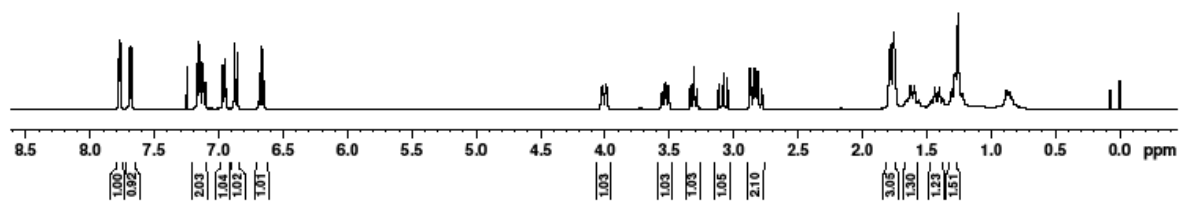

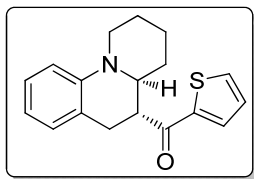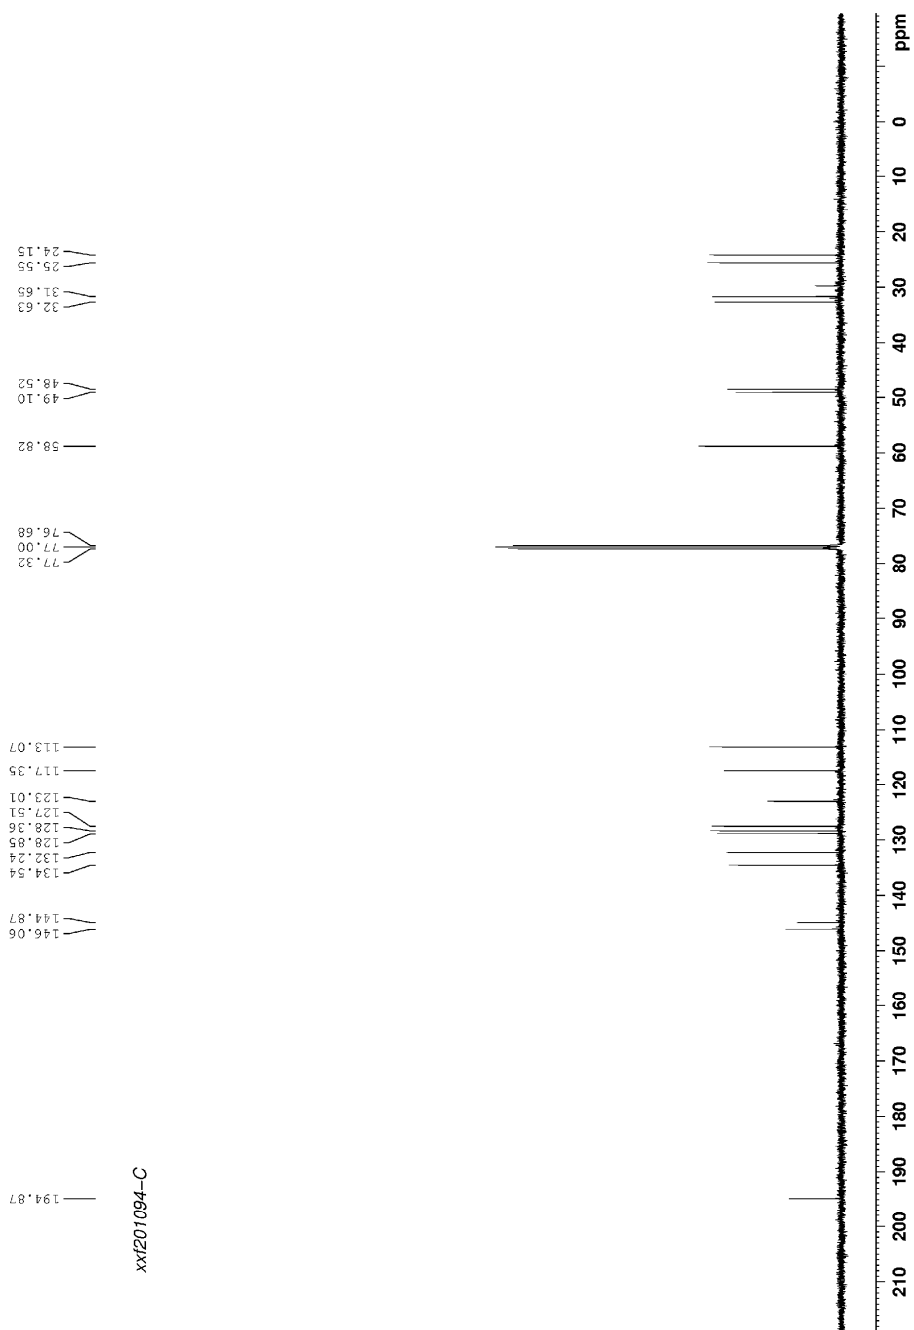

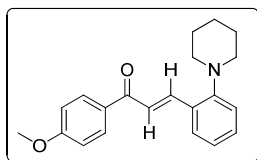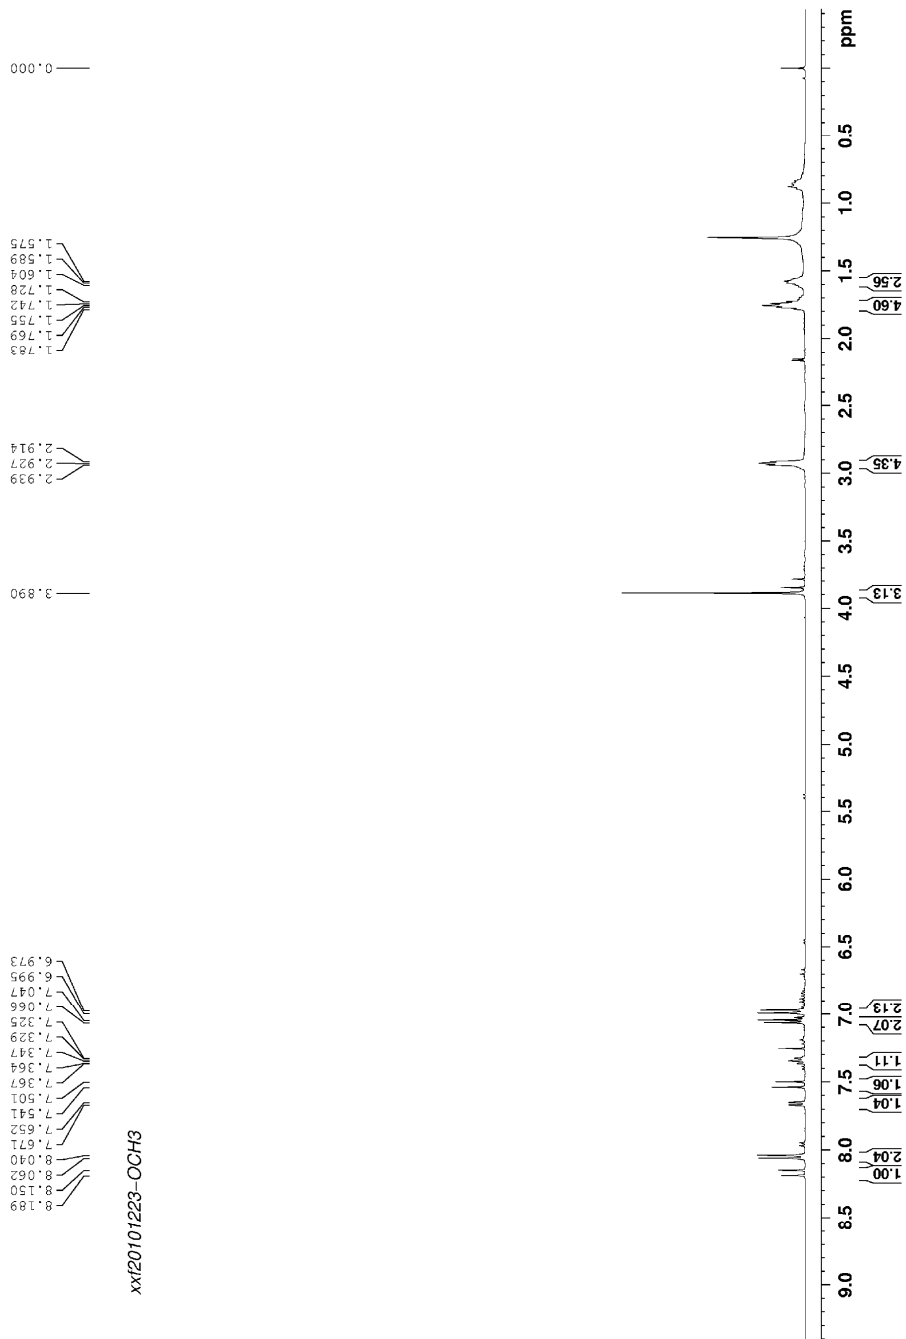

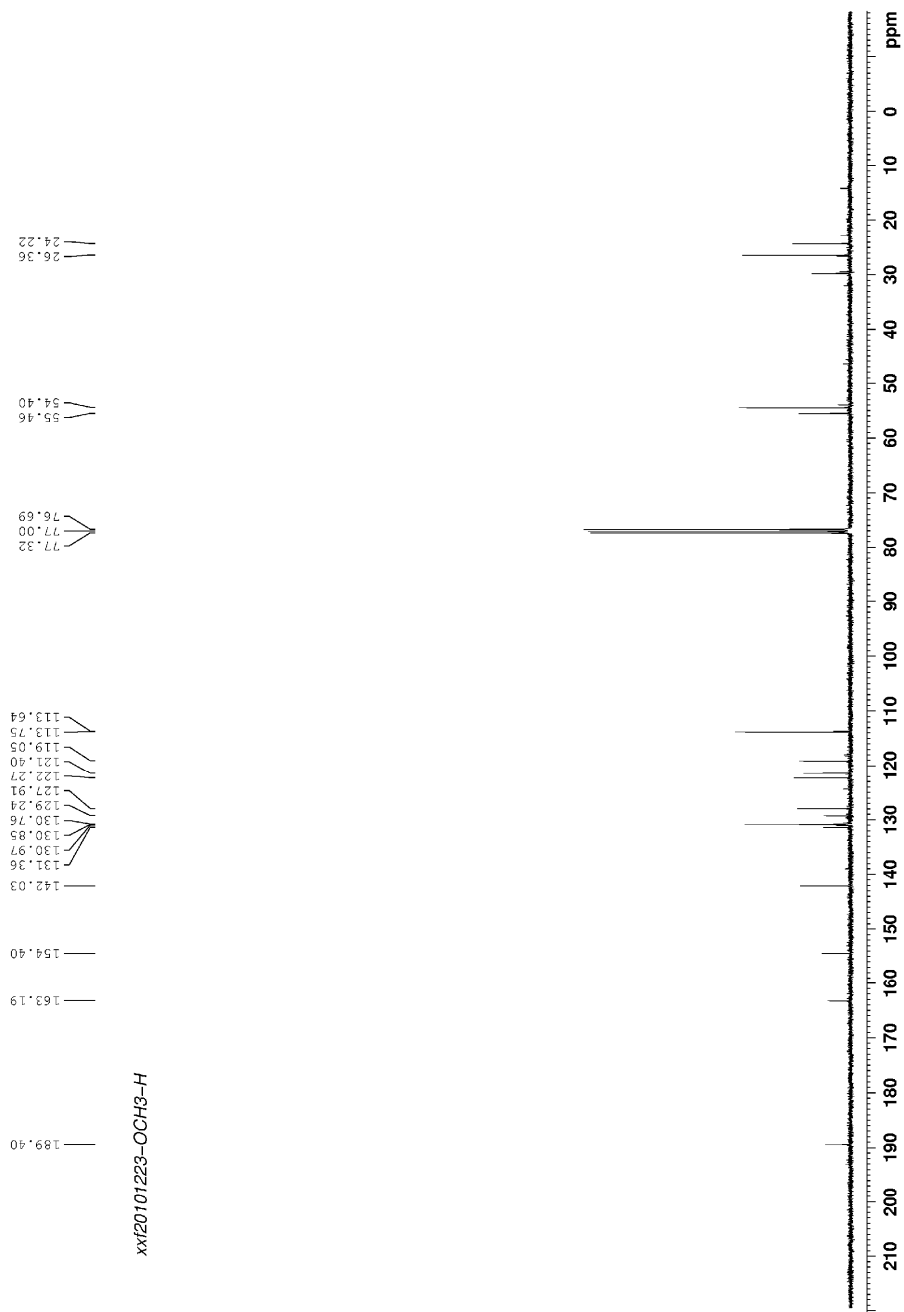

D-2a

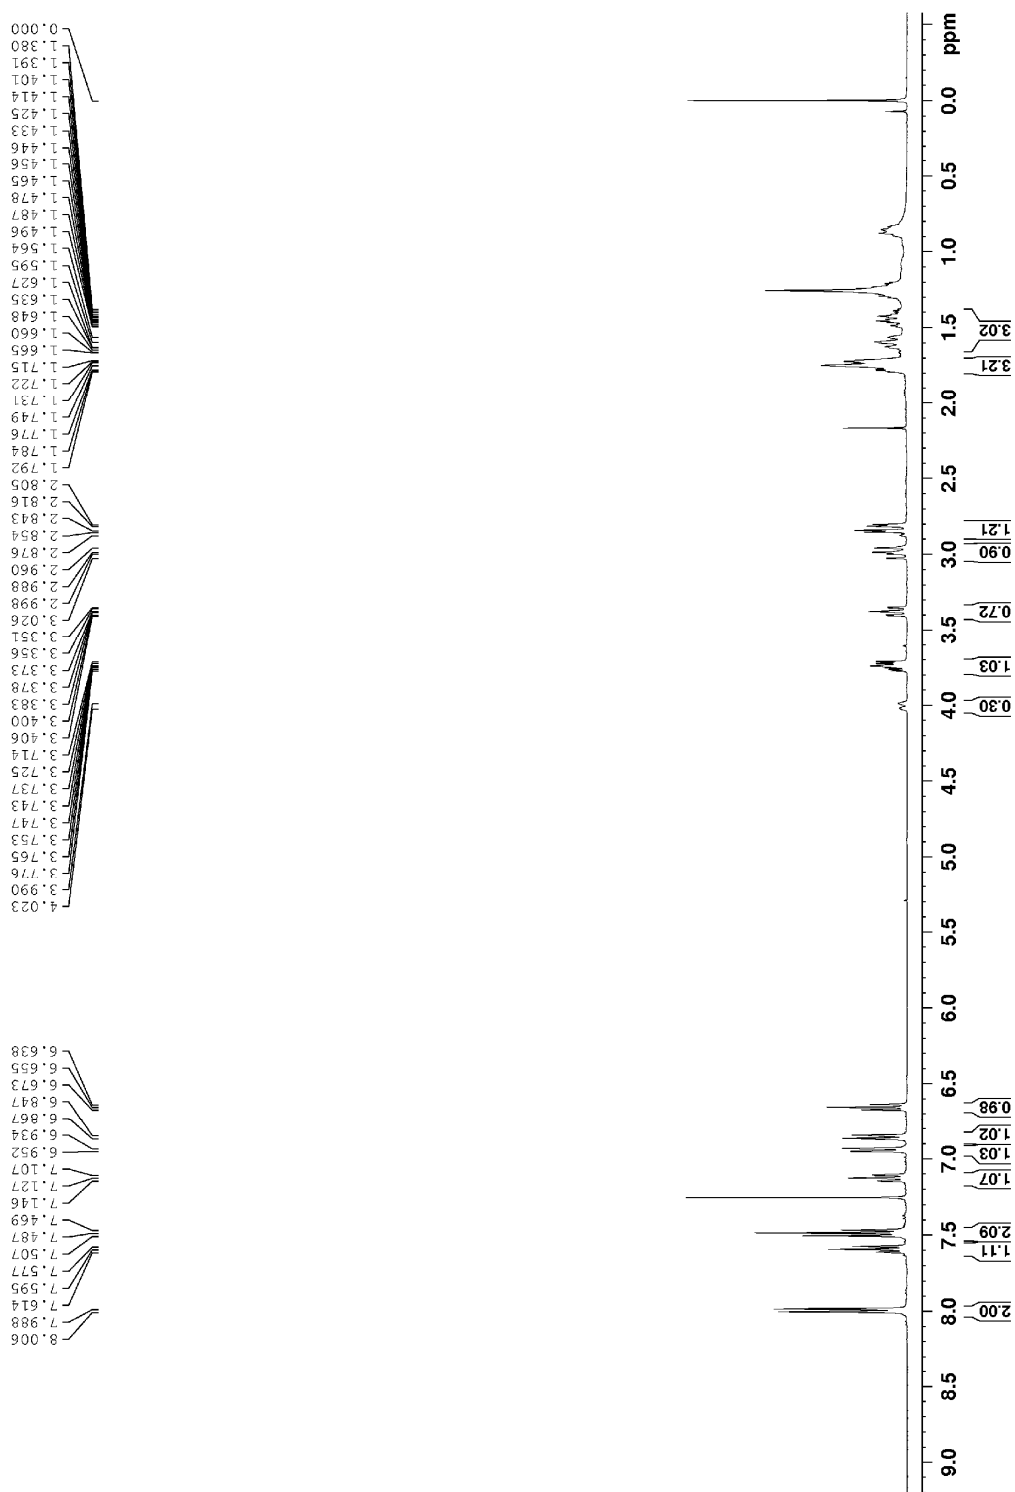

### D-2a

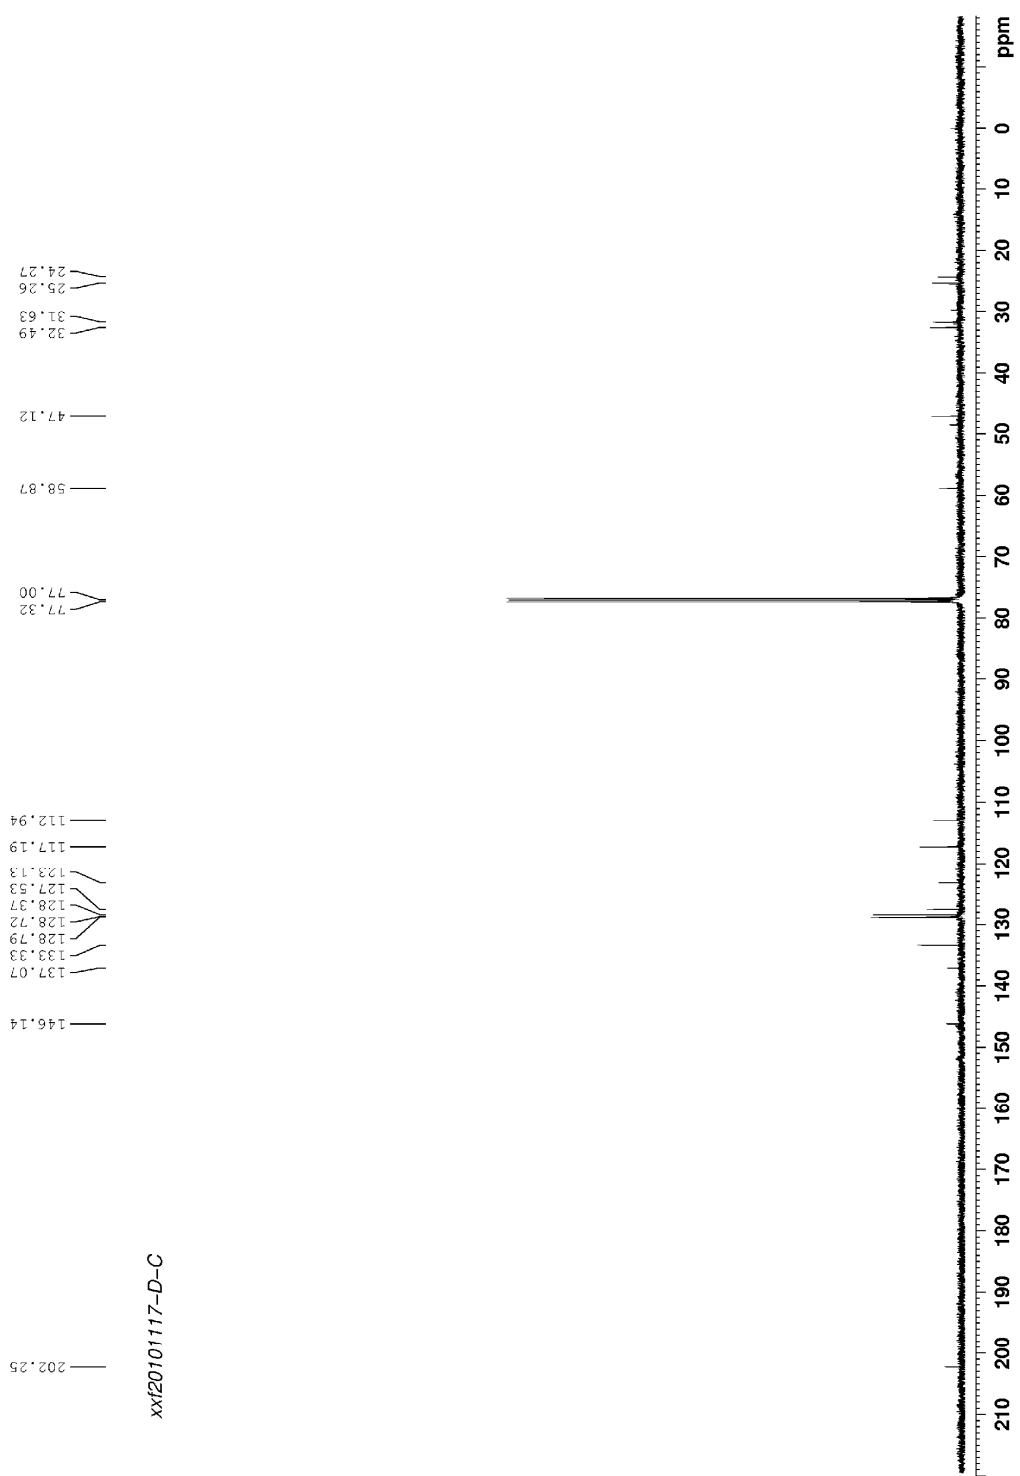

## 2D NMR of product **2a**

### HMBC

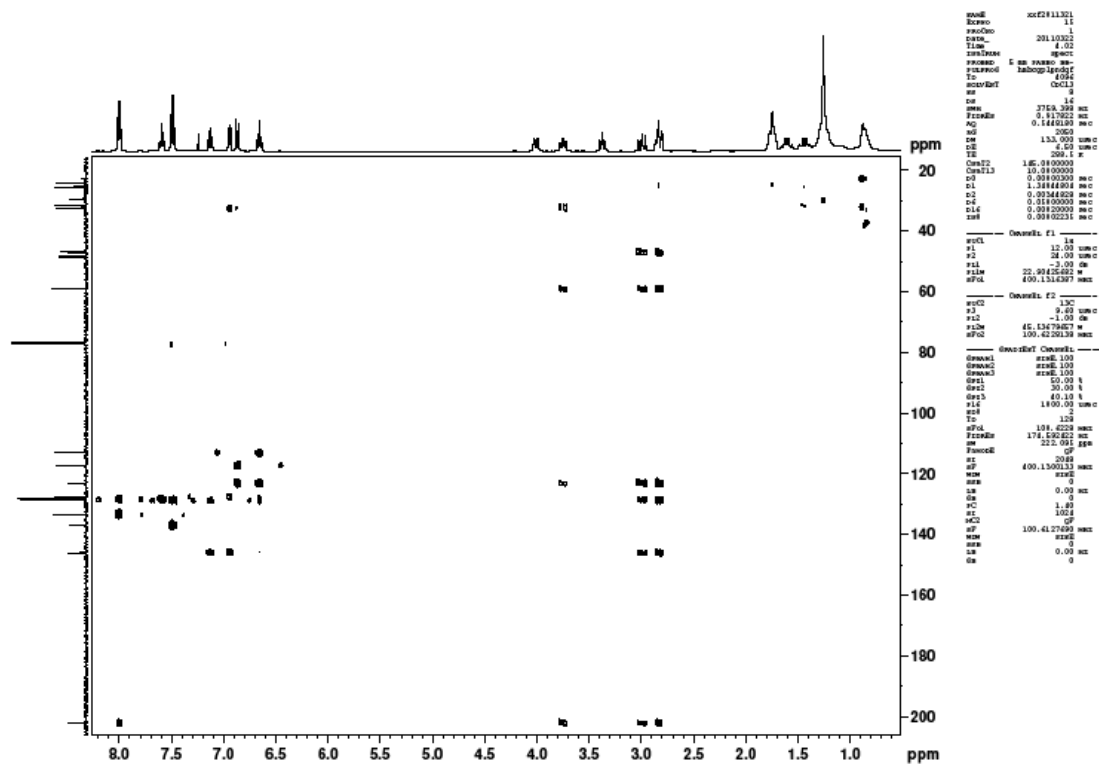



## H-H cosy

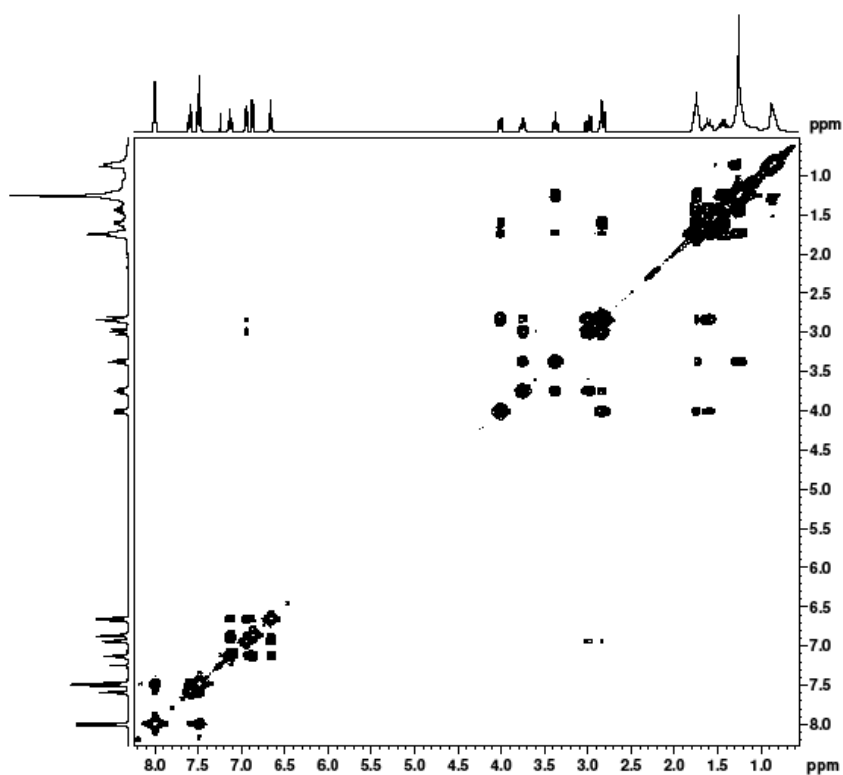

```
NAME      xzf2011321
EXPNO     14
PROCNO    1
DATA_     20110322
F1acq     2.57
SPECTRUM  spc.ac
PROCRES   5 nm F2BBO HB-
PULPROG   cosyzgpg
TD         2145
SOLVENT    CDCl3
NS         1
DS         0
SWH        3709.338 Hz
FIDRES     1.835044 Hz
AQ         0.2724240 sec
RG         40.3
DM         133.000 usec
DE         6.50 usec
TE         299.7 K
D0         0.00000000 sec
D1         1.40000000 sec
D13        0.00000400 sec
D16        0.00020000 sec
DRO        0.00024600 sec

----- CHANNEL f1 -----
NUC1       1H
P0         12.00 usec
P1         12.00 usec
PL1        -3.00 dB
PL12W      22.90425892 W
SFO1       400.1314397 MHz

----- GRADIENT CHANNEL -----
GB1AM1     SINE.100
GB1        15.00 A
P16        1000.00 usec
HD0        1
TD         120
SFO1       400.1316 MHz
FIDRES     29.370300 Hz
DM         9.395 ppm
P16MODE    GP
SI         1024
SF         400.1300132 MHz
NS1        SINE
SSB        0
LB         0.00 Hz
GB         0
PC         1.40
SI         1024
MC2        GP
SF         400.1300153 MHz
NS2        SINE
SSB        0
LB         0.00 Hz
GB         0
```



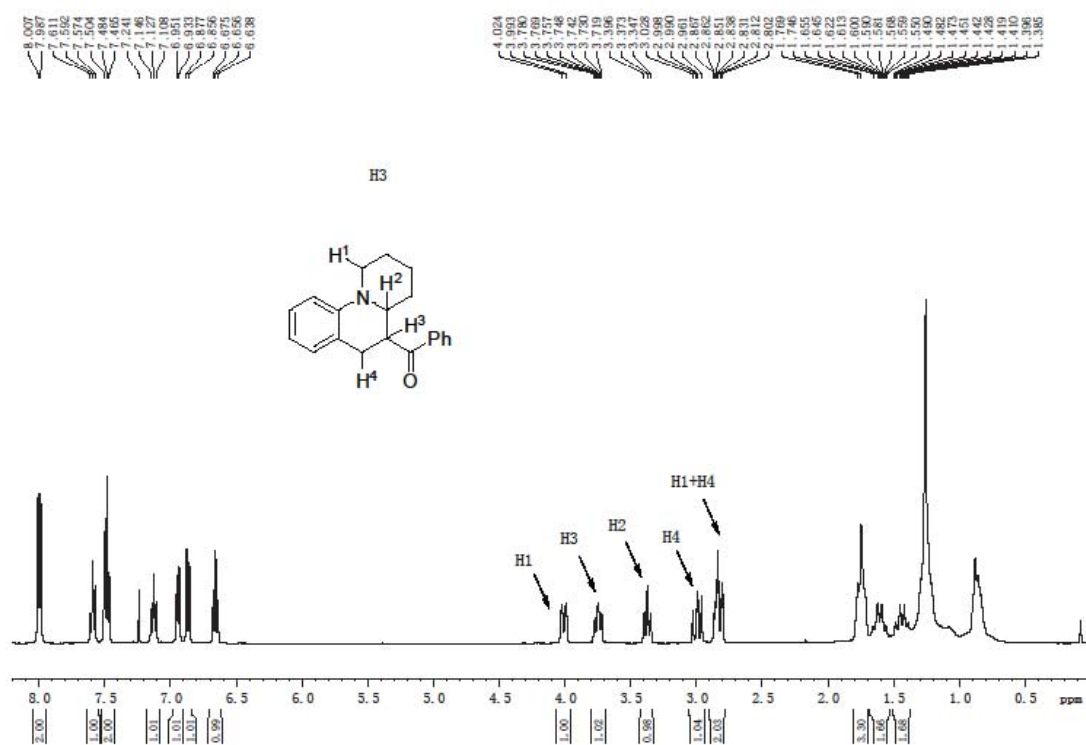

Supplement: c1ra00789k.pdf [file c1ra00789k.pdf]
